# Supplementary material for: Comprehensive characterization of multi-omics landscapes between gut microbial metabolites and the druggable genome in sepsis
Source: Front Immunol. 2025 Jul 21;16:1597676. doi: 10.3389/fimmu.2025.1597676 (PMC12318984; doi:10.3389/fimmu.2025.1597676)
Supplement: Supplementary file 2 [file Table1.xlsx]

## Sheet: S1
Table S1. Summary of datasets used for Mendelian randomization (MR) analysis.
Exposure/Outcome	Consortium	Case	Control	Population	Accession number/Phenocode	Web source
Sepsis	FinnGen R11	15156	399149	European	AB1_OTHER_SEPSIS	https://finngen.gitbook.io/documentation/
Streptococcal septicaemia	FinnGen R11	2846	399149	European	AB1_STREPTO_SEPSIS	https://finngen.gitbook.io/documentation/
Sepsis	UK Biobank	10154	454764	European	ieu-b-4980	https://gwas.mrcieu.ac.uk/
Sepsis (critical care)	UK Biobank	1380	429985	European	ieu-b-4982	https://gwas.mrcieu.ac.uk/
Sepsis (28-day death)	UK Biobank	1896	484588	European	ieu-b-5086	https://gwas.mrcieu.ac.uk/
Plasma metabolome	By Chen et al.	8299	-	European	GCST90199621-90201020	https://www.ebi.ac.uk/gwas/
Expression quantitative trait locus (eQTL)	eQTLGen	31684	-	European	-	https://eqtlgen.org/
Protein quantitative trait locus (pQTL)	By Ferkingstad et al.	35559	-	European	-	https://www.decode.com/summarydata/

## Sheet: S2
Table S2. Detailed characteristics of 1,806 druggable GIKs from the Pharos database, corresponding to Figures 1A and 1B.
#GIKs: gene symbol of G-protein-coupled receptors (GPCRs), ion channels (ICs), and kinases
#Tclin: targets with approved drugs
#Tchem: targets without approved drugs but have been shown to bind small molecules with high potency
#Tbio: targets with experimental Gene Ontology (GO) annotations or those meeting at least two of the following: a fractional publication count >5, three or more Gene Reference Into Function (NCBI GeneRIF) annotations, or ≥50 commercial antibodies listed in Antibodypedia
#Tdark, targets manually curated at the primary sequence level in UniProt but not meeting the criteria for Tclin, Tchem, or Tbio
ID	UniProt	GIKs	Protein Family	Target Druggability Level	Name	External Family	Novelty	NCBI Gene Summary	Antibody Count	PubMed Score	PubTator Score	UniProt Function	PDB IDs
81	Q7RTX7	CATSPER4	Ion Channel	Tchem	Cation channel sperm-associated protein 4	IC	0.455492		63	1.69761	0.166667	Voltage-gated calcium channel that plays a central role in calcium-dependent physiological responses essential for successful fertilization, such as sperm hyperactivation, acrosome reaction and chemotaxis towards the oocyte.
115	P25025	CXCR2	GPCR	Tchem	C-X-C chemokine receptor type 2	GPCR	0.00108314	The protein encoded by this gene is a member of the G-protein-coupled receptor family. This protein is a receptor for interleukin 8 (IL8). It binds to IL8 with high affinity, and transduces the signal through a G-protein activated second messenger system. This receptor also binds to chemokine (C-X-C motif) ligand 1 (CXCL1/MGSA), a protein with melanoma growth stimulating activity, and has been sh…	909	1037.19	0.2	Receptor for interleukin-8 which is a powerful neutrophil chemotactic factor. Binding of IL-8 to the receptor causes activation of neutrophils. This response is mediated via a G-protein that activates a phosphatidylinositol-calcium second messenger system. Binds to IL-8 with high affinity. Also binds with high affinity to CXCL3, GRO/MGSA and NAP-2.	4Q3H,5TYT
117	P61073	CXCR4	GPCR	Tclin	C-X-C chemokine receptor type 4	GPCR	0.0002811	This gene encodes a CXC chemokine receptor specific for stromal cell-derived factor-1. The protein has 7 transmembrane regions and is located on the cell surface. It acts with the CD4 protein to support HIV entry into cells and is also highly expressed in breast cancer cells. Mutations in this gene have been associated with WHIM (warts, hypogammaglobulinemia, infections, and myelokathexis) syndro…	1625	4274.44	1	Receptor for the C-X-C chemokine CXCL12/SDF-1 that transduces a signal by increasing intracellular calcium ion levels and enhancing MAPK1/MAPK3 activation (PubMed:10452968, PubMed:28978524, PubMed:18799424, PubMed:24912431). Involved in the AKT signaling cascade (PubMed:24912431). Plays a role in regulation of cell migration, e.g. during wound healing (PubMed:28978524). Acts as a receptor for ext…	2K03,2K04,2K05,2N55,3ODU,3OE0,3OE6,3OE8,3OE9,4RWS
134	Q9Y2W7	KCNIP3	Ion Channel	Tbio	Calsenilin	IC	0.0137155	This gene encodes a member of the family of voltage-gated potassium (Kv) channel-interacting proteins, which belong to the recoverin branch of the EF-hand superfamily. Members of this family are small calcium binding proteins containing EF-hand-like domains. They are integral subunit components of native Kv4 channel complexes that may regulate A-type currents, and hence neuronal excitability, in …	464	100.104	1	Calcium-dependent transcriptional repressor that binds to the DRE element of genes including PDYN and FOS. Affinity for DNA is reduced upon binding to calcium and enhanced by binding to magnesium. Seems to be involved in nociception (By similarity).	2E6W
155	P32302	CXCR5	GPCR	Tchem	C-X-C chemokine receptor type 5	GPCR	0.00214886	This gene encodes a multi-pass membrane protein that belongs to the CXC chemokine receptor family. It is expressed in mature B-cells and Burkitt's lymphoma. This cytokine receptor binds to B-lymphocyte chemoattractant (BLC), and is involved in B-cell migration into B-cell follicles of spleen and Peyer patches. Alternatively spliced transcript variants encoding different isoforms have been describ…	638	561.757	0.2	Cytokine receptor that binds to B-lymphocyte chemoattractant (BLC). Involved in B-cell migration into B-cell follicles of spleen and Peyer patches but not into those of mesenteric or peripheral lymph nodes. May have a regulatory function in Burkitt lymphoma (BL) lymphomagenesis and/or B-cell differentiation.
162	P04839	CYBB	Ion Channel	Tchem	Cytochrome b-245 heavy chain	IC	0.00054866	Cytochrome b (-245) is composed of cytochrome b alpha (CYBA) and beta (CYBB) chain. It has been proposed as a primary component of the microbicidal oxidase system of phagocytes. CYBB deficiency is one of five described biochemical defects associated with chronic granulomatous disease (CGD). In this disorder, there is decreased activity of phagocyte NADPH oxidase; neutrophils are able to phagocyti…	446	2367.82	1	Critical component of the membrane-bound oxidase of phagocytes that generates superoxide. It is the terminal component of a respiratory chain that transfers single electrons from cytoplasmic NADPH across the plasma membrane to molecular oxygen on the exterior. Also functions as a voltage-gated proton channel that mediates the H(+) currents of resting phagocytes. It participates in the regulation …	3A1F
171	Q9HCU4	CELSR2	GPCR	Tbio	Cadherin EGF LAG seven-pass G-type receptor 2	GPCR	0.0265732	The protein encoded by this gene is a member of the flamingo subfamily, part of the cadherin superfamily. The flamingo subfamily consists of nonclassic-type cadherins; a subpopulation that does not interact with catenins. The flamingo cadherins are located at the plasma membrane and have nine cadherin domains, seven epidermal growth factor-like repeats and two laminin A G-type repeats in their ec…	202	42.5675	0.1	Receptor that may have an important role in cell/cell signaling during nervous system formation.
177	Q9NYQ6	CELSR1	GPCR	Tbio	Cadherin EGF LAG seven-pass G-type receptor 1	GPCR	0.0207619	The protein encoded by this gene is a member of the flamingo subfamily, part of the cadherin superfamily. The flamingo subfamily consists of nonclassic-type cadherins; a subpopulation that does not interact with catenins. The flamingo cadherins are located at the plasma membrane and have nine cadherin domains, seven epidermal growth factor-like repeats and two laminin A G-type repeats in their ec…	167	70.4936	0.5	Receptor that may have an important role in cell/cell signaling during nervous system formation.
197	Q8IV77	CNGA4	Ion Channel	Tbio	Cyclic nucleotide-gated cation channel alpha-4		0.0560503	CNGA4 is a modulatory subunit of vertebrate cyclic nucleotide-gated membrane channels that transduce odorant signals (Munger et al., 2001 [PubMed 11739959]).[supplied by OMIM, Mar 2008]	84	17.3423	0.5	Second messenger, cAMP, causes the opening of cation-selective cyclic nucleotide-gated (CNG) channels and depolarization of the neuron (olfactory sensory neurons, OSNs). CNGA4 is the modulatory subunit of this channel which is known to play a central role in the transduction of odorant signals and subsequent adaptation. By accelerating the calcium-mediated negative feedback in olfactory signaling…
199	Q14028	CNGB1	Ion Channel	Tbio	Cyclic nucleotide-gated cation channel beta-1	IC	0.0103492	In humans, the rod photoreceptor cGMP-gated cation channel helps regulate ion flow into the rod photoreceptor outer segment in response to light-induced alteration of the levels of intracellular cGMP. This channel consists of two subunits, alpha and beta, with the protein encoded by this gene representing the beta subunit. Defects in this gene are a cause of cause of retinitis pigmentosa type 45.…	93	115.513	0.333333	Subunit of cyclic nucleotide-gated (CNG) channels, nonselective cation channels, which play important roles in both visual and olfactory signal transduction. When associated with CNGA1, it is involved in the regulation of ion flow into the rod photoreceptor outer segment (ROS), in response to light-induced alteration of the levels of intracellular cGMP.
207	P21554	CNR1	GPCR	Tclin	Cannabinoid receptor 1	GPCR	0.00060063	This gene encodes one of two cannabinoid receptors. The cannabinoids, principally delta-9-tetrahydrocannabinol and synthetic analogs, are psychoactive ingredients of marijuana. The cannabinoid receptors are members of the guanine-nucleotide-binding protein (G-protein) coupled receptor family, which inhibit adenylate cyclase activity in a dose-dependent, stereoselective and pertussis toxin-sensiti…	546	2197.5	1	G-protein coupled receptor for endogenous cannabinoids (eCBs), including N-arachidonoylethanolamide (also called anandamide or AEA) and 2-arachidonoylglycerol (2-AG), as well as phytocannabinoids, such as delta(9)-tetrahydrocannabinol (THC) (PubMed:15620723, PubMed:27768894, PubMed:27851727). Mediates many cannabinoid-induced effects, acting, among others, on food intake, memory loss, gastrointes…	1LVQ,1LVR,2B0Y,2KOE,2MZ2,2MZ3,2MZA,5TGZ,5U09,5XR8,5XRA
258	P49238	CX3CR1	GPCR	Tchem	CX3C chemokine receptor 1	GPCR	0.00114874	Fractalkine is a transmembrane protein and chemokine involved in the adhesion and migration of leukocytes. The protein encoded by this gene is a receptor for fractalkine. The encoded protein also is a coreceptor for HIV-1, and some variations in this gene lead to increased susceptibility to HIV-1 infection and rapid progression to AIDS. Four transcript variants encoding two different isoforms hav…	679	1178.33	2	Receptor for the CX3C chemokine fractalkine (CX3CL1); binds to CX3CL1 and mediates both its adhesive and migratory functions (PubMed:9390561, PubMed:23125415). Acts as coreceptor with CD4 for HIV-1 virus envelope protein (in vitro) (PubMed:9726990). Isoform 2 and isoform 3 seem to be more potent HIV-1 coreceptors than isoform 1 (PubMed:14607932).
272	P49682	CXCR3	GPCR	Tchem	C-X-C chemokine receptor type 3	GPCR	0.00100538	This gene encodes a G protein-coupled receptor with selectivity for three chemokines, termed CXCL9/Mig (monokine induced by interferon-g), CXCL10/IP10 (interferon-g-inducible 10 kDa protein) and CXCL11/I-TAC (interferon-inducible T cell a-chemoattractant). Binding of chemokines to this protein induces cellular responses that are involved in leukocyte traffic, most notably integrin activation, cyt…	966	1152.13	0.2	Isoform 1: Receptor for the C-X-C chemokine CXCL9, CXCL10 and CXCL11 and mediates the proliferation, survival and angiogenic activity of human mesangial cells (HMC) through a heterotrimeric G-protein signaling pathway (PubMed:12782716). Binds to CCL21. Probably promotes cell chemotaxis response.
292	Q96D31	ORAI1	Ion Channel	Tchem	Calcium release-activated calcium channel protein 1	IC	0.00179685	The protein encoded by this gene is a membrane calcium channel subunit that is activated by the calcium sensor STIM1 when calcium stores are depleted. This type of channel is the primary way for calcium influx into T-cells. Defects in this gene are a cause of immune dysfunction with T-cell inactivation due to calcium entry defect type 1 (IDTICED1). [provided by RefSeq, Sep 2011]	449	709.733	0.333333	Ca(2+) release-activated Ca(2+) (CRAC) channel subunit which mediates Ca(2+) influx following depletion of intracellular Ca(2+) stores and channel activation by the Ca(2+) sensor, STIM1 (PubMed:16582901, PubMed:16645049, PubMed:16733527, PubMed:16766533, PubMed:16807233, PubMed:19249086, PubMed:23307288, PubMed:24351972, PubMed:24591628, PubMed:28219928). CRAC channels are the main pathway for Ca…	2MAK,4EHQ
310	Q8NEC5	CATSPER1	Ion Channel	Tchem	Cation channel sperm-associated protein 1	IC	0.0197156	Calcium ions play a primary role in the regulation of sperm motility. This gene belongs to a family of putative cation channels that are specific to spermatozoa and localize to the flagellum. The protein family features a single repeat with six membrane-spanning segments and a predicted calcium-selective pore region. [provided by RefSeq, Jul 2008]	116	74.3241	0.5	Voltage-gated calcium channel that plays a central role in calcium-dependent physiological responses essential for successful fertilization, such as sperm hyperactivation, acrosome reaction and chemotaxis towards the oocyte.
311	Q86XQ3	CATSPER3	Ion Channel	Tchem	Cation channel sperm-associated protein 3	IC	0.0991961		41	13.0094	0.166667	Voltage-gated calcium channel that plays a central role in calcium-dependent physiological responses essential for successful fertilization, such as sperm hyperactivation, acrosome reaction and chemotaxis towards the oocyte.
330	O00574	CXCR6	GPCR	Tchem	C-X-C chemokine receptor type 6	GPCR	0.00602345		687	210.4	1	Receptor for the C-X-C chemokine CXCL16. Used as a coreceptor by SIVs and by strains of HIV-2 and m-tropic HIV-1.
333	P25024	CXCR1	GPCR	Tchem	C-X-C chemokine receptor type 1	GPCR	0.00224501	The protein encoded by this gene is a member of the G-protein-coupled receptor family. This protein is a receptor for interleukin 8 (IL8). It binds to IL8 with high affinity, and transduces the signal through a G-protein activated second messenger system. Knockout studies in mice suggested that this protein inhibits embryonic oligodendrocyte precursor migration in developing spinal cord. This gen…	549	511.768	0.5	Receptor to interleukin-8, which is a powerful neutrophils chemotactic factor. Binding of IL-8 to the receptor causes activation of neutrophils. This response is mediated via a G-protein that activate a phosphatidylinositol-calcium second messenger system. This receptor binds to IL-8 with a high affinity and to MGSA (GRO) with a low affinity.	1ILP,1ILQ,2LNL
336	P06493	CDK1	Kinase	Tchem	Cyclin-dependent kinase 1	Kinase	0.00040776	The protein encoded by this gene is a member of the Ser/Thr protein kinase family. This protein is a catalytic subunit of the highly conserved protein kinase complex known as M-phase promoting factor (MPF), which is essential for G1/S and G2/M phase transitions of eukaryotic cell cycle. Mitotic cyclins stably associate with this protein and function as regulatory subunits. The kinase activity of …	2457	2617.57	0.166667	Plays a key role in the control of the eukaryotic cell cycle by modulating the centrosome cycle as well as mitotic onset; promotes G2-M transition, and regulates G1 progress and G1-S transition via association with multiple interphase cyclins. Required in higher cells for entry into S-phase and mitosis. Phosphorylates PARVA/actopaxin, APC, AMPH, APC, BARD1, Bcl-xL/BCL2L1, BRCA2, CALD1, CASP8, CDC…	1LC9,4Y72,4YC3,4YC6,5HQ0,5LQF
370	Q16281	CNGA3	Ion Channel	Tchem	Cyclic nucleotide-gated cation channel alpha-3	IC	0.00818181	This gene encodes a member of the cyclic nucleotide-gated cation channel protein family which is required for normal vision and olfactory signal transduction. Mutations in this gene are associated with achromatopsia (rod monochromacy) and color blindness. Two alternatively spliced transcripts encoding different isoforms have been described. [provided by RefSeq, Jul 2008]	108	157.214	0.333333	Visual signal transduction is mediated by a G-protein coupled cascade using cGMP as second messenger. This protein can be activated by cyclic GMP which leads to an opening of the cation channel and thereby causing a depolarization of cone photoreceptors. Induced a flickering channel gating, weakened the outward rectification in the presence of extracellular calcium, increased sensitivity for L-ci…	3SWY
382	P34972	CNR2	GPCR	Tchem	Cannabinoid receptor 2	GPCR	0.00215391	The cannabinoid delta-9-tetrahydrocannabinol is the principal psychoactive ingredient of marijuana. The proteins encoded by this gene and the cannabinoid receptor 1 (brain) (CNR1) gene have the characteristics of a guanine nucleotide-binding protein (G-protein)-coupled receptor for cannabinoids. They inhibit adenylate cyclase activity in a dose-dependent, stereoselective, and pertussis toxin-sens…	428	554.306	0.333333	Heterotrimeric G protein-coupled receptor for endocannabinoid 2-arachidonoylglycerol mediating inhibition of adenylate cyclase. May function in inflammatory response, nociceptive transmission and bone homeostasis.	2KI9
423	Q8NEV1	CSNK2A3	Kinase	Tdark	Casein kinase II subunit alpha 3		0.930351	This gene encodes a protein that is highly similar to the casein kinase II alpha protein. Casein kinase II is a serine/threonine protein kinase complex that phosphorylates numerous substrates including casein. The alpha subunit is the catalytic component of the complex. Mutations in this gene may be associated with a susceptibility to lung cancer. There are contradictory views among published rep…	11	1.85577	0.333333	Probable catalytic subunit of a constitutively active serine/threonine-protein kinase complex that phosphorylates a large number of substrates containing acidic residues C-terminal to the phosphorylated serine or threonine. Amplification-dependent oncogene; promotes cell proliferation and tumorigenesis by down-regulating expression of the tumor suppressor protein, PML. May play a role in the path…
425	O14936	CASK	Kinase	Tchem	Peripheral plasma membrane protein CASK	Kinase	0.00856437	This gene encodes a calcium/calmodulin-dependent serine protein kinase. The encoded protein is a MAGUK (membrane-associated guanylate kinase) protein family member. These proteins are scaffold proteins and the encoded protein is located at synapses in the brain. Mutations in this gene are associated with FG syndrome 4, intellectual disability and microcephaly with pontine and cerebellar hypoplasi…	272	161.941	1	Multidomain scaffolding protein with a role in synaptic transmembrane protein anchoring and ion channel trafficking. Contributes to neural development and regulation of gene expression via interaction with the transcription factor TBR1. Binds to cell-surface proteins, including amyloid precursor protein, neurexins and syndecans. May mediate a link between the extracellular matrix and the actin cy…	1KGD,1KWA,1ZL8,3C0G,3C0H,3C0I,3MFR,3MFS,3MFT,3MFU,3TAC
426	P41240	CSK	Kinase	Tchem	Tyrosine-protein kinase CSK	Kinase	0.00186612	The protein encoded by this gene is involved in multiple pathways, including the regulation of Src family kinases. It plays an important role in T-cell activation through its association with the protein encoded by the protein tyrosine phosphatase, non-receptor type 22 (PTPN22) gene. This protein also phosphorylates C-terminal tyrosine residues on multiple substrates, including the protein encode…	691	454.152	1	Non-receptor tyrosine-protein kinase that plays an important role in the regulation of cell growth, differentiation, migration and immune response. Phosphorylates tyrosine residues located in the C-terminal tails of Src-family kinases (SFKs) including LCK, SRC, HCK, FYN, LYN, CSK or YES1. Upon tail phosphorylation, Src-family members engage in intramolecular interactions between the phosphotyrosi…	1BYG,1CSK,3D7T,3D7U,3EAC,3EAZ
430	Q96P56	CATSPER2	Ion Channel	Tchem	Cation channel sperm-associated protein 2		0.0370103	This gene encodes a member of a family of cation channel proteins that localize to the flagellum of spermatozoa. Defects at this locus causes male infertility. Alternatively spliced transcript variants have been observed at this locus. Readthrough transcription originates upstream of this locus in diphosphoinositol pentakisphosphate kinase 1 pseudogene 1 and is represented by GeneID:110006325. Re…	133	27.8992	0.25	Voltage-gated calcium channel that plays a central role in calcium-dependent physiological responses essential for successful fertilization, such as sperm hyperactivation, acrosome reaction and chemotaxis towards the oocyte.
473	P51686	CCR9	GPCR	Tchem	C-C chemokine receptor type 9	GPCR	0.00654663	The protein encoded by this gene is a member of the beta chemokine receptor family. It is predicted to be a seven transmembrane protein similar to G protein-coupled receptors. Chemokines and their receptors are key regulators of the thymocytes migration and maturation in normal and inflammation conditions. The specific ligand of this receptor is CCL25. It has been found that this gene is differen…	599	176.335	0.424242	Receptor for chemokine SCYA25/TECK. Subsequently transduces a signal by increasing the intracellular calcium ions level.	5LWE
527	Q9NQW8	CNGB3	Ion Channel	Tchem	Cyclic nucleotide-gated cation channel beta-3	IC	0.0117494	This gene encodes the beta subunit of a cyclic nucleotide-gated ion channel. The encoded beta subunit appears to play a role in modulation of channel function in cone photoreceptors. This heterotetrameric channel is necessary for sensory transduction, and mutations in this gene have been associated with achromatopsia 3, progressive cone dystrophy, and juvenile macular degeneration, also known as …	106	96.6527	1	Visual signal transduction is mediated by a G-protein coupled cascade using cGMP as second messenger. This protein can be activated by cGMP which leads to an opening of the cation channel and thereby causing a depolarization of rod photoreceptors. Induced a flickering channel gating, weakened the outward rectification in the presence of extracellular calcium, increased sensitivity for L-cis dilti…
569	P21728	DRD1	GPCR	Tclin	D(1A) dopamine receptor	GPCR	0.00165886	This gene encodes the D1 subtype of the dopamine receptor. The D1 subtype is the most abundant dopamine receptor in the central nervous system. This G-protein coupled receptor stimulates adenylyl cyclase and activates cyclic AMP-dependent protein kinases. D1 receptors regulate neuronal growth and development, mediate some behavioral responses, and modulate dopamine receptor D2-mediated events. Al…	613	686.062	0.5	Dopamine receptor whose activity is mediated by G proteins which activate adenylyl cyclase.	1OZ5
570	P14416	DRD2	GPCR	Tclin	D(2) dopamine receptor	GPCR	0.00033797	This gene encodes the D2 subtype of the dopamine receptor. This G-protein coupled receptor inhibits adenylyl cyclase activity. A missense mutation in this gene causes myoclonus dystonia; other mutations have been associated with schizophrenia. Alternative splicing of this gene results in two transcript variants encoding different isoforms. A third variant has been described, but it has not been d…	337	3685.77	1.5	Dopamine receptor whose activity is mediated by G proteins which inhibit adenylyl cyclase.	1I15,5AER,6CM4
572	P21917	DRD4	GPCR	Tchem	D(4) dopamine receptor	GPCR	0.00099622	This gene encodes the D4 subtype of the dopamine receptor. The D4 subtype is a G-protein coupled receptor which inhibits adenylyl cyclase. It is a target for drugs which treat schizophrenia and Parkinson disease. Mutations in this gene have been associated with various behavioral phenotypes, including autonomic nervous system dysfunction, attention deficit/hyperactivity disorder, and the personal…	424	1183.26	1	Dopamine receptor responsible for neuronal signaling in the mesolimbic system of the brain, an area of the brain that regulates emotion and complex behavior. Activated by dopamine, but also by epinephrine and norepinephrine, and by numerous synthetic agonists and drugs (PubMed:9003072, PubMed:16423344, PubMed:27659709, PubMed:29051383). Agonist binding triggers signaling via G proteins that inhib…	5WIU,5WIV
588	Q5JZY3	EPHA10	Kinase	Tbio	Ephrin type-A receptor 10	Kinase	0.0641671	Ephrin receptors, the largest subfamily of receptor tyrosine kinases (RTKs), and their ephrin ligands are important mediators of cell-cell communication regulating cell attachment, shape, and mobility in neuronal and epithelial cells (Aasheim et al., 2005 [PubMed 15777695]). See MIM 179610 for additional background on Eph receptors and ephrins.[supplied by OMIM, Mar 2008]	235	22.633	1	Receptor for members of the ephrin-A family. Binds to EFNA3, EFNA4 and EFNA5.
589	P54753	EPHB3	Kinase	Tchem	Ephrin type-B receptor 3	Kinase	0.00746779	Ephrin receptors and their ligands, the ephrins, mediate numerous developmental processes, particularly in the nervous system. Based on their structures and sequence relationships, ephrins are divided into the ephrin-A (EFNA) class, which are anchored to the membrane by a glycosylphosphatidylinositol linkage, and the ephrin-B (EFNB) class, which are transmembrane proteins. The Eph family of recep…	510	109.574	1	Receptor tyrosine kinase which binds promiscuously transmembrane ephrin-B family ligands residing on adjacent cells, leading to contact-dependent bidirectional signaling into neighboring cells. The signaling pathway downstream of the receptor is referred to as forward signaling while the signaling pathway downstream of the ephrin ligand is referred to as reverse signaling. Generally has an overla…	3P1I,3ZFY,5L6O,5L6P
607	P47775	GPR12	GPCR	Tbio	G-protein coupled receptor 12	group A	0.0471238		276	24.3261	0.333333	Promotes neurite outgrowth and blocks myelin inhibition in neurons (By similarity). Receptor with constitutive G(s) signaling activity that stimulates cyclic AMP production.
608	Q76MJ5	ERN2	Kinase	Tchem	Serine/threonine-protein kinase/endoribonuclease IRE2		0.0275115		197	48.3298	1	Induces translational repression through 28S ribosomal RNA cleavage in response to ER stress. Pro-apoptotic. Appears to play no role in the unfolded-protein response, unlike closely related proteins.
609	Q14330	GPR18	GPCR	Tchem	N-arachidonyl glycine receptor	group A	0.0178347		335	84.3184	1	Receptor for endocannabinoid N-arachidonyl glycine (NAGly) (PubMed:16844083, PubMed:24762058, PubMed:27572937). However, conflicting results about the role of NAGly as an agonist are reported (PubMed:27018161). Can also be activated by plant-derived and synthetic cannabinoid agonists (PubMed:24762058). The activity of this receptor is mediated by G proteins which inhibit adenylyl cyclase (PubMed:…
610	P46091	GPR1	GPCR	Tchem	G-protein coupled receptor 1	GPCR	0.0131342		222	87.5302	2	Receptor for the inflammation-associated leukocyte chemoattractant chemerin/RARRES2 suggesting a role for this receptor in the regulation of inflammation. Can act as a coreceptor for HIV-1.
611	Q99679	GPR21	GPCR	Tdark	Probable G-protein coupled receptor 21	group A	0.908656	This gene encodes a member of the G-protein-coupled receptor 1 family. G-protein coupled receptors are membrane proteins which activate signaling cascades as a response to extracellular stress. The encoded protein activates a Gq signal transduction pathway which mobilizes calcium. [provided by RefSeq, Nov 2012]	48	2.57652	0.25	Orphan receptor.
612	Q8NDV2	GPR26	GPCR	Tbio	G-protein coupled receptor 26	group A	0.133628	This gene encodes a G protein-couple receptor protein. G-protein-coupled receptors are a large family of membrane proteins that are involved in cellular responses to environmental stimuli, neurotransmitters, and hormones. The encoded protein may play a role in neurodegenerative diseases. Epigenetic silencing of this gene has been observed in gliomas. [provided by RefSeq, Sep 2016]	151	8.62748	0.333333	Orphan receptor. Displays a significant level of constitutive activity. Its effect is mediated by G(s)-alpha protein that stimulate adenylate cyclase, resulting in an elevation of intracellular cAMP.
657	Q92772	CDKL2	Kinase	Tchem	Cyclin-dependent kinase-like 2		0.0669719	This gene product is a member of a large family of CDC2-related serine/threonine protein kinases. It accumulates primarily in the cytoplasm, with lower levels in the nucleus. [provided by RefSeq, Jul 2008]	211	32.4813	0.25		4AAA,4BBM
658	Q14004	CDK13	Kinase	Tchem	Cyclin-dependent kinase 13		0.0308481	The protein encoded by this gene is a member of the cyclin-dependent serine/threonine protein kinase family. Members of this family are well known for their essential roles as master switches in cell cycle control. The exact function of this protein has not yet been determined, but it may play a role in mRNA processing and may be involved in regulation of hematopoiesis. Alternatively spliced tran…	179	44.2703	0.2	Cyclin-dependent kinase which displays CTD kinase activity and is required for RNA splicing. Has CTD kinase activity by hyperphosphorylating the C-terminal heptapeptide repeat domain (CTD) of the largest RNA polymerase II subunit RPB1, thereby acting as a key regulator of transcription elongation. Required for RNA splicing, probably by phosphorylating SRSF1/SF2. Required during hematopoiesis. In …	5EFQ
663	P50613	CDK7	Kinase	Tchem	Cyclin-dependent kinase 7	Kinase	0.00322814	The protein encoded by this gene is a member of the cyclin-dependent protein kinase (CDK) family. CDK family members are highly similar to the gene products of Saccharomyces cerevisiae cdc28, and Schizosaccharomyces pombe cdc2, and are known to be important regulators of cell cycle progression. This protein forms a trimeric complex with cyclin H and MAT1, which functions as a Cdk-activating kinas…	756	344.906	0.2	Serine/threonine kinase involved in cell cycle control and in RNA polymerase II-mediated RNA transcription. Cyclin-dependent kinases (CDKs) are activated by the binding to a cyclin and mediate the progression through the cell cycle. Each different complex controls a specific transition between 2 subsequent phases in the cell cycle. Required for both activation and complex formation of CDK1/cyclin…	1LG3,1PA8,1UA2,2HIC
678	P13569	CFTR	Ion Channel	Tclin	Cystic fibrosis transmembrane conductance regulator	IC	0.00012639	This gene encodes a member of the ATP-binding cassette (ABC) transporter superfamily. The encoded protein functions as a chloride channel, making it unique among members of this protein family, and controls ion and water secretion and absorption in epithelial tissues. Channel activation is mediated by cycles of regulatory domain phosphorylation, ATP-binding by the nucleotide-binding domains, and …	999	2570.52	0.333333	Epithelial ion channel that plays an important role in the regulation of epithelial ion and water transport and fluid homeostasis (PubMed:26823428). Mediates the transport of chloride ions across the cell membrane (PubMed:10792060, PubMed:11524016, PubMed:11707463, PubMed:12519745, PubMed:15010471, PubMed:12588899, PubMed:17036051, PubMed:19398555, PubMed:19621064, PubMed:22178883, PubMed:2533077…	1NBD,1XMI,1XMJ,2BBO,2BBS,2BBT,2LOB,2PZE,2PZF,2PZG,3GD7,3ISW,4WZ6,5D2D,5D3E,5D3F,5TF7,5TF8,5TFA,5TFB,5TFC,5TFD,5TFF,5TFG,5TFI,5TFJ,5TGK,5UAK,6HEP
717	P29317	EPHA2	Kinase	Tclin	Ephrin type-A receptor 2	Kinase	0.00191002	This gene belongs to the ephrin receptor subfamily of the protein-tyrosine kinase family. EPH and EPH-related receptors have been implicated in mediating developmental events, particularly in the nervous system. Receptors in the EPH subfamily typically have a single kinase domain and an extracellular region containing a Cys-rich domain and 2 fibronectin type III repeats. The ephrin receptors are …	1179	821.739	0.5	Receptor tyrosine kinase which binds promiscuously membrane-bound ephrin-A family ligands residing on adjacent cells, leading to contact-dependent bidirectional signaling into neighboring cells. The signaling pathway downstream of the receptor is referred to as forward signaling while the signaling pathway downstream of the ephrin ligand is referred to as reverse signaling. Activated by the ligan…	1MQB,2E8N,2K9Y,2KSO,2X10,2X11,3C8X,3CZU,3FL7,3HEI,3HPN,3KKA,3MBW,3MX0,3SKJ,4P2K,4PDO,4TRL,5EK7,5I9U,5I9V,5I9W,5I9X,5I9Y,5I9Z,5IA0,5IA1,5IA2,5IA3,5IA4,5IA5,5NJZ,5NK0,5NK1,5NK2,5NK3,5NK4,5NK5,5NK6,5NK7,5NK8,5NK9,5NKA,5NKB,5NKC,5NKD,5NKE,5NKF,5NKG,5NKH,5NKI,5NZ9,6B9L,6F7M,6F7N,6FNF,6FNG,6FNH
735	O75460	ERN1	Kinase	Tchem	Serine/threonine-protein kinase/endoribonuclease IRE1	Kinase	0.00141922	This gene encodes the transmembrane protein kinase inositol-requiring enzyme 1. The encoded protein contains two functional catalytic domains, a serine/threonine-protein kinase domain and an endoribonuclease domain. This protein functions as a sensor of unfolded proteins in the endoplasmic reticulum (ER) and triggers an intracellular signaling pathway termed the unfolded protein response (UPR). T…	592	892.235	2	Serine/threonine-protein kinase and endoribonuclease that acts as a key sensor for the endoplasmic reticulum unfolded protein response (UPR) (PubMed:11779464, PubMed:11175748, PubMed:12637535, PubMed:9637683, PubMed:21317875). In unstressed cells, the endoplasmic reticulum luminal domain is maintained in its inactive monomeric state by binding to the endoplasmic reticulum chaperone HSPA5/BiP (Pub…	2HZ6,3P23,4U6R,4YZ9,4YZC,4YZD,4Z7G,4Z7H,5HGI
736	P49685	GPR15	GPCR	Tbio	G-protein coupled receptor 15		0.00673057	This gene encodes a G protein-coupled receptor that acts as a chemokine receptor for human immunodeficiency virus type 1 and 2. The encoded protein localizes to the cell membrane. [provided by RefSeq, Nov 2012]	364	224.943	1	Probable chemokine receptor. Alternative coreceptor with CD4 for HIV-1 infection.
737	Q13304	GPR17	GPCR	Tchem	Uracil nucleotide/cysteinyl leukotriene receptor		0.00545502		362	255.223	1	Dual specificity receptor for uracil nucleotides and cysteinyl leukotrienes (CysLTs). Signals through G(i) and inhibition of adenylyl cyclase. May mediate brain damage by nucleotides and CysLTs following ischemia.
738	Q15760	GPR19	GPCR	Tbio	Probable G-protein coupled receptor 19	group A			146	0	1	Orphan receptor.
740	Q99680	GPR22	GPCR	Tbio	G-protein coupled receptor 22	group A	0.182275	This gene is a member of the G-protein coupled receptor 1 family and encodes a multi-pass membrane protein. [provided by RefSeq, Jul 2008]	270	7.77689	0.333333	Orphan G-protein coupled receptor. Seems to act through a G(i)/G(o) mediated pathway (PubMed:18539757). May be involved in ciliogenesis (By similarity).
741	O00155	GPR25	GPCR	Tdark	Probable G-protein coupled receptor 25	group A	0.421427	This gene is intronless and encodes a member of the G-protein coupled receptor 1 family. G-protein coupled receptors are membrane proteins which activate signaling cascades as a response to extracellular stress. This gene has been linked to arterial stiffness. [provided by RefSeq, Nov 2012]	166	3.10873	0.5	Orphan receptor.
743	O00270	GPR31	GPCR	Tbio	12-(S)-hydroxy-5,8,10,14-eicosatetraenoic acid receptor	group A	0.0916069		110	35.6886	0.5	High-affinity receptor for 12-(S)-hydroxy-5,8,10,14-eicosatetraenoic acid (12-S-HETE). 12-(S)-HETE is an arachidonic acid metabolite secreted by platelets and tumor cells, and known to induce endothelial cells retraction allowing invasive cell access to the subendothelial matrix, which is a critical step for extravasation or metastasis. Ligand-binding lead to activation of ERK1/2 (MAPK3/MAPK1), M…
744	O75388	GPR32	GPCR	Tchem	Probable G-protein coupled receptor 32	group A	0.0551913	This gene is intronless and encodes a member of the G-protein coupled receptor 1 family. The encoded protein binds to resolvin D1 and lipoxin A4 and has been linked to pulmonary inflammation. A related pseudogene has been identified on chromosome 19. [provided by RefSeq, Nov 2012]	280	24.351	0.333333	Orphan receptor.
745	Q49SQ1	GPR33	GPCR	Tdark	Probable G-protein coupled receptor 33	GPCR	0.317367	This gene has been identified as an orphan chemoattractant G-protein-coupled receptors (GPCR) pseudogene. Studies have shown that the inactivated gene is present as the predominant allele in the human population. A small fraction of the human population has been found to harbor an intact allele.[provided by RefSeq, Oct 2010]	5	4.89539	0.333333	Orphan receptor; could be a chemoattractant receptor.
746	Q9UPC5	GPR34	GPCR	Tchem	Probable G-protein coupled receptor 34	group A	0.0381063	G protein-coupled receptors (GPCRs), such as GPR34, are integral membrane proteins containing 7 putative transmembrane domains (TMs). These proteins mediate signals to the interior of the cell via activation of heterotrimeric G proteins that in turn activate various effector proteins, ultimately resulting in a physiologic response.[supplied by OMIM, Apr 2006]	275	37.123	0.833333	Orphan receptor.
747	O43194	GPR39	GPCR	Tchem	G-protein coupled receptor 39		0.0124461	This gene is a member of the ghrelin receptor family and encodes a rhodopsin-type G-protein-coupled receptor (GPCR). The encoded protein is involved in zinc-dependent signaling in epithelial tissue in intestines, prostate and salivary glands. The protein may also be involved in the pathophysiology of depression. [provided by RefSeq, Jun 2016]	340	108.018	0.5	Zn(2+) acts as an agonist. This receptor mediates its action by association with G proteins that activate a phosphatidylinositol-calcium second messenger system. Its effect is mediated mainly through G(q)-alpha and G(12)/G(13) proteins. Involved in regulation of body weight, gastrointestinal mobility, hormone secretion and cell death (By similarity).
748	O15529	GPR42	GPCR	Tdark	G-protein coupled receptor 42	GPCR	0.510422		6	1.9342	0.25	Probable G protein-coupled receptor that may be activated by a major product of dietary fiber digestion, the short chain fatty acids (SCFAs), and that may play a role in the regulation of whole-body energy homeostasis and/or in intestinal immunity.
749	Q9Y5Y3	GPR45	GPCR	Tbio	Probable G-protein coupled receptor 45	group A	0.0836692	This intronless gene encodes a member of the G protein-coupled receptor (GPCR) family. Members of this protein family contain seven putative transmembrane domains and may mediate signaling processes to the interior of the cell via activation of heterotrimeric G proteins. This protein may function in the central nervous system. [provided by RefSeq, Jul 2008]	166	11.4289	0.533333	Orphan receptor. May play a role in brain function.
793	P54764	EPHA4	Kinase	Tchem	Ephrin type-A receptor 4	Kinase	0.00321698	This gene belongs to the ephrin receptor subfamily of the protein-tyrosine kinase family. EPH and EPH-related receptors have been implicated in mediating developmental events, particularly in the nervous system. Receptors in the EPH subfamily typically have a single kinase domain and an extracellular region containing a Cys-rich domain and 2 fibronectin type III repeats. The ephrin receptors are …	635	1846.85	0.25	Receptor tyrosine kinase which binds membrane-bound ephrin family ligands residing on adjacent cells, leading to contact-dependent bidirectional signaling into neighboring cells. The signaling pathway downstream of the receptor is referred to as forward signaling while the signaling pathway downstream of the ephrin ligand is referred to as reverse signaling. Highly promiscuous, it has the unique …	2LW8,2WO1,2WO2,2WO3,3CKH,3GXU,4BK4,4BK5,4BKA,4BKF,4M4P,4M4R,4W4Z,4W50,5JR2
795	P29322	EPHA8	Kinase	Tchem	Ephrin type-A receptor 8	Kinase	0.0224426	This gene encodes a member of the ephrin receptor subfamily of the protein-tyrosine kinase family. EPH and EPH-related receptors have been implicated in mediating developmental events, particularly in the nervous system. Receptors in the EPH subfamily typically have a single kinase domain and an extracellular region containing a Cys-rich domain and 2 fibronectin type III repeats. The ephrin recep…	149	60.2583	0.090909	Receptor tyrosine kinase which binds promiscuously GPI-anchored ephrin-A family ligands residing on adjacent cells, leading to contact-dependent bidirectional signaling into neighboring cells. The signaling pathway downstream of the receptor is referred to as forward signaling while the signaling pathway downstream of the ephrin ligand is referred to as reverse signaling. The GPI-anchored ephrin-…	1UCV,1X5L,3KUL
796	P54762	EPHB1	Kinase	Tchem	Ephrin type-B receptor 1	Kinase	0.0142472	Ephrin receptors and their ligands, the ephrins, mediate numerous developmental processes, particularly in the nervous system. Based on their structures and sequence relationships, ephrins are divided into the ephrin-A (EFNA) class, which are anchored to the membrane by a glycosylphosphatidylinositol linkage, and the ephrin-B (EFNB) class, which are transmembrane proteins. The Eph family of recep…	524	77.6885	1	Receptor tyrosine kinase which binds promiscuously transmembrane ephrin-B family ligands residing on adjacent cells, leading to contact-dependent bidirectional signaling into neighboring cells. The signaling pathway downstream of the receptor is referred to as forward signaling while the signaling pathway downstream of the ephrin ligand is referred to as reverse signaling. Cognate/functional ephr…	2DJS,2EAO,3ZFX,5MJA,5MJB
798	P54760	EPHB4	Kinase	Tchem	Ephrin type-B receptor 4	Kinase	0.00422975	Ephrin receptors and their ligands, the ephrins, mediate numerous developmental processes, particularly in the nervous system. Based on their structures and sequence relationships, ephrins are divided into the ephrin-A (EFNA) class, which are anchored to the membrane by a glycosylphosphatidylinositol linkage, and the ephrin-B (EFNB) class, which are transmembrane proteins. The Eph family of recep…	627	322.199	0.111111	Receptor tyrosine kinase which binds promiscuously transmembrane ephrin-B family ligands residing on adjacent cells, leading to contact-dependent bidirectional signaling into neighboring cells. The signaling pathway downstream of the receptor is referred to as forward signaling while the signaling pathway downstream of the ephrin ligand is referred to as reverse signaling. Together with its cogna…	2BBA,2E7H,2HLE,2QKQ,2VWU,2VWV,2VWW,2VWX,2VWY,2VWZ,2VX0,2VX1,2X9F,2XVD,2YN8,3ZEW,4AW5,4BB4,6FNI,6FNJ,6FNK,6FNL,6FNM
800	Q15303	ERBB4	Kinase	Tclin	Receptor tyrosine-protein kinase erbB-4	Kinase	0.00112919	This gene is a member of the Tyr protein kinase family and the epidermal growth factor receptor subfamily. It encodes a single-pass type I membrane protein with multiple cysteine rich domains, a transmembrane domain, a tyrosine kinase domain, a phosphotidylinositol-3 kinase binding site and a PDZ domain binding motif. The protein binds to and is activated by neuregulins and other factors and indu…	1324	850.424	0.25	Tyrosine-protein kinase that plays an essential role as cell surface receptor for neuregulins and EGF family members and regulates development of the heart, the central nervous system and the mammary gland, gene transcription, cell proliferation, differentiation, migration and apoptosis. Required for normal cardiac muscle differentiation during embryonic development, and for postnatal cardiomyocy…	2AHX,2L2T,2LCX,2R4B,3BBT,3BBW,3BCE,3U2P,3U7U,3U9U
809	Q99678	GPR20	GPCR	Tdark	G-protein coupled receptor 20	group A	0.344353		244	3.09727	0.25	Orphan receptor with constitutive G(i) signaling activity that activate cyclic AMP.
811	Q9NS67	GPR27	GPCR	Tbio	Probable G-protein coupled receptor 27	group A	0.164488	GPR27 is a member of the G protein-coupled receptors (GPCRs), a large family of receptors that have a similar structure characterized by 7 transmembrane domains. Activation of GPCRs by extracellular stimuli such as neurotransmitters, hormones, or light induces an intracellular signaling cascade mediated by heterotrimeric GTP-binding proteins, or G proteins.[supplied by OMIM, May 2010]	268	9.89947	0.166667	Orphan receptor. Possible candidate for amine-like G-protein coupled receptor.
813	Q9HC97	GPR35	GPCR	Tchem	G-protein coupled receptor 35		0.0118858		210	128.017	0.166667	Acts as a receptor for kynurenic acid, an intermediate in the tryptophan metabolic pathway. The activity of this receptor is mediated by G-proteins that elicit calcium mobilization and inositol phosphate production through G(qi/o) proteins.
814	O15354	GPR37	GPCR	Tbio	Prosaposin receptor GPR37		0.0219364	This gene is a member of the G protein-coupled receptor family. The encoded protein contains seven transmembrane domains and is found in cell and endoplasmic reticulum membranes. G protein-coupled receptors are involved in translating outside signals into G protein mediated intracellular effects. This gene product interacts with Parkin and is involved in juvenile Parkinson disease. [provided by R…	281	68.3019	2	Receptor for the neuroprotective and glioprotective factor prosaposin. Ligand binding induces endocytosis, followed by an ERK phosphorylation cascade.
815	P46089	GPR3	GPCR	Tbio	G-protein coupled receptor 3	group A	0.0233111	This gene is a member of the G protein-coupled receptor family and is found in the cell membrane. G protein-coupled receptors, characterized by a seven transmembrane domain motif, are involved in translating outside signals into G protein mediated intracellular effects. The encoded protein activates adenylate cyclase and modulates amyloid-beta production in a mouse model, suggesting that it may p…	342	62.4475	1	Orphan receptor with constitutive G(s) signaling activity that activate cyclic AMP. Has a potential role in modulating a number of brain functions, including behavioral responses to stress (By similarity), amyloid-beta peptide generation in neurons and neurite outgrowth (By similarity). Maintains also meiotic arrest in oocytes (By similarity).
816	P46093	GPR4	GPCR	Tchem	G-protein coupled receptor 4	group A	0.0159299		190	77.4525	1.75	Proton-sensing receptor coupled to several G-proteins, including G(s), G(13) and G(q)/G(11) proteins, leading to cAMP production.
817	Q9Y2T5	GPR52	GPCR	Tchem	G-protein coupled receptor 52	group A	0.0798864	Members of the G protein-coupled receptor (GPR) family play important roles in signal transduction from the external environment to the inside of the cell.[supplied by OMIM, Jul 2002]	268	19.6931	0.333333	Gs-coupled receptor activated by antipsychotics reserpine leading to an increase in intracellular cAMP and its internalization (PubMed:24587241). May play a role in locomotor activity through modulation of dopamine, NMDA and ADORA2A-induced locomotor activity. These behavioral changes are accompanied by modulation of the dopamine receptor signaling pathway in striatum (PubMed:24587241). Modulates…
818	Q9Y2T6	GPR55	GPCR	Tclin	G-protein coupled receptor 55		0.00428199	This gene belongs to the G-protein-coupled receptor superfamily. The encoded integral membrane protein is a likely cannabinoid receptor. It may be involved in several physiological and pathological processes by activating a variety of signal transduction pathways. [provided by RefSeq, Aug 2013]	160	343.204	0.5	May be involved in hyperalgesia associated with inflammatory and neuropathic pain (By similarity). Receptor for L-alpha-lysophosphatidylinositol (LPI). LPI induces Ca(2+) release from intracellular stores via the heterotrimeric G protein GNA13 and RHOA. Putative cannabinoid receptor. May play a role in bone physiology by regulating osteoclast number and function.
819	Q9BZJ8	GPR61	GPCR	Tbio	G-protein coupled receptor 61	group A	0.116497	This gene belongs to the G-protein coupled receptor 1 family. G protein-coupled receptors contain 7 transmembrane domains and transduce extracellular signals through heterotrimeric G proteins. The protein encoded by this gene is most closely related to biogenic amine receptors. [provided by RefSeq, Jul 2008]	171	12.054	1.64286	Orphan G-protein coupled receptor. Constitutively activates the G(s)-alpha/cAMP signaling pathway (PubMed:28827538). Shows a reciprocal regulatory interaction with the melatonin receptor MTNR1B most likely through receptor heteromerization (PubMed:28827538). May be involved in the regulation of food intake and body weight (By similarity).
820	Q9BZJ7	GPR62	GPCR	Tbio	G-protein coupled receptor 62	group A	0.434742		217	2.54478	0.142857	Orphan G-protein coupled receptor. Constitutively activates the G(q/11)/inositol phosphate and the G(s)-alpha/cAMP signaling pathways (PubMed:28827538). Has spontaneous activity for beta-arrestin recruitment (PubMed:28827538). Shows a reciprocal modulation of signaling functions with the melatonin receptor MTNR1B most likely through receptor heteromerization (PubMed:28827538).
821	Q9BZJ6	GPR63	GPCR	Tdark	Probable G-protein coupled receptor 63	group A	0.287595	This gene encodes a G protein-coupled receptor. Multiple alternatively spliced variants, encoding the same protein, have been identified. [provided by RefSeq, Dec 2011]	216	3.83425	0.142857	Orphan receptor. May play a role in brain function.
822	P46095	GPR6	GPCR	Tchem	G-protein coupled receptor 6	group A	0.0596434		102	23.1491	0.333333	Orphan receptor with constitutive G(s) signaling activity that activate cyclic AMP. Promotes neurite outgrowth and blocks myelin inhibition in neurons (By similarity).
823	O95800	GPR75	GPCR	Tbio	Probable G-protein coupled receptor 75	group A	0.116933	GPR75 is a member of the G protein-coupled receptor family. GPRs are cell surface receptors that activate guanine-nucleotide binding proteins upon the binding of a ligand.[supplied by OMIM, Jul 2002]	377	15.1538	0.25	G protein-coupled receptor that is activated by the chemokine CCL5/RANTES. Probably coupled to heterotrimeric Gq proteins, it stimulates inositol trisphosphate production and calcium mobilization upon activation. Together with CCL5/RANTES, may play a role in neuron survival through activation of a downstream signaling pathway involving the PI3, Akt and MAP kinases. CCL5/RANTES may also regulate i…
824	Q96P69	GPR78	GPCR	Tbio	G-protein coupled receptor 78	group A	0.05372	The protein encoded by this gene belongs to the G protein-coupled receptor family, which contain 7 transmembrane domains and transduce extracellular signals through heterotrimeric G proteins. This is an orphan receptor, which displays significant level of constitutive activity. Association analysis shows preliminary evidence for the involvement of this gene in susceptibility to bipolar affective …	189	17.0264	0.5	Orphan receptor. Displays a significant level of constitutive activity. Its effect is mediated by G(s)-alpha protein that stimulate adenylate cyclase, resulting in an elevation of intracellular cAMP.
825	Q96P67	GPR82	GPCR	Tdark	Probable G-protein coupled receptor 82	group A	0.396967	The protein encoded by this gene is an orphan G protein-coupled receptor of unknown function. The encoded protein is a member of a family of proteins that contain seven transmembrane domains and transduce extracellular signals through heterotrimeric G proteins. [provided by RefSeq, Sep 2011]	140	3.1686	0.090909	Orphan receptor.
826	Q9NYM4	GPR83	GPCR	Tbio	Probable G-protein coupled receptor 83		0.0355494		363	52.3969	1	Orphan receptor. Could be a neuropeptide Y receptor.
827	Q9NQS5	GPR84	GPCR	Tchem	G-protein coupled receptor 84		0.0236059		283	67.3591	0.666667	Receptor for medium-chain free fatty acid (FFA) with carbon chain lengths of C9 to C14. Capric acid (C10:0), undecanoic acid (C11:0) and lauric acid (C12:0) are the most potent agonists. Not activated by short-chain and long-chain saturated and unsaturated FFAs. Activation by medium-chain free fatty acid is coupled to a pertussis toxin sensitive G(i/o) protein pathway. May have important roles in…
828	P60893	GPR85	GPCR	Tbio	Probable G-protein coupled receptor 85	group A	0.0275573	Members of the G protein-coupled receptor (GPCR) family, such as GPR85, have a similar structure characterized by 7 transmembrane domains. Activation of GPCRs by extracellular stimuli, such as neurotransmitters, hormones, or light, induces an intracellular signaling cascade mediated by heterotrimeric GTP-binding proteins, or G proteins (Matsumoto et al., 2000 [PubMed 10833454]).[supplied by OMIM,…	153	45.226	1	Orphan receptor.
829	Q9BY21	GPR87	GPCR	Tchem	G-protein coupled receptor 87	group A	0.0601196	This gene encodes a G protein-coupled receptor and is located in a cluster of G protein-couple receptor genes on chromosome 3. The encoded protein has been shown to be overexpressed in lung squamous cell carcinoma (PMID:18057535) and regulated by p53 (PMID:19602589). [provided by RefSeq, Nov 2011]	225	26.3059	0.257576	Receptor for lysophosphatidic acid (LPA). Necessary for p53/TP53-dependent survival in response to DNA damage.
830	Q9GZN0	GPR88	GPCR	Tchem	Probable G-protein coupled receptor 88	group A	0.0296353	The protein encoded by this gene is a G protein-coupled receptor found almost exclusively in the striatum, a brain structure that controls motor function and cognition. Defects in this gene have been associated with chorea, speech delay, and learning difficulties, as well as some neuropsychiatric disorders. [provided by RefSeq, Mar 2017]	193	65.351	1	Probable G-protein coupled receptor implicated in a large repertoire of behavioral responses that engage motor activities, spatial learning, and emotional processing. May play a role in the regulation of cognitive and motor function.
845	P24046	GABRR1	Ion Channel	Tchem	Gamma-aminobutyric acid receptor subunit rho-1		0.0160148	GABA is the major inhibitory neurotransmitter in the mammalian brain where it acts at GABA receptors, which are ligand-gated chloride channels. GABRR1 is a member of the rho subunit family. Several transcript variants encoding different isoforms have been found for this gene. [provided by RefSeq, Feb 2012]	196	62.4299	0.125	GABA, the major inhibitory neurotransmitter in the vertebrate brain, mediates neuronal inhibition by binding to the GABA/benzodiazepine receptor and opening an integral chloride channel. Rho-1 GABA receptor could play a role in retinal neurotransmission.
899	P48546	GIPR	GPCR	Tchem	Gastric inhibitory polypeptide receptor	GPCR	0.00961809	This gene encodes a G-protein coupled receptor for gastric inhibitory polypeptide (GIP), which was originally identified as an activity in gut extracts that inhibited gastric acid secretion and gastrin release, but subsequently was demonstrated to stimulate insulin release in the presence of elevated glucose. Mice lacking this gene exhibit higher blood glucose levels with impaired initial insulin…	567	159.395	2	This is a receptor for GIP. The activity of this receptor is mediated by G proteins which activate adenylyl cyclase.	2QKH,4HJ0
916	P54756	EPHA5	Kinase	Tchem	Ephrin type-A receptor 5	Kinase	0.0114325	This gene belongs to the ephrin receptor subfamily of the protein-tyrosine kinase family. EPH and EPH-related receptors have been implicated in mediating developmental events, particularly in the nervous system. Receptors in the EPH subfamily typically have a single kinase domain and an extracellular region containing a Cys-rich domain and 2 fibronectin type III repeats. The ephrin receptors are …	487	183.434	0.090909	Receptor tyrosine kinase which binds promiscuously GPI-anchored ephrin-A family ligands residing on adjacent cells, leading to contact-dependent bidirectional signaling into neighboring cells. The signaling pathway downstream of the receptor is referred to as forward signaling while the signaling pathway downstream of the ephrin ligand is referred to as reverse signaling. Among GPI-anchored ephri…	2R2P,4ET7
921	O15197	EPHB6	Kinase	Tchem	Ephrin type-B receptor 6	Kinase	0.0231005	This gene encodes a member of a family of transmembrane proteins that function as receptors for ephrin-B family proteins. Unlike other members of this family, the encoded protein does not contain a functional kinase domain. Activity of this protein can influence cell adhesion and migration. Expression of this gene is downregulated during tumor progression, suggesting that the protein may suppress…	0	57.904	1	Kinase-defective receptor for members of the ephrin-B family. Binds to ephrin-B1 and ephrin-B2. Modulates cell adhesion and migration by exerting both positive and negative effects upon stimulation with ephrin-B2. Inhibits JNK activation, T-cell receptor-induced IL-2 secretion and CD25 expression upon stimulation with ephrin-B2.
923	P21860	ERBB3	Kinase	Tclin	Receptor tyrosine-protein kinase erbB-3	Kinase	0.000868	This gene encodes a member of the epidermal growth factor receptor (EGFR) family of receptor tyrosine kinases. This membrane-bound protein has a neuregulin binding domain but not an active kinase domain. It therefore can bind this ligand but not convey the signal into the cell through protein phosphorylation. However, it does form heterodimers with other EGF receptor family members which do have …	2081	1145.12	0.2	Tyrosine-protein kinase that plays an essential role as cell surface receptor for neuregulins. Binds to neuregulin-1 (NRG1) and is activated by it; ligand-binding increases phosphorylation on tyrosine residues and promotes its association with the p85 subunit of phosphatidylinositol 3-kinase (PubMed:20682778). May also be activated by CSPG5 (PubMed:15358134).	1M6B,2L9U,3KEX,3LMG,3P11,4LEO,4OTW,4P59,4RIW,4RIX,4RIY,5CUS,5O4O,5O7P
989	P04626	ERBB2	Kinase	Tclin	Receptor tyrosine-protein kinase erbB-2	Kinase	3.761e-05	This gene encodes a member of the epidermal growth factor (EGF) receptor family of receptor tyrosine kinases. This protein has no ligand binding domain of its own and therefore cannot bind growth factors. However, it does bind tightly to other ligand-bound EGF receptor family members to form a heterodimer, stabilizing ligand binding and enhancing kinase-mediated activation of downstream signallin…	5131	36767.8	0.2	Protein tyrosine kinase that is part of several cell surface receptor complexes, but that apparently needs a coreceptor for ligand binding. Essential component of a neuregulin-receptor complex, although neuregulins do not interact with it alone. GP30 is a potential ligand for this receptor. Regulates outgrowth and stabilization of peripheral microtubules (MTs). Upon ERBB2 activation, the MEMO1-RH…	1MFG,1MFL,1MW4,1N8Z,1OVC,1QR1,1S78,2A91,2JWA,2KS1,2L4K,2N2A,3BE1,3H3B,3MZW,3N85,3PP0,3RCD,3WLW,3WSQ,4GFU,4HRL,4HRM,4HRN,5K33,5KWG,5MY6,5O4G,5OB4,5TQS,6ATT
1000	A8MPY1	GABRR3	Ion Channel	Tbio	Gamma-aminobutyric acid receptor subunit rho-3	IC	0.0189043	The neurotransmitter gamma-aminobutyric acid (GABA) functions in the central nervous system to regulate synaptic transmission of neurons. This gene encodes one of three related subunits, which combine as homo- or hetero-pentamers to form GABA(C) receptors. In humans, some individuals contain a single-base polymorphism (dbSNP rs832032) that is predicted to inactivate the gene product. [provided by…	48	51.626	1	GABA, the major inhibitory neurotransmitter in the vertebrate brain, mediates neuronal inhibition by binding to the GABA/benzodiazepine receptor and opening an integral chloride channel.
1031	P14867	GABRA1	Ion Channel	Tclin	Gamma-aminobutyric acid receptor subunit alpha-1	IC	0.0094079	This gene encodes a gamma-aminobutyric acid (GABA) receptor. GABA is the major inhibitory neurotransmitter in the mammalian brain where it acts at GABA-A receptors, which are ligand-gated chloride channels. Chloride conductance of these channels can be modulated by agents such as benzodiazepines that bind to the GABA-A receptor. GABA-A receptors are pentameric, consisting of proteins from several…	442	123.173	1	Component of the heteropentameric receptor for GABA, the major inhibitory neurotransmitter in the vertebrate brain. Functions also as histamine receptor and mediates cellular responses to histamine. Functions as receptor for diazepines and various anesthetics, such as pentobarbital; these are bound at a separate allosteric effector binding site. Functions as ligand-gated chloride channel (By simi…	6CDU,6D1S,6D6T,6D6U
1035	O14764	GABRD	Ion Channel	Tclin	Gamma-aminobutyric acid receptor subunit delta	IC	0.0204242	Gamma-aminobutyric acid (GABA) is the major inhibitory neurotransmitter in the mammalian brain where it acts at GABA-A receptors, which are ligand-gated chloride channels. Chloride conductance of these channels can be modulated by agents such as benzodiazepines that bind to the GABA-A receptor. The GABA-A receptor is generally pentameric and there are five types of subunits: alpha, beta, gamma, d…	230	69.7377	1	GABA, the major inhibitory neurotransmitter in the vertebrate brain, mediates neuronal inhibition by binding to the GABA/benzodiazepine receptor and opening an integral chloride channel.
1036	Q99928	GABRG3	Ion Channel	Tclin	Gamma-aminobutyric acid receptor subunit gamma-3	IC	0.0420649	This gene encodes a gamma-aminobutyric acid (GABA) receptor. GABA is the major inhibitory neurotransmitter in the mammalian brain where it acts at GABA-A receptors, which are ligand-gated chloride channels. Chloride conductance of these channels can be modulated by agents such as benzodiazepines that bind to the GABA-A receptor. GABA-A receptors are pentameric, consisting of proteins from several…	98	24.0087	1	GABA, the major inhibitory neurotransmitter in the vertebrate brain, mediates neuronal inhibition by binding to the GABA/benzodiazepine receptor and opening an integral chloride channel.
1058	Q9HBU6	ETNK1	Kinase	Tbio	Ethanolamine kinase 1	Kinase	0.048178	This gene encodes an ethanolamine kinase, which functions in the first committed step of the phosphatidylethanolamine synthesis pathway. This cytosolic enzyme is specific for ethanolamine and exhibits negligible kinase activity on choline. Alternative splicing results in multiple transcript variants encoding distinct isoforms. [provided by RefSeq, Jul 2008]	198	32.4136	0.5	Highly specific for ethanolamine phosphorylation. May be a rate-controlling step in phosphatidylethanolamine biosynthesis.
1075	Q9NVF9	ETNK2	Kinase	Tbio	Ethanolamine kinase 2	Kinase	0.132256	The protein encoded by this gene is a member of choline/ethanolamine kinase family which catalyzes the first step of phosphatidylethanolamine (PtdEtn) biosynthesis via the cytidine diphosphate (CDP) ethanolamine pathway. Alternative splicing results in multiple transcript variants. [provided by RefSeq, Jul 2014]	156	9.40248	0.5	Highly specific for ethanolamine phosphorylation. Does not have choline kinase activity (By similarity).
1104	Q9Y463	DYRK1B	Kinase	Tchem	Dual specificity tyrosine-phosphorylation-regulated kinase 1B		0.0196093	This gene encodes a member of a family of nuclear-localized protein kinases. The encoded protein participates in the regulation of the cell cycle. Expression of this gene may be altered in tumor cells, and mutations in this gene were found to cause abdominal obesity-metabolic syndrome 3. Alternative splicing results in multiple transcript variants. [provided by RefSeq, Jun 2014]	336	78.9531	0.5	Dual-specificity kinase which possesses both serine/threonine and tyrosine kinase activities. Enhances the transcriptional activity of TCF1/HNF1A and FOXO1. Inhibits epithelial cell migration. Mediates colon carcinoma cell survival in mitogen-poor environments. Inhibits the SHH and WNT1 pathways, thereby enhancing adipogenesis. In addition, promotes expression of the gluconeogenic enzyme glucose-…
1107	Q92630	DYRK2	Kinase	Tchem	Dual specificity tyrosine-phosphorylation-regulated kinase 2		0.0172424	DYRK2 belongs to a family of protein kinases whose members are presumed to be involved in cellular growth and/or development. The family is defined by structural similarity of their kinase domains and their capability to autophosphorylate on tyrosine residues. DYRK2 has demonstrated tyrosine autophosphorylation and catalyzed phosphorylation of histones H3 and H2B in vitro. Two isoforms of DYRK2 h…	302	67.0272	0.333333	Serine/threonine-protein kinase involved in the regulation of the mitotic cell cycle, cell proliferation, apoptosis, organization of the cytoskeleton and neurite outgrowth. Functions in part via its role in ubiquitin-dependent proteasomal protein degradation. Functions downstream of ATM and phosphorylates p53/TP53 at 'Ser-46', and thereby contributes to the induction of apoptosis in response to D…	3K2L,3KVW,4AZF,5LXC,5LXD,5ZTN
1108	O43781	DYRK3	Kinase	Tchem	Dual specificity tyrosine-phosphorylation-regulated kinase 3		0.0456949	This gene product belongs to the DYRK family of dual-specificity protein kinases that catalyze autophosphorylation on serine/threonine and tyrosine residues. The members of this family share structural similarity, however, differ in their substrate specificity, suggesting their involvement in different cellular functions. The encoded protein has been shown to autophosphorylate on tyrosine residue…	219	33.2513	1.16667	Dual-specificity protein kinase that promotes disassembly of several types of membraneless organelles during mitosis, such as stress granules, nuclear speckles and pericentriolar material (PubMed:29973724). Dual-specificity tyrosine-regulated kinases (DYRKs) autophosphorylate a critical tyrosine residue in their activation loop and phosphorylate their substrate on serine and threonine residues (P…	5Y86
1109	Q9NR20	DYRK4	Kinase	Tchem	Dual specificity tyrosine-phosphorylation-regulated kinase 4		0.200459	This gene encodes an enzyme that belongs to a conserved family of serine/threonine protein kinases. Members of this dual specificity kinase family are thought to function in the regulation of cell differentiation and proliferation, survival, and in development. Alternate splicing results in multiple transcript variants. Additional alternatively spliced transcript variants of this gene have been d…	256	4.92535	0.25	Possible non-essential role in spermiogenesis.
1113	Q9BQI3	EIF2AK1	Kinase	Tchem	Eukaryotic translation initiation factor 2-alpha kinase 1	Kinase	0.0120707	The protein encoded by this gene acts at the level of translation initiation to downregulate protein synthesis in response to stress. The encoded protein is a kinase that can be inactivated by hemin. Two transcript variants encoding different isoforms have been found for this gene. [provided by RefSeq, Aug 2008]	288	81.4758	0.2	Inhibits protein synthesis at the translation initiation level, in response to various stress conditions, including oxidative stress, heme deficiency, osmotic shock and heat shock. Exerts its function through the phosphorylation of EIF2S1 at 'Ser-48' and 'Ser-51', thus preventing its recycling. Binds hemin forming a 1:1 complex through a cysteine thiolate and histidine nitrogenous coordination. T…
1114	P19525	EIF2AK2	Kinase	Tbio	Interferon-induced, double-stranded RNA-activated protein kinase	Kinase	0.00736681	The protein encoded by this gene is a serine/threonine protein kinase that is activated by autophosphorylation after binding to dsRNA. The activated form of the encoded protein can phosphorylate translation initiation factor EIF2S1, which in turn inhibits protein synthesis. This protein is also activated by manganese ions and heparin. Three transcript variants encoding two different isoforms have…	1083	163.05	1	IFN-induced dsRNA-dependent serine/threonine-protein kinase which plays a key role in the innate immune response to viral infection and is also involved in the regulation of signal transduction, apoptosis, cell proliferation and differentiation. Exerts its antiviral activity on a wide range of DNA and RNA viruses including hepatitis C virus (HCV), hepatitis B virus (HBV), measles virus (MV) and h…	1QU6,2A19,2A1A,3UIU
1117	Q9NZJ5	EIF2AK3	Kinase	Tchem	Eukaryotic translation initiation factor 2-alpha kinase 3	Kinase	0.00044559	The protein encoded by this gene phosphorylates the alpha subunit of eukaryotic translation-initiation factor 2, leading to its inactivation, and thus to a rapid reduction of translational initiation and repression of global protein synthesis. This protein is thought to modulate mitochondrial function. It is a type I membrane protein located in the endoplasmic reticulum (ER), where it is induced …	570	2031.15	0.5	Metabolic-stress sensing protein kinase that phosphorylates the alpha subunit of eukaryotic translation initiation factor 2 (eIF-2-alpha/EIF2S1) on 'Ser-52' during the unfolded protein response (UPR) and in response to low amino acid availability. Converts phosphorylated eIF-2-alpha/EIF2S1 either in a global protein synthesis inhibitor, leading to a reduced overall utilization of amino acids, or …	4G31,4G34,4M7I,4X7H,4X7J,4X7K,4X7L,4X7N,4X7O,4YZS,5SV7
1118	Q9P2K8	EIF2AK4	Kinase	Tchem	eIF-2-alpha kinase GCN2	Kinase	0.00241683	This gene encodes a member of a family of kinases that phosphorylate the alpha subunit of eukaryotic translation initiation factor-2 (EIF2), resulting in the downregulaton of protein synthesis. The encoded protein responds to amino acid deprivation by binding uncharged transfer RNAs. It may also be activated by glucose deprivation and viral infection. Mutations in this gene have been found in ind…	377	543.89	1	Metabolic-stress sensing protein kinase that phosphorylates the alpha subunit of eukaryotic translation initiation factor 2 (eIF-2-alpha/EIF2S1) on 'Ser-52' in response to low amino acid availability (PubMed:25329545). Plays a role as an activator of the integrated stress response (ISR) required for adapatation to amino acid starvation. Converts phosphorylated eIF-2-alpha/EIF2S1 either to a compe…
1273	Q09013	DMPK	Kinase	Tchem	Myotonin-protein kinase	Kinase	0.00242339	The protein encoded by this gene is a serine-threonine kinase that is closely related to other kinases that interact with members of the Rho family of small GTPases. Substrates for this enzyme include myogenin, the beta-subunit of the L-type calcium channels, and phospholemman. The 3' untranslated region of this gene contains 5-38 copies of a CTG trinucleotide repeat. Expansion of this unstable m…	280	425.555	0.25	Non-receptor serine/threonine protein kinase which is necessary for the maintenance of skeletal muscle structure and function. May play a role in myocyte differentiation and survival by regulating the integrity of the nuclear envelope and the expression of muscle-specific genes. May also phosphorylate PPP1R12A and inhibit the myosin phosphatase activity to regulate myosin phosphorylation. Also cr…	1WT6,2VD5
1282	Q8N1C3	GABRG1	Ion Channel	Tclin	Gamma-aminobutyric acid receptor subunit gamma-1		0.0421456	The protein encoded by this gene belongs to the ligand-gated ionic channel family. It is an integral membrane protein and plays an important role in inhibiting neurotransmission by binding to the benzodiazepine receptor and opening an integral chloride channel. This gene is clustered with three other family members on chromosome 4. [provided by RefSeq, Jul 2008]	126	22.699	0.5	GABA, the major inhibitory neurotransmitter in the vertebrate brain, mediates neuronal inhibition by binding to the GABA/benzodiazepine receptor and opening an integral chloride channel.
1283	P18507	GABRG2	Ion Channel	Tclin	Gamma-aminobutyric acid receptor subunit gamma-2	IC	0.00819163	This gene encodes a gamma-aminobutyric acid (GABA) receptor. GABA is the major inhibitory neurotransmitter in the mammlian brain, where it acts at GABA-A receptors, which are ligand-gated chloride channels. GABA-A receptors are pentameric, consisting of proteins from several subunit classes: alpha, beta, gamma, delta and rho. Mutations in this gene have been associated with epilepsy and febrile s…	360	156.307	0.333333	Component of the heteropentameric receptor for GABA, the major inhibitory neurotransmitter in the vertebrate brain. Functions also as histamine receptor and mediates cellular responses to histamine. Functions as receptor for diazepines and various anesthetics, such as pentobarbital; these are bound at a separate allosteric effector binding site. Functions as ligand-gated chloride channel.	6D6T,6D6U
1303	Q13627	DYRK1A	Kinase	Tchem	Dual specificity tyrosine-phosphorylation-regulated kinase 1A	Kinase	0.00226963	This gene encodes a member of the Dual-specificity tyrosine phosphorylation-regulated kinase (DYRK) family. This member contains a nuclear targeting signal sequence, a protein kinase domain, a leucine zipper motif, and a highly conservative 13-consecutive-histidine repeat. It catalyzes its autophosphorylation on serine/threonine and tyrosine residues. It may play a significant role in a signaling…	392	656.314	1	Dual-specificity kinase which possesses both serine/threonine and tyrosine kinase activities. May play a role in a signaling pathway regulating nuclear functions of cell proliferation. Modulates alternative splicing by phosphorylating the splice factor SRSF6 (By similarity). Exhibits a substrate preference for proline at position P+1 and arginine at position P-3. Has pro-survival function and neg…	2VX3,2WO6,3ANQ,3ANR,4AZE,4MQ1,4MQ2,4NCT,4YLJ,4YLK,4YLL,4YU2,5A3X,5A4E,5A4L,5A4Q,5A4T,5A54,5AIK,6A1F,6A1G,6EIF,6EIJ,6EIL,6EIP,6EIQ,6EIR,6EIS,6EIV,6EJ4
1309	P34903	GABRA3	Ion Channel	Tclin	Gamma-aminobutyric acid receptor subunit alpha-3	IC	0.0218009	GABA is the major inhibitory neurotransmitter in the mammalian brain where it acts at GABA-A receptors, which are ligand-gated chloride channels. Chloride conductance of these channels can be modulated by agents such as benzodiazepines that bind to the GABA-A receptor. At least 16 distinct subunits of GABA-A receptors have been identified. [provided by RefSeq, Jul 2008]	200	53.5713	1	GABA, the major inhibitory neurotransmitter in the vertebrate brain, mediates neuronal inhibition by binding to the GABA/benzodiazepine receptor and opening an integral chloride channel.
1311	P48169	GABRA4	Ion Channel	Tclin	Gamma-aminobutyric acid receptor subunit alpha-4	IC	0.030899	Gamma-aminobutyric acid (GABA) is the major inhibitory neurotransmitter in the mammalian brain where it acts at GABA-A receptors, which are ligand-gated chloride channels. Chloride conductance of these channels can be modulated by agents such as benzodiazepines that bind to the GABA-A receptor. At least 16 distinct subunits of GABA-A receptors have been identified. This gene encodes subunit alpha…	373	39.4471	1	GABA, the major inhibitory neurotransmitter in the vertebrate brain, mediates neuronal inhibition by binding to the GABA/benzodiazepine receptor and opening an integral chloride channel.
1313	P31644	GABRA5	Ion Channel	Tclin	Gamma-aminobutyric acid receptor subunit alpha-5		0.0149971	GABA is the major inhibitory neurotransmitter in the mammalian brain where it acts at GABA-A receptors, which are ligand-gated chloride channels. Chloride conductance of these channels can be modulated by agents such as benzodiazepines that bind to the GABA-A receptor. At least 16 distinct subunits of GABA-A receptors have been identified. Transcript variants utilizing three different alternative…	304	74.6982	1	GABA, the major inhibitory neurotransmitter in the vertebrate brain, mediates neuronal inhibition by binding to the GABA/benzodiazepine receptor and opening an integral chloride channel.	5O8F,5OJM,6A96
1315	P18505	GABRB1	Ion Channel	Tclin	Gamma-aminobutyric acid receptor subunit beta-1	IC	0.0289557	The gamma-aminobutyric acid (GABA) A receptor is a multisubunit chloride channel that mediates the fastest inhibitory synaptic transmission in the central nervous system. This gene encodes GABA A receptor, beta 1 subunit. It is mapped to chromosome 4p12 in a cluster comprised of genes encoding alpha 4, alpha 2 and gamma 1 subunits of the GABA A receptor. Alteration of this gene is implicated in t…	417	37.1341	2	Component of the heteropentameric receptor for GABA, the major inhibitory neurotransmitter in the vertebrate brain. Functions also as histamine receptor and mediates cellular responses to histamine. Functions as receptor for diazepines and various anesthetics, such as pentobarbital; these are bound at a separate allosteric effector binding site. Functions as ligand-gated chloride channel.
1316	P28472	GABRB3	Ion Channel	Tclin	Gamma-aminobutyric acid receptor subunit beta-3	IC	0.00485997	This gene encodes a member of the ligand-gated ionic channel family. The encoded protein is one the subunits of a multi-subunit chloride channel that serves as the receptor for gamma-aminobutyric acid, a major inhibitory neurotransmitter of the mammalian nervous system. This gene is located on the long arm of chromosome 15 in a cluster with two other genes encoding related subunits of the family.…	306	242.946	1.2	Component of the heteropentameric receptor for GABA, the major inhibitory neurotransmitter in the vertebrate brain. Functions also as histamine receptor and mediates cellular responses to histamine. Functions as receptor for diazepines and various anesthetics, such as pentobarbital; these are bound at a separate allosteric effector binding site. Functions as ligand-gated chloride channel.	4COF,5O8F,5OJM,6A96
1320	O00591	GABRP	Ion Channel	Tclin	Gamma-aminobutyric acid receptor subunit pi		0.0621086	The gamma-aminobutyric acid (GABA) A receptor is a multisubunit chloride channel that mediates the fastest inhibitory synaptic transmission in the central nervous system. The subunit encoded by this gene is expressed in several non-neuronal tissues including the uterus and ovaries. This subunit can assemble with known GABA A receptor subunits, and the presence of this subunit alters the sensitivi…	86	23.1792	1.91212	GABA, the major inhibitory neurotransmitter in the vertebrate brain, mediates neuronal inhibition by binding to the GABA/benzodiazepine receptor and opening an integral chloride channel. In the uterus, the function of the receptor appears to be related to tissue contractility. The binding of this pI subunit with other GABA(A) receptor subunits alters the sensitivity of recombinant receptors to mo…
1323	Q9UN88	GABRQ	Ion Channel	Tclin	Gamma-aminobutyric acid receptor subunit theta	IC	0.122212	The gamma-aminobutyric acid (GABA) A receptor is a multisubunit chloride channel that mediates the fastest inhibitory synaptic transmission in the central nervous system. This gene encodes the theta subunit of the GABA A receptor. The gene is mapped to chromosome Xq28 in a cluster of genes including those that encode the alpha 3 and epsilon subunits of the GABA A receptor. [provided by RefSeq, Ju…	92	12.5396	0.125	GABA, the major inhibitory neurotransmitter in the vertebrate brain, mediates neuronal inhibition by binding to the GABA/benzodiazepine receptor and opening an integral chloride channel.
1336	Q8N568	DCLK2	Kinase	Tchem	Serine/threonine-protein kinase DCLK2	Kinase	0.0731754	This gene encodes a member of the protein kinase superfamily and the doublecortin family. The protein encoded by this gene contains two N-terminal doublecortin domains, which bind microtubules and regulate microtubule polymerization, a C-terminal serine/threonine protein kinase domain, which shows substantial homology to Ca2+/calmodulin-dependent protein kinase, and a serine/proline-rich domain i…	167	21.7313	0.5	Protein kinase with a significantly reduced C(a2+)/CAM affinity and dependence compared to other members of the CaMK family. May play a role in the down-regulation of CRE-dependent gene activation probably by phosphorylation of the CREB coactivator CRTC2/TORC2 and the resulting retention of TORC2 in the cytoplasm (By similarity).
1337	P27707	DCK	Kinase	Tchem	Deoxycytidine kinase	Kinase	0.00201831	Deoxycytidine kinase (DCK) is required for the phosphorylation of several deoxyribonucleosides and their nucleoside analogs. Deficiency of DCK is associated with resistance to antiviral and anticancer chemotherapeutic agents. Conversely, increased deoxycytidine kinase activity is associated with increased activation of these compounds to cytotoxic nucleoside triphosphate derivatives. DCK is clini…	554	620.087	1	Required for the phosphorylation of the deoxyribonucleosides deoxycytidine (dC), deoxyguanosine (dG) and deoxyadenosine (dA). Has broad substrate specificity, and does not display selectivity based on the chirality of the substrate. It is also an essential enzyme for the phosphorylation of numerous nucleoside analogs widely employed as antiviral and chemotherapeutic agents.	1P5Z,1P60,1P61,1P62,2A2Z,2A30,2A7Q,2NO0,2NO1,2NO6,2NO7,2NO9,2NOA,2QRN,2QRO,2ZI3,2ZI4,2ZI5,2ZI6,2ZI7,2ZI9,2ZIA,3HP1,3IPX,3IPY,3KFX,3MJR,3QEJ,3QEN,3QEO,4JLJ,4JLK,4JLM,4JLN,4KCG,4L5B,4Q18,4Q19,4Q1A,4Q1B,4Q1C,4Q1D,4Q1E,4Q1F,5MQJ,5MQL,5MQT
1342	Q16832	DDR2	Kinase	Tchem	Discoidin domain-containing receptor 2	Kinase	0.00358332	This gene encodes a member of the discoidin domain receptor subclass of the receptor tyrosine kinase (RTKs) protein family. RTKs play a key role in the communication of cells with their microenvironment. The encoded protein is a collagen-induced receptor that activates signal transduction pathways involved in cell adhesion, proliferation, and extracellular matrix remodeling. This protein is expre…	400	387.377	0.2	Tyrosine kinase that functions as cell surface receptor for fibrillar collagen and regulates cell differentiation, remodeling of the extracellular matrix, cell migration and cell proliferation. Required for normal bone development. Regulates osteoblast differentiation and chondrocyte maturation via a signaling pathway that involves MAP kinases and leads to the activation of the transcription fact…	2WUH,2Z4F
1344	Q16854	DGUOK	Kinase	Tbio	Deoxyguanosine kinase, mitochondrial	Kinase	0.00897987	In mammalian cells, the phosphorylation of purine deoxyribonucleosides is mediated predominantly by two deoxyribonucleoside kinases, cytosolic deoxycytidine kinase and mitochondrial deoxyguanosine kinase. The protein encoded by this gene is responsible for phosphorylation of purine deoxyribonucleosides in the mitochondrial matrix. In addition, this protein phosphorylates several purine deoxyribon…	198	129.235	0.2	Phosphorylates deoxyguanosine and deoxyadenosine in the mitochondrial matrix, with the highest efficiency for deoxyguanosine. In non-replicating cells, where cytosolic dNTP synthesis is down-regulated, mtDNA synthesis depends solely on DGUOK and TK2. Phosphorylates certain nucleoside analogs. Widely used as target of antiviral and chemotherapeutic agents.	2OCP
1365	P78334	GABRE	Ion Channel	Tclin	Gamma-aminobutyric acid receptor subunit epsilon	IC	0.0381454	The product of this gene belongs to the ligand-gated ionic channel (TC 1.A.9) family. It encodes the gamma-aminobutyric acid (GABA) A receptor which is a multisubunit chloride channel that mediates the fastest inhibitory synaptic transmission in the central nervous system. This gene encodes an epsilon subunit. It is mapped to chromosome Xq28 in a cluster comprised of genes encoding alpha 3, beta …	212	30.979	0.125	GABA, the major inhibitory neurotransmitter in the vertebrate brain, mediates neuronal inhibition by binding to the GABA/benzodiazepine receptor and opening an integral chloride channel.
1369	P28476	GABRR2	Ion Channel	Tchem	Gamma-aminobutyric acid receptor subunit rho-2	IC	0.0165191	Gamma-aminobutyric acid (GABA) is the major inhibitory neurotransmitter in the mammalian brain where it acts at GABA receptors, which are ligand-gated chloride channels. The protein encoded by this gene is a member of the rho subunit family and is a component of the GABA type A receptor complex. This gene exists on chromosome 6q next to the gene encoding the rho 1 subunit of the GABA type A recep…	113	58.54	0.125	GABA, the major inhibitory neurotransmitter in the vertebrate brain, mediates neuronal inhibition by binding to the GABA/benzodiazepine receptor and opening an integral chloride channel. Rho-2 GABA receptor could play a role in retinal neurotransmission.
1371	Q6XUX3	DSTYK	Kinase	Tchem	Dual serine/threonine and tyrosine protein kinase		0.120499	This gene encodes a dual serine/threonine and tyrosine protein kinase which is expressed in multiple tissues. It is thought to function as a regulator of cell death. Multiple transcript variants encoding different isoforms have been found for this gene. [provided by RefSeq, Dec 2008]	166	13.2081	0.5	Acts as a positive regulator of ERK phosphorylation downstream of fibroblast growth factor-receptor activation (PubMed:23862974, PubMed:28157540). Involved in the regulation of both caspase-dependent apoptosis and caspase-independent cell death (PubMed:15178406). In the skin, it plays a predominant role in suppressing caspase-dependent apoptosis in response to UV stress in a range of dermal cell …
1440	O60825	PFKFB2	Kinase	Tchem	6-phosphofructo-2-kinase/fructose-2,6-bisphosphatase 2	Kinase	0.0160378	The protein encoded by this gene is involved in both the synthesis and degradation of fructose-2,6-bisphosphate, a regulatory molecule that controls glycolysis in eukaryotes. The encoded protein has a 6-phosphofructo-2-kinase activity that catalyzes the synthesis of fructose-2,6-bisphosphate, and a fructose-2,6-biphosphatase activity that catalyzes the degradation of fructose-2,6-bisphosphate. Th…	393	71.3818	0.333333	Synthesis and degradation of fructose 2,6-bisphosphate.	5HTK
1477	P21709	EPHA1	Kinase	Tchem	Ephrin type-A receptor 1	Kinase	0.00136672	This gene belongs to the ephrin receptor subfamily of the protein-tyrosine kinase family. EPH and EPH-related receptors have been implicated in mediating developmental events, particularly in the nervous system. Receptors in the EPH subfamily typically have a single kinase domain and an extracellular region containing a Cys-rich domain and 2 fibronectin type III repeats. The ephrin receptors are …	539	752.984	1	Receptor tyrosine kinase which binds promiscuously membrane-bound ephrin-A family ligands residing on adjacent cells, leading to contact-dependent bidirectional signaling into neighboring cells. The signaling pathway downstream of the receptor is referred to as forward signaling while the signaling pathway downstream of the ephrin ligand is referred to as reverse signaling. Binds with a low affin…	2K1K,2K1L,3HIL,3KKA
1547	P16118	PFKFB1	Kinase	Tbio	6-phosphofructo-2-kinase/fructose-2,6-bisphosphatase 1	Kinase	0.0340022	This gene encodes a member of the family of bifunctional 6-phosphofructo-2-kinase:fructose-2,6-biphosphatase enzymes. The enzyme forms a homodimer that catalyzes both the synthesis and degradation of fructose-2,6-biphosphate using independent catalytic domains. Fructose-2,6-biphosphate is an activator of the glycolysis pathway and an inhibitor of the gluconeogenesis pathway. Consequently, regulat…	240	25.1812	1	Synthesis and degradation of fructose 2,6-bisphosphate.	1K6M
1639	P00533	EGFR	Kinase	Tclin	Epidermal growth factor receptor	Kinase	7.274e-05	The protein encoded by this gene is a transmembrane glycoprotein that is a member of the protein kinase superfamily. This protein is a receptor for members of the epidermal growth factor family. EGFR is a cell surface protein that binds to epidermal growth factor. Binding of the protein to a ligand induces receptor dimerization and tyrosine autophosphorylation and leads to cell proliferation. Mut…	8544	19716	0.2	Receptor tyrosine kinase binding ligands of the EGF family and activating several signaling cascades to convert extracellular cues into appropriate cellular responses (PubMed:2790960, PubMed:10805725, PubMed:27153536). Known ligands include EGF, TGFA/TGF-alpha, AREG, epigen/EPGN, BTC/betacellulin, epiregulin/EREG and HBEGF/heparin-binding EGF (PubMed:2790960, PubMed:7679104, PubMed:8144591, PubMe…	1DNQ,1DNR,1IVO,1M14,1M17,1MOX,1NQL,1XKK,1YY9,1Z9I,2EB2,2EB3,2EXP,2EXQ,2GS2,2GS6,2GS7,2ITN,2ITO,2ITP,2ITQ,2ITT,2ITU,2ITV,2ITW,2ITX,2ITY,2ITZ,2J5E,2J5F,2J6M,2JIT,2JIU,2JIV,2KS1,2M0B,2M20,2N5S,2RF9,2RFD,2RFE,2RGP,3B2U,3B2V,3BEL,3BUO,3C09,3G5V,3G5Y,3GOP,3GT8,3IKA,3LZB,3NJP,3OB2,3OP0,3P0Y,3PFV,3POZ,3QWQ,3UG1,3UG2,3VJN,3VJO,3VRP,3VRR,3W2O,3W2P,3W2Q,3W2R,3W2S,3W32,3W33,4G5J,4G5P,4HJO,4I1Z,4I20,4I21,4I22…
1729	Q16875	PFKFB3	Kinase	Tchem	6-phosphofructo-2-kinase/fructose-2,6-bisphosphatase 3	Kinase	0.00333471	The protein encoded by this gene belongs to a family of bifunctional proteins that are involved in both the synthesis and degradation of fructose-2,6-bisphosphate, a regulatory molecule that controls glycolysis in eukaryotes. The encoded protein has a 6-phosphofructo-2-kinase activity that catalyzes the synthesis of fructose-2,6-bisphosphate (F2,6BP), and a fructose-2,6-biphosphatase activity tha…	290	417.263	0.333333	Synthesis and degradation of fructose 2,6-bisphosphate.	2AXN,2DWO,2DWP,2I1V,3QPU,3QPV,3QPW,4D4J,4D4K,4D4L,4D4M,4MA4,5AJV,5AJW,5AJX,5AJY,5AJZ,5AK0
1760	Q05397	PTK2	Kinase	Tclin	Focal adhesion kinase 1	Kinase	0.00066622	This gene encodes a cytoplasmic protein tyrosine kinase which is found concentrated in the focal adhesions that form between cells growing in the presence of extracellular matrix constituents. The encoded protein is a member of the FAK subfamily of protein tyrosine kinases but lacks significant sequence similarity to kinases from other subfamilies. Activation of this gene may be an important earl…	2638	1491.49	0.2	Non-receptor protein-tyrosine kinase that plays an essential role in regulating cell migration, adhesion, spreading, reorganization of the actin cytoskeleton, formation and disassembly of focal adhesions and cell protrusions, cell cycle progression, cell proliferation and apoptosis. Required for early embryonic development and placenta development. Required for embryonic angiogenesis, normal card…	1K04,1K05,1MP8,1OW6,1OW7,1OW8,2ETM,2IJM,3B71,3BZ3,3PXK,3S9O,4EBV,4EBW,4GU6,4GU9,4I4E,4I4F,4K8A,4K9Y,4KAB,4KAO,4NY0,4Q9S
1767	P29320	EPHA3	Kinase	Tchem	Ephrin type-A receptor 3	Kinase	0.00466013	This gene belongs to the ephrin receptor subfamily of the protein-tyrosine kinase family. EPH and EPH-related receptors have been implicated in mediating developmental events, particularly in the nervous system. Receptors in the EPH subfamily typically have a single kinase domain and an extracellular region containing a Cys-rich domain and 2 fibronectin type III repeats. The ephrin receptors are …	457	339.618	0.333333	Receptor tyrosine kinase which binds promiscuously membrane-bound ephrin family ligands residing on adjacent cells, leading to contact-dependent bidirectional signaling into neighboring cells. The signaling pathway downstream of the receptor is referred to as forward signaling while the signaling pathway downstream of the ephrin ligand is referred to as reverse signaling. Highly promiscuous for e…	2GSF,2QO2,2QO7,2QO9,2QOB,2QOC,2QOD,2QOF,2QOI,2QOK,2QOL,2QON,2QOO,2QOQ,3DZQ,3FXX,3FY2,4G2F,4GK2,4GK3,4GK4,4L0P,4P4C,4P5Q,4P5Z,4TWN,4TWO
1946	O14578	CIT	Kinase	Tchem	Citron Rho-interacting kinase	Kinase	0.0409472	This gene encodes a serine/threonine-protein kinase that functions in cell division. Together with the kinesin KIF14, this protein localizes to the central spindle and midbody, and functions to promote efficient cytokinesis. This protein is involved in central nervous system development. Polymorphisms in this gene are associated with bipolar disorder and risk for schizophrenia. Alternative splici…	163	29.7883	1	Plays a role in cytokinesis. Required for KIF14 localization to the central spindle and midbody. Putative RHO/RAC effector that binds to the GTP-bound forms of RHO and RAC1. It probably binds p21 with a tighter specificity in vivo. Displays serine/threonine protein kinase activity. Plays an important role in the regulation of cytokinesis and the development of the central nervous system. Phosphor…
1958	Q13324	CRHR2	GPCR	Tchem	Corticotropin-releasing factor receptor 2	GPCR	0.00245379	The protein encoded by this gene belongs to the G-protein coupled receptor 2 family, and the subfamily of corticotropin releasing hormone receptor. This receptor shows high affinity for corticotropin releasing hormone (CRH), and also binds CRH-related peptides such as urocortin. CRH is synthesized in the hypothalamus, and plays an important role in coordinating the endocrine, autonomic, and behav…	598	466.231	0.333333	G-protein coupled receptor for CRH (corticotropin-releasing factor), UCN (urocortin), UCN2 and UCN3. Has high affinity for UCN. Ligand binding causes a conformation change that triggers signaling via guanine nucleotide-binding proteins (G proteins) and down-stream effectors, such as adenylate cyclase. Promotes the activation of adenylate cyclase, leading to increased intracellular cAMP levels.	3N93,3N95,3N96
1968	Q9P1W3	TMEM63C	Ion Channel	Tbio	Calcium permeable stress-gated cation channel 1		0.0284925		23	44.9909	1	Acts as an osmosensitive calcium-permeable cation channel.
1969	P07333	CSF1R	Kinase	Tclin	Macrophage colony-stimulating factor 1 receptor	Kinase	0.00064143	The protein encoded by this gene is the receptor for colony stimulating factor 1, a cytokine which controls the production, differentiation, and function of macrophages. This receptor mediates most if not all of the biological effects of this cytokine. Ligand binding activates the receptor kinase through a process of oligomerization and transphosphorylation. The encoded protein is a tyrosine kina…	1631	1793.69	0.5	Tyrosine-protein kinase that acts as cell-surface receptor for CSF1 and IL34 and plays an essential role in the regulation of survival, proliferation and differentiation of hematopoietic precursor cells, especially mononuclear phagocytes, such as macrophages and monocytes. Promotes the release of proinflammatory chemokines in response to IL34 and CSF1, and thereby plays an important role in innat…	2I0V,2I0Y,2I1M,2OGV,3BEA,3DPK,3KRJ,3KRL,3LCD,3LCO,4DKD,4HW7,4LIQ,4R7H,4R7I,4WRL,4WRM
1971	P19784	CSNK2A2	Kinase	Tchem	Casein kinase II subunit alpha'		0.00231447	This gene encodes the alpha', or alpha 2, catalytic subunit of the protein kinase enzyme, casein kinase 2 (CK2). Casein kinase 2 is a serine/threonine protein kinase that phosphorylates acidic proteins such as casein. It is involved in various cellular processes, including cell cycle control, apoptosis, and circadian rhythms. This heterotetrameric kinase includes two catalytic subunits, either al…	296	528.19	2.16667	Catalytic subunit of a constitutively active serine/threonine-protein kinase complex that phosphorylates a large number of substrates containing acidic residues C-terminal to the phosphorylated serine or threonine. Regulates numerous cellular processes, such as cell cycle progression, apoptosis and transcription, as well as viral infection. May act as a regulatory node which integrates and coordi…	3E3B,3OFM,3U87,5M4U,5M56,5OOI,5Y9M,5YF9
2103	O43293	DAPK3	Kinase	Tchem	Death-associated protein kinase 3	Kinase	0.0155149	Death-associated protein kinase 3 (DAPK3) induces morphological changes in apoptosis when overexpressed in mammalian cells. These results suggest that DAPK3 may play a role in the induction of apoptosis. [provided by RefSeq, Jul 2008]	368	80.1541	0.25	Serine/threonine kinase which is involved in the regulation of apoptosis, autophagy, transcription, translation and actin cytoskeleton reorganization. Involved in the regulation of smooth muscle contraction. Regulates both type I (caspase-dependent) apoptotic and type II (caspase-independent) autophagic cell deaths signal, depending on the cellular setting. Involved in regulation of starvation-in…	1YRP,2J90,3BHY,3BQR,5A6N,5A6O,5VJA
2179	P41597	CCR2	GPCR	Tchem	C-C chemokine receptor type 2	GPCR	0.0006525	The protein encoded by this gene is a receptor for monocyte chemoattractant protein-1, a chemokine which specifically mediates monocyte chemotaxis. Monocyte chemoattractant protein-1 is involved in monocyte infiltration in inflammatory diseases such as rheumatoid arthritis as well as in the inflammatory response against tumors. The encoded protein mediates agonist-dependent calcium mobilization a…	800	1762.59	0.166667	Receptor for the CCL2, CCL7 and CCL13 chemokines (PubMed:23408426). Receptor for the beta-defensin DEFB106A/DEFB106B (PubMed:23938203). Transduces a signal by increasing intracellular calcium ion levels (By similarity). Upon CCL2 ligation, mediates chemotaxis and migration induction through the activation of the PI3K cascade, the small G protein Rac and lamellipodium protrusion (Probable).	1KAD,1KP1,2MLO,2MLQ,5T1A
2201	P50750	CDK9	Kinase	Tchem	Cyclin-dependent kinase 9	Kinase	0.00210218	The protein encoded by this gene is a member of the cyclin-dependent protein kinase (CDK) family. CDK family members are highly similar to the gene products of S. cerevisiae cdc28, and S. pombe cdc2, and known as important cell cycle regulators. This kinase was found to be a component of the multiprotein complex TAK/P-TEFb, which is an elongation factor for RNA polymerase II-directed transcriptio…	503	595.459	0.2	Protein kinase involved in the regulation of transcription. Member of the cyclin-dependent kinase pair (CDK9/cyclin-T) complex, also called positive transcription elongation factor b (P-TEFb), which facilitates the transition from abortive to productive elongation by phosphorylating the CTD (C-terminal domain) of the large subunit of RNA polymerase II (RNAP II) POLR2A, SUPT5H and RDBP. This compl…	1PF6,3BLH,3BLQ,3BLR,3LQ5,3MI9,3MIA,3MY1,3TN8,3TNH,3TNI,4BCF,4BCG,4BCH,4BCI,4BCJ,4EC8,4EC9,4IMY,4OGR,4OR5,5L1Z,6GZH
2203	Q00536	CDK16	Kinase	Tchem	Cyclin-dependent kinase 16		0.0257968	The protein encoded by this gene belongs to the cdc2/cdkx subfamily of the ser/thr family of protein kinases. It may play a role in signal transduction cascades in terminally differentiated cells; in exocytosis; and in transport of secretory cargo from the endoplasmic reticulum. This gene is thought to escape X inactivation. Alternative splicing results in multiple transcript variants encoding di…	202	56.7873	0.333333	Protein kinase that plays a role in vesicle-mediated transport processes and exocytosis. Regulates GH1 release by brain neurons. Phosphorylates NSF, and thereby regulates NSF oligomerization. Required for normal spermatogenesis. Regulates neuron differentiation and dendrite development (By similarity). Plays a role in the regulation of insulin secretion in response to changes in blood glucose lev…	3MTL,5G6V
2223	O95180	CACNA1H	Ion Channel	Tclin	Voltage-dependent T-type calcium channel subunit alpha-1H	IC	0.00342394	This gene encodes a T-type member of the alpha-1 subunit family, a protein in the voltage-dependent calcium channel complex. Calcium channels mediate the influx of calcium ions into the cell upon membrane polarization and consist of a complex of alpha-1, alpha-2/delta, beta, and gamma subunits in a 1:1:1:1 ratio. The alpha-1 subunit has 24 transmembrane segments and forms the pore through which i…	268	391.398	1	Voltage-sensitive calcium channel that gives rise to T-type calcium currents. T-type calcium channels belong to the "low-voltage activated (LVA)" group. A particularity of this type of channel is an opening at quite negative potentials, and a voltage-dependent inactivation (PubMed:9670923, PubMed:9930755, PubMed:27149520). T-type channels serve pacemaking functions in both central neurons and car…
2224	O00555	CACNA1A	Ion Channel	Tchem	Voltage-dependent P/Q-type calcium channel subunit alpha-1A	IC	0.00069217	Voltage-dependent calcium channels mediate the entry of calcium ions into excitable cells, and are also involved in a variety of calcium-dependent processes, including muscle contraction, hormone or neurotransmitter release, and gene expression. Calcium channels are multisubunit complexes composed of alpha-1, beta, alpha-2/delta, and gamma subunits. The channel activity is directed by the pore-fo…	76	1835.2	0.25	Voltage-sensitive calcium channels (VSCC) mediate the entry of calcium ions into excitable cells and are also involved in a variety of calcium-dependent processes, including muscle contraction, hormone or neurotransmitter release, gene expression, cell motility, cell division and cell death. The isoform alpha-1A gives rise to P and/or Q-type calcium currents. P/Q-type calcium channels belong to t…	3BXK
2259	Q9Y698	CACNG2	Ion Channel	Tbio	Voltage-dependent calcium channel gamma-2 subunit	IC	0.00808502	The protein encoded by this gene is a type I transmembrane AMPA receptor regulatory protein (TARP). TARPs regulate both trafficking and channel gating of the AMPA receptors. The AMPA subtype of ionotropic glutamate receptors are ligand gated ion channels that are typically activated by glutamate released from presynaptic neuron terminals and mediate fast neurotransmission in excitatory synapses. …	214	126.155	1.5	Regulates the trafficking and gating properties of AMPA-selective glutamate receptors (AMPARs). Promotes their targeting to the cell membrane and synapses and modulates their gating properties by slowing their rates of activation, deactivation and desensitization. Does not show subunit-specific AMPA receptor regulation and regulates all AMPAR subunits. Thought to stabilize the calcium channel in …	6DLZ,6DM0,6DM1,6DM2
2262	P32238	CCKAR	GPCR	Tclin	Cholecystokinin receptor type A	GPCR	0.00152339	This gene encodes a G-protein coupled receptor that binds non-sulfated members of the cholecystokinin (CCK) family of peptide hormones. This receptor is a major physiologic mediator of pancreatic enzyme secretion and smooth muscle contraction of the gallbladder and stomach. In the central and peripheral nervous system this receptor regulates satiety and the release of beta-endorphin and dopamine.…	412	625.533	0.2	Receptor for cholecystokinin. Mediates pancreatic growth and enzyme secretion, smooth muscle contraction of the gall bladder and stomach. Has a 1000-fold higher affinity for CCK rather than for gastrin. It modulates feeding and dopamine-induced behavior in the central and peripheral nervous system. This receptor mediates its action by association with G proteins that activate a phosphatidylinosit…	1D6G,1HZN,1PB2
2267	P32248	CCR7	GPCR	Tchem	C-C chemokine receptor type 7	GPCR	0.00084453	The protein encoded by this gene is a member of the G protein-coupled receptor family. This receptor was identified as a gene induced by the Epstein-Barr virus (EBV), and is thought to be a mediator of EBV effects on B lymphocytes. This receptor is expressed in various lymphoid tissues and activates B and T lymphocytes. It has been shown to control the migration of memory T cells to inflamed tiss…	969	1320.35	0.5	Receptor for the MIP-3-beta chemokine. Probable mediator of EBV effects on B-lymphocytes or of normal lymphocyte functions.
2273	Q8IVW4	CDKL3	Kinase	Tchem	Cyclin-dependent kinase-like 3		0.156636	The protein encoded by this gene is a member of cyclin-dependent protein kinase (CDK) family. CDK family members are highly similar to the gene products of Saccharomyces cerevisiae cdc28, and Schizosaccharomyces pombe cdc2, and are known to be important regulators of cell cycle progression. This gene was identified as a gene absent in leukemic patients with chromosome 5q deletion. This loss may b…	182	14.0153	1		3ZDU
2274	Q5MAI5	CDKL4	Kinase	Tdark	Cyclin-dependent kinase-like 4		1.22013		177	1.18938	1
2275	O76039	CDKL5	Kinase	Tchem	Cyclin-dependent kinase-like 5		0.00444062	This gene is a member of Ser/Thr protein kinase family and encodes a phosphorylated protein with protein kinase activity. Mutations in this gene have been associated with X-linked infantile spasm syndrome (ISSX), also known as X-linked West syndrome, and Rett syndrome (RTT). Alternate transcriptional splice variants have been characterized. [provided by RefSeq, Jul 2008]	216	319.429	1	Mediates phosphorylation of MECP2 (PubMed:15917271, PubMed:16935860). May regulate ciliogenesis (PubMed:29420175).	4BGQ
2316	P51679	CCR4	GPCR	Tclin	C-C chemokine receptor type 4	GPCR	0.0107493	The protein encoded by this gene belongs to the G-protein-coupled receptor family . It is a receptor for the CC chemokine - MIP-1, RANTES, TARC and MCP-1. Chemokines are a group of small polypeptide, structurally related molecules that regulate cell trafficking of various types of leukocytes. The chemokines also play fundamental roles in the development, homeostasis, and function of the immune sy…	696	93.3101	0.083333	High affinity receptor for the C-C type chemokines CCL17/TARC, CCL22/MDC and CKLF isoform 1/CKLF1. The activity of this receptor is mediated by G(i) proteins which activate a phosphatidylinositol-calcium second messenger system. Can function as a chemoattractant homing receptor on circulating memory lymphocytes and as a coreceptor for some primary HIV-2 isolates. In the CNS, could mediate hippoca…
2319	P21127	CDK11B	Kinase	Tchem	Cyclin-dependent kinase 11B		0.0271131	This gene encodes a member of the serine/threonine protein kinase family. Members of this kinase family are known to be essential for eukaryotic cell cycle control. Due to a segmental duplication, this gene shares very high sequence identity with a neighboring gene. These two genes are frequently deleted or altered in neuroblastoma. The protein kinase encoded by this gene can be cleaved by caspas…	0	41.3924	0.2	Plays multiple roles in cell cycle progression, cytokinesis and apoptosis. Involved in pre-mRNA splicing in a kinase activity-dependent manner. Isoform 7 may act as a negative regulator of normal cell cycle progression.
2320	P51677	CCR3	GPCR	Tchem	C-C chemokine receptor type 3	GPCR	0.00197059	The protein encoded by this gene is a receptor for C-C type chemokines. It belongs to family 1 of the G protein-coupled receptors. This receptor binds and responds to a variety of chemokines, including eotaxin (CCL11), eotaxin-3 (CCL26), MCP-3 (CCL7), MCP-4 (CCL13), and RANTES (CCL5). It is highly expressed in eosinophils and basophils, and is also detected in TH1 and TH2 cells, as well as in air…	731	522.124	0.142857	Receptor for a C-C type chemokine. Binds to eotaxin, eotaxin-3, MCP-3, MCP-4, RANTES and MIP-1 delta. Subsequently transduces a signal by increasing the intracellular calcium ions level. Alternative coreceptor with CD4 for HIV-1 infection.
2322	P48960	ADGRE5	GPCR	Tbio	CD97 antigen		0.0113756	This gene encodes a member of the EGF-TM7 subfamily of adhesion G protein-coupled receptors, which mediate cell-cell interactions. These proteins are cleaved by self-catalytic proteolysis into a large extracellular subunit and seven-span transmembrane subunit, which associate at the cell surface as a receptor complex. The encoded protein may play a role in cell adhesion as well as leukocyte recru…	813	121.363	1	Receptor potentially involved in both adhesion and signaling processes early after leukocyte activation. Plays an essential role in leukocyte migration (By similarity).	2BOU
2359	Q8WXS5	CACNG8	Ion Channel	Tbio	Voltage-dependent calcium channel gamma-8 subunit		0.267704	The protein encoded by this gene is a type I transmembrane AMPA receptor regulatory protein (TARP). TARPs regulate both trafficking and channel gating of the AMPA receptors. This gene is part of a functionally diverse eight-member protein subfamily of the PMP-22/EMP/MP20 family and is located in a cluster with two family members, a type II TARP and a calcium channel gamma subunit. The mRNA for th…	76	5.00611	0.125	Regulates the activity of L-type calcium channels that contain CACNA1C as pore-forming subunit (By similarity). Regulates the trafficking and gating properties of AMPA-selective glutamate receptors (AMPARs). Promotes their targeting to the cell membrane and synapses and modulates their gating properties by slowing their rates of activation, deactivation and desensitization and by mediating their …
2361	Q8WXS4	TMEM37	Ion Channel	Tbio	Voltage-dependent calcium channel gamma-like subunit	IC	0.00167645		66	1542.21	1	Thought to stabilize the calcium channel in an inactivated (closed) state. Modulates calcium current when coexpressed with CACNA1G (By similarity).
2363	Q06432	CACNG1	Ion Channel	Tbio	Voltage-dependent calcium channel gamma-1 subunit		0.118993	Voltage-dependent calcium channels are composed of five subunits. The protein encoded by this gene represents one of these subunits, gamma, and is one of two known gamma subunit proteins. This particular gamma subunit is part of skeletal muscle 1,4-dihydropyridine-sensitive calcium channels and is an integral membrane protein that plays a role in excitation-contraction coupling. This gene is part…	170	8.59937	3.61111	Regulatory subunit of the voltage-gated calcium channel that gives rise to L-type calcium currents in skeletal muscle. Regulates channel inactivation kinetics.
2379	P49336	CDK8	Kinase	Tchem	Cyclin-dependent kinase 8	Kinase	0.00508026	This gene encodes a member of the cyclin-dependent protein kinase (CDK) family. CDK family members are known to be important regulators of cell cycle progression. This kinase and its regulatory subunit, cyclin C, are components of the Mediator transcriptional regulatory complex, involved in both transcriptional activation and repression by phosphorylation of the carboxy-terminal domain of the lar…	408	282.326	0.166667	Component of the Mediator complex, a coactivator involved in regulated gene transcription of nearly all RNA polymerase II-dependent genes. Mediator functions as a bridge to convey information from gene-specific regulatory proteins to the basal RNA polymerase II transcription machinery. Mediator is recruited to promoters by direct interactions with regulatory proteins and serves as a scaffold for …	3RGF,4CRL,4F6S,4F6U,4F6W,4F70,4F7J,4F7L,4F7N,4F7S,4G6L,5BNJ,5CEI,5FGK,5HBE,5HBH,5HBJ,5HNB,5HVY,5I5Z,5ICP,5IDN,5IDP,5XQX,5XS2
2380	P11802	CDK4	Kinase	Tclin	Cyclin-dependent kinase 4	Kinase	0.00036742	The protein encoded by this gene is a member of the Ser/Thr protein kinase family. This protein is highly similar to the gene products of S. cerevisiae cdc28 and S. pombe cdc2. It is a catalytic subunit of the protein kinase complex that is important for cell cycle G1 phase progression. The activity of this kinase is restricted to the G1-S phase, which is controlled by the regulatory subunits D-t…	995	2941.76	0.2	Ser/Thr-kinase component of cyclin D-CDK4 (DC) complexes that phosphorylate and inhibit members of the retinoblastoma (RB) protein family including RB1 and regulate the cell-cycle during G(1)/S transition. Phosphorylation of RB1 allows dissociation of the transcription factor E2F from the RB/E2F complexes and the subsequent transcription of E2F target genes which are responsible for the progressi…	1LD2,2W96,2W99,2W9F,2W9Z,3G33,5FWK,5FWL,5FWM,5FWP
2383	Q07002	CDK18	Kinase	Tchem	Cyclin-dependent kinase 18		0.053383		175	20.0133	0.333333	May play a role in signal transduction cascades in terminally differentiated cells.
2409	Q9BXT2	CACNG6	Ion Channel	Tdark	Voltage-dependent calcium channel gamma-6 subunit		2.21571	Voltage-dependent calcium channels are composed of five subunits. The protein encoded by this gene represents one of these subunits, gamma, and is one of two known gamma subunit proteins. This particular gamma subunit is an integral membrane protein that is thought to stabilize the calcium channel in an inactive (closed) state. This gene is part of a functionally diverse eight-member protein subf…	112	1.05003	0.125	Regulates the activity of L-type calcium channels that contain CACNA1C as pore-forming subunit.
2417	P51684	CCR6	GPCR	Tchem	C-C chemokine receptor type 6	GPCR	0.00257933	This gene encodes a member of the beta chemokine receptor family, which is predicted to be a seven transmembrane protein similar to G protein-coupled receptors. The gene is preferentially expressed by immature dendritic cells and memory T cells. The ligand of this receptor is macrophage inflammatory protein 3 alpha (MIP-3 alpha). This receptor has been shown to be important for B-lineage maturati…	771	435.665	0.5	Receptor for the C-C type chemokine CCL20 (PubMed:9169459). Binds to CCL20 and subsequently transduces a signal by increasing the intracellular calcium ion levels (PubMed:20068036). Although CCL20 is its major ligand it can also act as a receptor for non-chemokine ligands such as beta-defensins (PubMed:25585877). Binds to defensin DEFB1 leading to increase in intracellular calcium ions and cAMP l…
2421	O00421	CCRL2	GPCR	Tchem	C-C chemokine receptor-like 2	GPCR	0.00294533	This gene encodes a chemokine receptor like protein, which is predicted to be a seven transmembrane protein and most closely related to CCR1. Chemokines and their receptors mediated signal transduction are critical for the recruitment of effector immune cells to the site of inflammation. This gene is expressed at high levels in primary neutrophils and primary monocytes, and is further upregulated…	405	388.674	0.5	Receptor for CCL19 and chemerin/RARRES2. Does not appear to be a signaling receptor, but may have a role in modulating chemokine-triggered immune responses by capturing and internalizing CCL19 or by presenting RARRES2 ligand to CMKLR1, a functional signaling receptors. Plays a critical role for the development of Th2 responses.
2424	P51681	CCR5	GPCR	Tclin	C-C chemokine receptor type 5	GPCR	0.00022549	This gene encodes a member of the beta chemokine receptor family, which is predicted to be a seven transmembrane protein similar to G protein-coupled receptors. This protein is expressed by T cells and macrophages, and is known to be an important co-receptor for macrophage-tropic virus, including HIV, to enter host cells. Defective alleles of this gene have been associated with the HIV infection …	1618	5040.6	0.083333	Receptor for a number of inflammatory CC-chemokines including CCL3/MIP-1-alpha, CCL4/MIP-1-beta and RANTES and subsequently transduces a signal by increasing the intracellular calcium ion level. May play a role in the control of granulocytic lineage proliferation or differentiation.	1ND8,1NE0,1OPN,1OPT,1OPW,2L87,2MZX,2RLL,2RRS,4MBS,5UIW,5YD3,5YD4,5YD5,5YY4,6FGP
2488	P32246	CCR1	GPCR	Tchem	C-C chemokine receptor type 1	GPCR	0.00218065	This gene encodes a member of the beta chemokine receptor family, which is predicted to be a seven transmembrane protein similar to G protein-coupled receptors. The ligands of this receptor include macrophage inflammatory protein 1 alpha (MIP-1 alpha), regulated on activation normal T expressed and secreted protein (RANTES), monocyte chemoattractant protein 3 (MCP-3), and myeloid progenitor inhib…	480	474.801	1	Receptor for a C-C type chemokine. Binds to MIP-1-alpha, MIP-1-delta, RANTES, and MCP-3 and, less efficiently, to MIP-1-beta or MCP-1 and subsequently transduces a signal by increasing the intracellular calcium ions level. Responsible for affecting stem cell proliferation.	1Y5D
2489	P51685	CCR8	GPCR	Tchem	C-C chemokine receptor type 8	GPCR	0.00525007	This gene encodes a member of the beta chemokine receptor family, which is predicted to be a seven transmembrane protein similar to G protein-coupled receptors. Chemokines and their receptors are important for the migration of various cell types into the inflammatory sites. This receptor protein preferentially expresses in the thymus. I-309, thymus activation-regulated cytokine (TARC) and macroph…	520	246.06	0.5	Receptor for the chemokine CCL1/SCYA1/I-309. May regulate monocyte chemotaxis and thymic cell line apoptosis. Alternative coreceptor with CD4 for HIV-1 infection.
2498	O94921	CDK14	Kinase	Tchem	Cyclin-dependent kinase 14		0.0207417	PFTK1 is a member of the CDC2 (MIM 116940)-related protein kinase family (Yang and Chen, 2001 [PubMed 11313143]).[supplied by OMIM, Mar 2008]	219	67.8277	1	Serine/threonine-protein kinase involved in the control of the eukaryotic cell cycle, whose activity is controlled by an associated cyclin. Acts as a cell-cycle regulator of Wnt signaling pathway during G2/M phase by mediating the phosphorylation of LRP6 at 'Ser-1490', leading to the activation of the Wnt signaling pathway. Acts as a regulator of cell cycle progression and cell proliferation via …
2499	Q15131	CDK10	Kinase	Tchem	Cyclin-dependent kinase 10		0.0277997	The protein encoded by this gene belongs to the CDK subfamily of the Ser/Thr protein kinase family. The CDK subfamily members are highly similar to the gene products of S. cerevisiae cdc28, and S. pombe cdc2, and are known to be essential for cell cycle progression. This kinase has been shown to play a role in cellular proliferation and its function is limited to cell cycle G2-M phase. Multiple t…	294	51.2812	2	Cyclin-dependent kinase that phosphorylates the transcription factor ETS2 (in vitro) and positively controls its proteasomal degradation (in cells) (PubMed:24218572). Involved in the regulation of actin cytoskeleton organization through the phosphorylation of actin dynamics regulators such as PKN2. Is a negative regulator of ciliogenesis through phosphorylation of PKN2 and promotion of RhoA signa…
2539	Q9UF02	CACNG5	Ion Channel	Tdark	Voltage-dependent calcium channel gamma-5 subunit		0.527054	The protein encoded by this gene is a type II transmembrane AMPA receptor regulatory protein (TARP). TARPs regulate both trafficking and channel gating of the AMPA receptors. This gene is part of a functionally diverse eight-member protein subfamily of the PMP-22/EMP/MP20 family and is located in a cluster with two family members, a type I TARP and a calcium channel gamma subunit. This gene is a …	82	2.74074	0.125	Regulates the gating properties of AMPA-selective glutamate receptors (AMPARs). Modulates their gating properties by accelerating their rates of activation, deactivation and desensitization. Displays subunit-specific AMPA receptor regulation. Shows specificity for GRIA1, GRIA4 and the long isoform of GRIA2. Thought to stabilize the calcium channel in an inactivated (closed) state (By similarity).
2545	Q00532	CDKL1	Kinase	Tchem	Cyclin-dependent kinase-like 1		0.110338	This gene product is a member of a large family of CDC2-related serine/threonine protein kinases that accumulates primarily in the nucleus. [provided by RefSeq, Nov 2018]	315	12.0533	0.2		4AGU
2559	Q9NYQ7	CELSR3	GPCR	Tbio	Cadherin EGF LAG seven-pass G-type receptor 3	GPCR	0.0270562	This gene belongs to the flamingo subfamily, which is included in the cadherin superfamily. The flamingo cadherins consist of nonclassic-type cadherins that do not interact with catenins. They are plasma membrane proteins containing seven epidermal growth factor-like repeats, nine cadherin domains and two laminin A G-type repeats in their ectodomain. They also have seven transmembrane domains, a …	293	59.1927	0.5	Receptor that may have an important role in cell/cell signaling during nervous system formation.
2590	O15075	DCLK1	Kinase	Tchem	Serine/threonine-protein kinase DCLK1	Kinase	0.0064994	This gene encodes a member of the protein kinase superfamily and the doublecortin family. The protein encoded by this gene contains two N-terminal doublecortin domains, which bind microtubules and regulate microtubule polymerization, a C-terminal serine/threonine protein kinase domain, which shows substantial homology to Ca2+/calmodulin-dependent protein kinase, and a serine/proline-rich domain i…	389	242.082	0.5	Probable kinase that may be involved in a calcium-signaling pathway controlling neuronal migration in the developing brain. May also participate in functions of the mature nervous system.	1MFW,1MG4,1UF0,5JZJ,5JZN
2591	Q9C098	DCLK3	Kinase	Tchem	Serine/threonine-protein kinase DCLK3		0.00454456		87	292.004	0.5
2612	Q86XP1	DGKH	Kinase	Tbio	Diacylglycerol kinase eta	Kinase	0.0157641	This gene encodes a member of the diacylglycerol kinase (DGK) enzyme family. Members of this family are involved in regulating intracellular concentrations of diacylglycerol and phosphatidic acid. Variation in this gene has been associated with bipolar disorder. Alternatively spliced transcript variants have been identified. [provided by RefSeq, Jul 2014]	115	77.5927	1	Phosphorylates diacylglycerol (DAG) to generate phosphatidic acid (PA). Plays a key role in promoting cell growth. Activates the Ras/B-Raf/C-Raf/MEK/ERK signaling pathway induced by EGF. Regulates the recruitment of RAF1 and BRAF from cytoplasm to membranes and their heterodimerization.
2613	P52824	DGKQ	Kinase	Tbio	Diacylglycerol kinase theta	Kinase	0.0197312	The protein encoded by this gene contains three cysteine-rich domains, a proline-rich region, and a pleckstrin homology domain with an overlapping Ras-associating domain. It is localized in the speckle domains of the nucleus, and mediates the regeneration of phosphatidylinositol (PI) from diacylglycerol in the PI-cycle during cell signal transduction. [provided by RefSeq, Jul 2008]	203	50.5693	1	Phosphorylates diacylglycerol (DAG) to generate phosphatidic acid (PA). May regulate the activity of protein kinase C by controlling the balance between these two signaling lipids. Activated in the nucleus in response to alpha-thrombin and nerve growth factor (By similarity). May be involved in cAMP-induced activation of NR5A1 and subsequent steroidogenic gene transcription by delivering PA as li…
2693	P23743	DGKA	Kinase	Tbio	Diacylglycerol kinase alpha	Kinase	0.00756096	The protein encoded by this gene belongs to the eukaryotic diacylglycerol kinase family. It acts as a modulator that competes with protein kinase C for the second messenger diacylglycerol in intracellular signaling pathways. It also plays an important role in the resynthesis of phosphatidylinositols and phosphorylating diacylglycerol to phosphatidic acid. Several transcript variants encoding diff…	389	173.222	0.125	Upon cell stimulation converts the second messenger diacylglycerol into phosphatidate, initiating the resynthesis of phosphatidylinositols and attenuating protein kinase C activity.	1TUZ
2748	P47869	GABRA2	Ion Channel	Tclin	Gamma-aminobutyric acid receptor subunit alpha-2	IC	0.00663529	GABA is the major inhibitory neurotransmitter in the mammalian brain where it acts at GABA-A receptors, which are ligand-gated chloride channels. Chloride conductance of these channels can be modulated by agents such as benzodiazepines that bind to the GABA-A receptor. At least 16 distinct subunits of GABA-A receptors have been identified. Alternatively spliced transcript variants encoding differ…	281	177.909	2	GABA, the major inhibitory neurotransmitter in the vertebrate brain, mediates neuronal inhibition by binding to the GABA/benzodiazepine receptor and opening an integral chloride channel.
2776	Q16445	GABRA6	Ion Channel	Tclin	Gamma-aminobutyric acid receptor subunit alpha-6	IC	0.0289466	GABA is the major inhibitory neurotransmitter in the mammalian brain where it acts at GABA-A receptors, which are ligand-gated chloride channels. Chloride conductance of these channels can be modulated by agents such as benzodiazepines that bind to the GABA-A receptor. At least 16 distinct subunits of GABA-A receptors have been identified. [provided by RefSeq, Jul 2008]	191	35.7723	1	GABA, the major inhibitory neurotransmitter in the vertebrate brain, mediates neuronal inhibition by binding to the GABA/benzodiazepine receptor and opening an integral chloride channel.
2778	P47870	GABRB2	Ion Channel	Tclin	Gamma-aminobutyric acid receptor subunit beta-2	IC	0.0195415	The gamma-aminobutyric acid (GABA) A receptor is a multisubunit chloride channel that mediates the fastest inhibitory synaptic transmission in the central nervous system. This gene encodes GABA A receptor, beta 2 subunit. It is mapped to chromosome 5q34 in a cluster comprised of genes encoding alpha 1 and gamma 2 subunits of the GABA A receptor. Alternative splicing of this gene generates 2 trans…	312	60.1724	1	Component of the heteropentameric receptor for GABA, the major inhibitory neurotransmitter in the vertebrate brain. Functions also as histamine receptor and mediates cellular responses to histamine. Functions as receptor for diazepines and various anesthetics, such as pentobarbital; these are bound at a separate allosteric effector binding site. Functions as ligand-gated chloride channel.	6D6T,6D6U
2826	Q9UQ88	CDK11A	Kinase	Tchem	Cyclin-dependent kinase 11A		0.0231299	This gene encodes a member of the serine/threonine protein kinase family. Members of this kinase family are known to be essential for eukaryotic cell cycle control. Due to a segmental duplication, this gene shares very high sequence identity with a neighboring gene. These two genes are frequently deleted or altered in neuroblastoma. The protein kinase encoded by this gene can be cleaved by caspas…	127	52.532	1.16667	Appears to play multiple roles in cell cycle progression, cytokinesis and apoptosis. The p110 isoforms have been suggested to be involved in pre-mRNA splicing, potentially by phosphorylating the splicing protein SFRS7. The p58 isoform may act as a negative regulator of normal cell cycle progression.
2839	Q00537	CDK17	Kinase	Tchem	Cyclin-dependent kinase 17		0.250463	The protein encoded by this gene belongs to the cdc2/cdkx subfamily of the ser/thr family of protein kinases. It has similarity to a rat protein that is thought to play a role in terminally differentiated neurons. Alternatively spliced transcript variants encoding different isoforms have been found. [provided by RefSeq, Jul 2010]	135	4.19513	0.333333	May play a role in terminally differentiated neurons. Has a Ser/Thr-phosphorylating activity for histone H1 (By similarity).
2885	O94886	TMEM63A	Ion Channel	Tbio	CSC1-like protein 1		0.33131		72	6.13405		Acts as an osmosensitive calcium-permeable cation channel.
2886	Q5T3F8	TMEM63B	Ion Channel	Tdark	CSC1-like protein 2		0.250174		34	5.75932	0.333333	Acts as an osmosensitive calcium-permeable cation channel.
2919	Q9UBN1	CACNG4	Ion Channel	Tbio	Voltage-dependent calcium channel gamma-4 subunit		0.159766	The protein encoded by this gene is a type I transmembrane AMPA receptor regulatory protein (TARP). TARPs regulate both trafficking and channel gating of the AMPA receptors. This gene is part of a functionally diverse eight-member protein subfamily of the PMP-22/EMP/MP20 family and is located in a cluster with two family members, a type II TARP and a calcium channel gamma subunit. [provided by Re…	156	8.56245	0.125	Regulates the activity of L-type calcium channels that contain CACNA1C as pore-forming subunit (PubMed:21127204). Regulates the trafficking and gating properties of AMPA-selective glutamate receptors (AMPARs), including GRIA1 and GRIA4. Promotes their targeting to the cell membrane and synapses and modulates their gating properties by slowing their rates of activation, deactivation and desensitiz…
2941	Q8IZL9	CDK20	Kinase	Tbio	Cyclin-dependent kinase 20		0.0117698	The protein encoded by this gene contains a kinase domain most closely related to the cyclin-dependent protein kinases. The encoded kinase may activate cyclin-dependent kinase 2 and is involved in cell growth. Alternatively spliced transcript variants encoding distinct isoforms have been reported. [provided by RefSeq, Dec 2009]	319	102.803	1	Required for high-level Shh responses in the developing neural tube. Together with TBC1D32, controls the structure of the primary cilium by coordinating assembly of the ciliary membrane and axoneme, allowing GLI2 to be properly activated in response to SHH signaling (By similarity). Involved in cell growth. Activates CDK2, a kinase involved in the control of the cell cycle, by phosphorylating res…
2967	P46092	CCR10	GPCR	Tchem	C-C chemokine receptor type 10	GPCR	0.014331	Chemokines are a group of small (approximately 8 to 14 kD), mostly basic, structurally related molecules that regulate cell trafficking of various types of leukocytes through interactions with a subset of 7-transmembrane, G protein-coupled receptors. Chemokines also play fundamental roles in the development, homeostasis, and function of the immune system, and they have effects on cells of the cen…	411	75.9209	0.5	Receptor for chemokines SCYA27 and SCYA28. Subsequently transduces a signal by increasing the intracellular calcium ions level and stimulates chemotaxis in a pre-B cell line.
2973	O00311	CDC7	Kinase	Tchem	Cell division cycle 7-related protein kinase	Kinase	0.00435359	This gene encodes a cell division cycle protein with kinase activity that is critical for the G1/S transition. The yeast homolog is also essential for initiation of DNA replication as cell division occurs. Overexpression of this gene product may be associated with neoplastic transformation for some tumors. Multiple alternatively spliced transcript variants that encode the same protein have been d…	282	257.254	0.5	Seems to phosphorylate critical substrates that regulate the G1/S phase transition and/or DNA replication. Can phosphorylates MCM2 and MCM3.	4F99,4F9A,4F9B,4F9C,5UWQ,5UWR
2978	Q9BWU1	CDK19	Kinase	Tchem	Cyclin-dependent kinase 19		0.0313267	This gene encodes a protein that is one of the components of the Mediator co-activator complex. The Mediator complex is a multi-protein complex required for transcriptional activation by DNA binding transcription factors of genes transcribed by RNA polymerase II. The protein encoded by this gene is similar to cyclin-dependent kinase 8 which can also be a component of the Mediator complex. Alterna…	177	38.0196	0.142857
2996	P24941	CDK2	Kinase	Tchem	Cyclin-dependent kinase 2	Kinase	0.00032118	This gene encodes a member of a family of serine/threonine protein kinases that participate in cell cycle regulation. The encoded protein is the catalytic subunit of the cyclin-dependent protein kinase complex, which regulates progression through the cell cycle. Activity of this protein is especially critical during the G1 to S phase transition. This protein associates with and regulated by other…	1544	3206.11	2.7	Serine/threonine-protein kinase involved in the control of the cell cycle; essential for meiosis, but dispensable for mitosis. Phosphorylates CTNNB1, USP37, p53/TP53, NPM1, CDK7, RB1, BRCA2, MYC, NPAT, EZH2. Triggers duplication of centrosomes and DNA. Acts at the G1-S transition to promote the E2F transcriptional program and the initiation of DNA synthesis, and modulates G2 progression; controls…	1AQ1,1B38,1B39,1BUH,1CKP,1DI8,1DM2,1E1V,1E1X,1E9H,1F5Q,1FIN,1FQ1,1FVT,1FVV,1G5S,1GIH,1GII,1GIJ,1GY3,1GZ8,1H00,1H01,1H07,1H08,1H0V,1H0W,1H1P,1H1Q,1H1R,1H1S,1H24,1H25,1H26,1H27,1H28,1HCK,1HCL,1JST,1JSU,1JSV,1JVP,1KE5,1KE6,1KE7,1KE8,1KE9,1OGU,1OI9,1OIQ,1OIR,1OIT,1OIU,1OIY,1OKV,1OKW,1OL1,1OL2,1P2A,1P5E,1PF8,1PKD,1PW2,1PXI,1PXJ,1PXK,1PXL,1PXM,1PXN,1PXO,1PXP,1PYE,1QMZ,1R78,1URC,1URW,1V1K,1VYW,1VYZ,1W0X…
3000	Q00535	CDK5	Kinase	Tchem	Cyclin-dependent-like kinase 5	Kinase	0.00071394	This gene encodes a proline-directed serine/threonine kinase that is a member of the cyclin-dependent kinase family of proteins. Unlike other members of the family, the protein encoded by this gene does not directly control cell cycle regulation. Instead the protein, which is predominantly expressed at high levels in mammalian postmitotic central nervous system neurons, functions in diverse proce…	929	1683.25	0.333333	Proline-directed serine/threonine-protein kinase essential for neuronal cell cycle arrest and differentiation and may be involved in apoptotic cell death in neuronal diseases by triggering abortive cell cycle re-entry. Interacts with D1 and D3-type G1 cyclins. Phosphorylates SRC, NOS3, VIM/vimentin, p35/CDK5R1, MEF2A, SIPA1L1, SH3GLB1, PXN, PAK1, MCAM/MUC18, SEPT5, SYN1, DNM1, AMPH, SYNJ1, CDK16,…	1H4L,1LFR,1UNG,1UNH,1UNL,3O0G,4AU8
3074	P34998	CRHR1	GPCR	Tclin	Corticotropin-releasing factor receptor 1	GPCR	0.00101773	This locus represents naturally occurring readthrough transcription between neighboring genes CRHR1-IT1, CRHR1 intronic transcript 1 (Gene ID: 147081) and CRHR1, corticotropin releasing hormone receptor 1 (Gene ID: 1394) on chromosome 17. The readthrough transcript encodes a protein that shares sequence identity with the product of the CRHR1 gene. [provided by RefSeq, Dec 2016]	480	1221.03		G-protein coupled receptor for CRH (corticotropin-releasing factor) and UCN (urocortin). Has high affinity for CRH and UCN. Ligand binding causes a conformation change that triggers signaling via guanine nucleotide-binding proteins (G proteins) and down-stream effectors, such as adenylate cyclase. Promotes the activation of adenylate cyclase, leading to increased intracellular cAMP levels. Inhibi…	2L27,3EHS,3EHT,3EHU,4K5Y,4Z9G
3082	P68400	CSNK2A1	Kinase	Tchem	Casein kinase II subunit alpha	Kinase	0.00187855	Casein kinase II is a serine/threonine protein kinase that phosphorylates acidic proteins such as casein. It is involved in various cellular processes, including cell cycle control, apoptosis, and circadian rhythm. The kinase exists as a tetramer and is composed of an alpha, an alpha-prime, and two beta subunits. The alpha subunits contain the catalytic activity while the beta subunits undergo au…	682	563.305	0.333333	Catalytic subunit of a constitutively active serine/threonine-protein kinase complex that phosphorylates a large number of substrates containing acidic residues C-terminal to the phosphorylated serine or threonine. Regulates numerous cellular processes, such as cell cycle progression, apoptosis and transcription, as well as viral infection. May act as a regulatory node which integrates and coordi…	1JWH,1NA7,1PJK,2PVR,2ZJW,3AMY,3AT2,3AT3,3AT4,3AXW,3BQC,3C13,3FWQ,3H30,3JUH,3MB6,3MB7,3NGA,3NSZ,3OWJ,3OWK,3OWL,3PE1,3PE2,3PE4,3Q04,3Q9W,3Q9X,3Q9Y,3Q9Z,3QA0,3R0T,3RPS,3TAX,3U4U,3U87,3U9C,3W8L,3WAR,3WIK,3WIL,3WOW,4DGL,4FBX,4GRB,4GUB,4GYW,4GYY,4GZ3,4IB5,4KWP,4MD7,4MD8,4MD9,4NH1,4RLL,4UB7,4UBA,5B0X,5CLP,5CQU,5CQW,5CS6,5CSH,5CSP,5CSV,5CT0,5CTP,5CU0,5CU2,5CU3,5CU4,5CU6,5CVF,5CVG,5CVH,5CX9,5H8B,5H8E,5H8G…
3084	P67870	CSNK2B	Kinase	Tbio	Casein kinase II subunit beta	Kinase	0.00152367	This gene encodes the beta subunit of casein kinase II, a ubiquitous protein kinase which regulates metabolic pathways, signal transduction, transcription, translation, and replication. The enzyme is composed of three subunits, alpha, alpha prime and beta, which form a tetrameric holoenzyme. The alpha and alpha prime subunits are catalytic, while the beta subunit serves regulatory functions. The …	553	683.649	1	Participates in Wnt signaling (By similarity). Plays a complex role in regulating the basal catalytic activity of the alpha subunit.	1DS5,1JWH,1QF8,3EED,4DGL,4MD7,4MD8,4MD9,4NH1
3152	Q9UIK4	DAPK2	Kinase	Tchem	Death-associated protein kinase 2	Kinase	0.0239186	This gene encodes a protein that belongs to the serine/threonine protein kinase family. This protein contains a N-terminal protein kinase domain followed by a conserved calmodulin-binding domain with significant similarity to that of death-associated protein kinase 1 (DAPK1), a positive regulator of programmed cell death. Overexpression of this gene was shown to induce cell apoptosis. It uses mul…	564	53.0572	0.25	Calcium/calmodulin-dependent serine/threonine kinase involved in multiple cellular signaling pathways that trigger cell survival, apoptosis, and autophagy. Regulates both type I apoptotic and type II autophagic cell death signals, depending on the cellular setting. The former is caspase-dependent, while the latter is caspase-independent and is characterized by the accumulation of autophagic vesic…	1WMK,1WRZ,1Z9X,1ZUZ,1ZWS,2A27,2A2A,2CKE
3238	Q08345	DDR1	Kinase	Tchem	Epithelial discoidin domain-containing receptor 1	Kinase	0.00432488	Receptor tyrosine kinases play a key role in the communication of cells with their microenvironment. These kinases are involved in the regulation of cell growth, differentiation and metabolism. The protein encoded by this gene belongs to a subfamily of tyrosine kinase receptors with homology to Dictyostelium discoideum protein discoidin I in their extracellular domain, and that are activated by v…	706	355.429	1	Tyrosine kinase that functions as cell surface receptor for fibrillar collagen and regulates cell attachment to the extracellular matrix, remodeling of the extracellular matrix, cell migration, differentiation, survival and cell proliferation. Collagen binding triggers a signaling pathway that involves SRC and leads to the activation of MAP kinases. Regulates remodeling of the extracellular matri…	3ZOS,4AG4,4BKJ,4CKR,5BVK,5BVN,5BVO,5BVW,5FDP,5FDX,6GWR
3273	P53355	DAPK1	Kinase	Tchem	Death-associated protein kinase 1	Kinase	0.0031894	Death-associated protein kinase 1 is a positive mediator of gamma-interferon induced programmed cell death. DAPK1 encodes a structurally unique 160-kD calmodulin dependent serine-threonine kinase that carries 8 ankyrin repeats and 2 putative P-loop consensus sites. It is a tumor suppressor candidate. Alternative splicing results in multiple transcript variants. [provided by RefSeq, Dec 2013]	362	384.235	0.5	Calcium/calmodulin-dependent serine/threonine kinase involved in multiple cellular signaling pathways that trigger cell survival, apoptosis, and autophagy. Regulates both type I apoptotic and type II autophagic cell deaths signal, depending on the cellular setting. The former is caspase-dependent, while the latter is caspase-independent and is characterized by the accumulation of autophagic vesic…	1IG1,1JKK,1JKL,1JKS,1JKT,1P4F,1WVW,1WVX,1WVY,1YR5,2W4J,2W4K,2X0G,2XUU,2XZS,2Y0A,2Y4P,2Y4V,2YAK,3DFC,3DGK,3EH9,3EHA,3F5G,3F5U,3GU4,3GU5,3GU6,3GU7,3GU8,3GUB,3ZXT,4B4L,4PF4,4TL0,4TXC,4UV0,4YO4,4YPD,5AUT,5AUU,5AUV,5AUW,5AUX,5AUY,5AUZ,5AV0,5AV1,5AV2,5AV3,5AV4
3366	Q7Z7A4	PXK	Kinase	Tbio	PX domain-containing protein kinase-like protein		0.0231651	This gene encodes a phox (PX) domain-containing protein which may be involved in synaptic transmission and the ligand-induced internalization and degradation of epidermal growth factors. Variations in this gene may be associated with susceptibility to systemic lupus erythematosus (SLE). Alternative splicing results in multiple transcript variants. [provided by RefSeq, Jan 2014]	156	66.9418	1.5	Binds to and modulates brain Na,K-ATPase subunits ATP1B1 and ATP1B3 and may thereby participate in the regulation of electrical excitability and synaptic transmission. May not display kinase activity.
3382	Q03431	PTH1R	GPCR	Tclin	Parathyroid hormone/parathyroid hormone-related peptide receptor	GPCR	0.00413989	The protein encoded by this gene is a member of the G-protein coupled receptor family 2. This protein is a receptor for parathyroid hormone (PTH) and for parathyroid hormone-like hormone (PTHLH). The activity of this receptor is mediated by G proteins which activate adenylyl cyclase and also a phosphatidylinositol-calcium second messenger system. Defects in this receptor are known to be the cause…	382	259.325	1	Receptor for parathyroid hormone and for parathyroid hormone-related peptide. The activity of this receptor is mediated by G proteins which activate adenylyl cyclase and also a phosphatidylinositol-calcium second messenger system.	1BL1,1ET2,1ET3,3C4M,3H3G,3L2J,4Z8J,5EMB
3405	P04049	RAF1	Kinase	Tclin	RAF proto-oncogene serine/threonine-protein kinase	Kinase	0.00117121	This gene is the cellular homolog of viral raf gene (v-raf). The encoded protein is a MAP kinase kinase kinase (MAP3K), which functions downstream of the Ras family of membrane associated GTPases to which it binds directly. Once activated, the cellular RAF1 protein can phosphorylate to activate the dual specificity protein kinases MEK1 and MEK2, which in turn phosphorylate to activate the serine/…	2878	788.89	1	Serine/threonine-protein kinase that acts as a regulatory link between the membrane-associated Ras GTPases and the MAPK/ERK cascade, and this critical regulatory link functions as a switch determining cell fate decisions including proliferation, differentiation, apoptosis, survival and oncogenic transformation. RAF1 activation initiates a mitogen-activated protein kinase (MAPK) cascade that compr…	1C1Y,1FAQ,1FAR,1GUA,1RFA,3CU8,3IQJ,3IQU,3IQV,3KUC,3KUD,3NKX,3O8I,3OMV,4FJ3,4G0N,4G3X,4IEA,4IHL
3437	P07949	RET	Kinase	Tclin	Proto-oncogene tyrosine-protein kinase receptor Ret	Kinase	0.00028324	This gene encodes a transmembrane receptor and member of the tyrosine protein kinase family of proteins. Binding of ligands such as GDNF (glial cell-line derived neurotrophic factor) and other related proteins to the encoded receptor stimulates receptor dimerization and activation of downstream signaling pathways that play a role in cell differentiation, growth, migration and survival. The encode…	1078	4517.14	0.5	Receptor tyrosine-protein kinase involved in numerous cellular mechanisms including cell proliferation, neuronal navigation, cell migration, and cell differentiation upon binding with glial cell derived neurotrophic factor family ligands. Phosphorylates PTK2/FAK1. Regulates both cell death/survival balance and positional information. Required for the molecular mechanisms orchestration during inte…	1XPD,2IVS,2IVT,2IVU,2IVV,2X2K,2X2L,2X2M,2X2U,4CKI,4CKJ,4UX8,5AMN,5FM2,5FM3,6FEK
3546	P49683	PRLHR	GPCR	Tchem	Prolactin-releasing peptide receptor	GPCR	0.0502444	PRLHR is a 7-transmembrane domain receptor for prolactin-releasing hormone (PRLH; MIM 602663) that is highly expressed in anterior pituitary (Ozawa et al., 2002 [PubMed 11923475]).[supplied by OMIM, Mar 2008]	267	20.9261	0.25	Receptor for prolactin-releasing peptide (PrRP). Implicated in lactation, regulation of food intake and pain-signal processing.
3579	O43613	HCRTR1	GPCR	Tclin	Orexin receptor type 1	GPCR	0.00318731	The protein encoded by this gene is a G-protein coupled receptor involved in the regulation of feeding behavior. The encoded protein selectively binds the hypothalamic neuropeptide orexin A. A related gene (HCRTR2) encodes a G-protein coupled receptor that binds orexin A and orexin B. [provided by RefSeq, Jan 2009]	383	361.279	0.142857	Moderately selective excitatory receptor for orexin-A and, with a lower affinity, for orexin-B neuropeptide (PubMed:9491897, PubMed:26950369). Triggers an increase in cytoplasmic Ca(2+) levels in response to orexin-A binding (PubMed:9491897, PubMed:26950369).	4ZJ8,4ZJC
3592	Q8IZE3	SCYL3	Kinase	Tbio	Protein-associating with the carboxyl-terminal domain of ezrin		0.137356	This gene encodes a protein with a kinase domain and four HEAT repeats. The encoded protein interacts with the C-terminal domain of ezrin, an ERM protein, and may play a role in cell adhesion and migration. Alternative splicing results in multiple transcript variants encoding multiple isoforms. [provided by RefSeq, Jun 2012]	221	13.3921	0.5	May play a role in regulating cell adhesion/migration complexes in migrating cells.
3601	Q9P286	PAK5	Kinase	Tchem	Serine/threonine-protein kinase PAK 5		0.0213863	The protein encoded by this gene is a member of the PAK family of Ser/Thr protein kinases. PAK family members are known to be effectors of Rac/Cdc42 GTPases, which have been implicated in the regulation of cytoskeletal dynamics, proliferation, and cell survival signaling. This kinase contains a CDC42/Rac1 interactive binding (CRIB) motif, and has been shown to bind CDC42 in the presence of GTP. T…	339	60.2513	0.25	Serine/threonine protein kinase that plays a role in a variety of different signaling pathways including cytoskeleton regulation, cell migration, proliferation or cell survival. Activation by various effectors including growth factor receptors or active CDC42 and RAC1 results in a conformational change and a subsequent autophosphorylation on several serine and/or threonine residues. Phosphorylate…	2F57
3609	Q9BZ23	PANK2	Kinase	Tbio	Pantothenate kinase 2, mitochondrial	Kinase	0.00465551	This gene encodes a protein belonging to the pantothenate kinase family and is the only member of that family to be expressed in mitochondria. Pantothenate kinase is a key regulatory enzyme in the biosynthesis of coenzyme A (CoA) in bacteria and mammalian cells. It catalyzes the first committed step in the universal biosynthetic pathway leading to CoA and is itself subject to regulation through f…	324	270.758	1	May be the master regulator of the CoA biosynthesis.	5e+26
3611	Q96RI0	F2RL3	GPCR	Tchem	Proteinase-activated receptor 4	GPCR	0.0195331	This gene encodes a member of the protease-activated receptor subfamily, part of the G-protein coupled receptor 1 family of proteins. The encoded receptor is proteolytically processed to reveal an extracellular N-terminal tethered ligand that binds to and activates the receptor. This receptor plays a role in blood coagulation, inflammation and response to pain. Hypomethylation at this gene may be…	369	70.9647	0.5	Receptor for activated thrombin or trypsin coupled to G proteins that stimulate phosphoinositide hydrolysis. May play a role in platelets activation.	2ZPK,3QDZ
3641	P49190	PTH2R	GPCR	Tchem	Parathyroid hormone 2 receptor	GPCR	0.0339786	The protein encoded by this gene is a member of the G-protein coupled receptor 2 family. This protein is a receptor for parathyroid hormone (PTH). This receptor is more selective in ligand recognition and has a more specific tissue distribution compared to parathyroid hormone receptor 1 (PTHR1). It is activated only by PTH and not by parathyroid hormone-like hormone (PTHLH) and is particularly ab…	208	33.9109	0.5	This is a specific receptor for parathyroid hormone. The activity of this receptor is mediated by G proteins which activate adenylyl cyclase. PTH2R may be responsible for PTH effects in a number of physiological systems. It may play a significant role in pancreatic function. PTH2R presence in neurons indicates that it may function as a neurotransmitter receptor (By similarity).
3667	P78527	PRKDC	Kinase	Tchem	DNA-dependent protein kinase catalytic subunit	Kinase	0.00107984	This gene encodes the catalytic subunit of the DNA-dependent protein kinase (DNA-PK). It functions with the Ku70/Ku80 heterodimer protein in DNA double strand break repair and recombination. The protein encoded is a member of the PI3/PI4-kinase family.[provided by RefSeq, Jul 2010]	1451	1060.38	0.333333	Serine/threonine-protein kinase that acts as a molecular sensor for DNA damage. Involved in DNA non-homologous end joining (NHEJ) required for double-strand break (DSB) repair and V(D)J recombination. Must be bound to DNA to express its catalytic properties. Promotes processing of hairpin DNA structures in V(D)J recombination by activation of the hairpin endonuclease artemis (DCLRE1C). The assemb…	5LUQ,5W1R,5Y3R
3671	Q13308	PTK7	Kinase	Tbio	Inactive tyrosine-protein kinase 7	Kinase	0.00251552	This gene encodes a member of the receptor protein tyrosine kinase family of proteins that transduce extracellular signals across the cell membrane. The encoded protein lacks detectable catalytic tyrosine kinase activity, is involved in the Wnt signaling pathway and plays a role in multiple cellular processes including polarity and adhesion. Alternatively spliced transcript variants encoding mult…	552	416.074	0.5	Inactive tyrosine kinase involved in Wnt signaling pathway. Component of both the non-canonical (also known as the Wnt/planar cell polarity signaling) and the canonical Wnt signaling pathway. Functions in cell adhesion, cell migration, cell polarity, proliferation, actin cytoskeleton reorganization and apoptosis. Has a role in embryogenesis, epithelial tissue organization and angiogenesis.
3675	O60331	PIP5K1C	Kinase	Tchem	Phosphatidylinositol 4-phosphate 5-kinase type-1 gamma		0.0323077	This locus encodes a type I phosphatidylinositol 4-phosphate 5-kinase. The encoded protein catalyzes phosphorylation of phosphatidylinositol 4-phosphate, producing phosphatidylinositol 4,5-bisphosphate. This enzyme is found at synapses and has been found to play roles in endocytosis and cell migration. Mutations at this locus have been associated with lethal congenital contractural syndrome. Alte…	218	36.0352	0.333333	Catalyzes the phosphorylation of phosphatidylinositol 4-phosphate (PtdIns4P) to form phosphatidylinositol 4,5-bisphosphate (PtdIns(4,5)P2). PtdIns(4,5)P2 is involved in a variety of cellular processes and is the substrate to form phosphatidylinositol 3,4,5-trisphosphate (PtdIns(3,4,5)P3), another second messenger. The majority of PtdIns(4,5)P2 is thought to occur via type I phosphatidylinositol 4…	2G35,3H1Z,3H85
3725	Q13523	PRPF4B	Kinase	Tchem	Serine/threonine-protein kinase PRP4 homolog		0.0591279	Pre-mRNA splicing occurs in two sequential transesterification steps, and the protein encoded by this gene is thought to be involved in pre-mRNA splicing and in signal transduction. This protein belongs to a kinase family that includes serine/arginine-rich protein-specific kinases and cyclin-dependent kinases (CDKs). This protein is regarded as a CDK-like kinase (Clk) with homology to mitogen-act…	156	25.3342	0.5	Has a role in pre-mRNA splicing. Phosphorylates SF2/ASF.	4IAN,4IFC,4IIR,4IJP,6CNH
3726	P11908	PRPS2	Kinase	Tbio	Ribose-phosphate pyrophosphokinase 2	Kinase	0.0247242	This gene encodes a phosphoribosyl pyrophosphate synthetase that plays a central role in the synthesis of purines and pyrimidines. The encoded protein catalyzes the synthesis of 5-phosphoribosyl 1-pyrophosphate from ATP and D-ribose 5-phosphate. Alternate splicing results in multiple transcript variants. [provided by RefSeq, Mar 2010]	228	37.5549	0.5	Catalyzes the synthesis of phosphoribosylpyrophosphate (PRPP) that is essential for nucleotide synthesis.
3748	Q13882	PTK6	Kinase	Tchem	Protein-tyrosine kinase 6	Kinase	0.00480214	The protein encoded by this gene is a cytoplasmic nonreceptor protein kinase which may function as an intracellular signal transducer in epithelial tissues. Overexpression of this gene in mammary epithelial cells leads to sensitization of the cells to epidermal growth factor and results in a partially transformed phenotype. Expression of this gene has been detected at low levels in some breast tu…	478	306.383	0.333333	Non-receptor tyrosine-protein kinase implicated in the regulation of a variety of signaling pathways that control the differentiation and maintenance of normal epithelia, as well as tumor growth. Function seems to be context dependent and differ depending on cell type, as well as its intracellular localization. A number of potential nuclear and cytoplasmic substrates have been identified. These i…	1RJA,2KGT,5D7V,5DA3,5H2U,6CZ2,6CZ3,6CZ4
3766	Q96S44	TP53RK	Kinase	Tbio	EKC/KEOPS complex subunit TP53RK		0.0430225		257	36.7214	1	Component of the EKC/KEOPS complex that is required for the formation of a threonylcarbamoyl group on adenosine at position 37 (t(6)A37) in tRNAs that read codons beginning with adenine (PubMed:22912744, PubMed:27903914). The complex is probably involved in the transfer of the threonylcarbamoyl moiety of threonylcarbamoyl-AMP (TC-AMP) to the N6 group of A37 (PubMed:22912744, PubMed:27903914). TP5…
3826	P51817	PRKX	Kinase	Tchem	cAMP-dependent protein kinase catalytic subunit PRKX	Kinase	0.0259907	This gene encodes a serine threonine protein kinase that has similarity to the catalytic subunit of cyclic AMP dependent protein kinases. The encoded protein is developmentally regulated and may be involved in renal epithelial morphogenesis. This protein may also be involved in macrophage and granulocyte maturation. Abnormal recombination between this gene and a related pseudogene on chromosome Y…	219	41.3907	1	Serine/threonine protein kinase regulated by and mediating cAMP signaling in cells. Acts through phosphorylation of downstream targets that may include CREB, SMAD6 and PKD1 and has multiple functions in cellular differentiation and epithelial morphogenesis. Regulates myeloid cell differentiation through SMAD6 phosphorylation. Involved in nephrogenesis by stimulating renal epithelial cell migratio…
3900	Q15835	GRK1	Kinase	Tchem	Rhodopsin kinase	Kinase	0.00598725	This gene encodes a member of the guanine nucleotide-binding protein (G protein)-coupled receptor kinase subfamily of the Ser/Thr protein kinase family. The protein phosphorylates rhodopsin and initiates its deactivation. Defects in GRK1 are known to cause Oguchi disease 2 (also known as stationary night blindness Oguchi type-2). [provided by RefSeq, Jul 2008]	234	154.809	0.333333	Retina-specific kinase involved in the signal turnoff via phosphorylation of rhodopsin (RHO), the G protein- coupled receptor that initiates the phototransduction cascade. This rapid desensitization is essential for scotopic vision and permits rapid adaptation to changes in illumination.	5AFP
3948	O75569	PRKRA	Kinase	Tbio	Interferon-inducible double-stranded RNA-dependent protein kinase activator A	Kinase	0.0211562	This gene encodes a protein kinase activated by double-stranded RNA which mediates the effects of interferon in response to viral infection. Mutations in this gene have been associated with dystonia. Alternative splicing results in multiple transcript variants. [provided by RefSeq, Nov 2008]	350	67.4811	0.333333	Activates EIF2AK2/PKR in the absence of double-stranded RNA (dsRNA), leading to phosphorylation of EIF2S1/EFI2-alpha and inhibition of translation and induction of apoptosis. Required for siRNA production by DICER1 and for subsequent siRNA-mediated post-transcriptional gene silencing. Does not seem to be required for processing of pre-miRNA to miRNA by DICER1. Promotes UBC9-p53/TP53 association a…	2DIX
3949	O43930	PRKY	Kinase	Tdark	Putative serine/threonine-protein kinase PRKY	Kinase		This gene is similar to the protein kinase, X-linked gene in the pseudoautosomal region of the X chromosome. The gene is classified as a transcribed pseudogene because it has lost a coding exon that results in all transcripts being candidates for nonsense-mediated decay (NMD) and unlikely to express a protein. Abnormal recombination between this gene and a related gene on chromosome X is a freque…	0	0	1.16667
3961	P60891	PRPS1	Kinase	Tbio	Ribose-phosphate pyrophosphokinase 1	Kinase	0.0113966	This gene encodes an enzyme that catalyzes the phosphoribosylation of ribose 5-phosphate to 5-phosphoribosyl-1-pyrophosphate, which is necessary for purine metabolism and nucleotide biosynthesis. Defects in this gene are a cause of phosphoribosylpyrophosphate synthetase superactivity, Charcot-Marie-Tooth disease X-linked recessive type 5 and Arts Syndrome. Two transcript variants encoding differe…	163	114.015	1	Catalyzes the synthesis of phosphoribosylpyrophosphate (PRPP) that is essential for nucleotide synthesis.	2H06,2H07,2H08,2HCR,3EFH,3S5J,4F8E,4LYG,4LZN,4LZO,4M0P,4M0U
3963	P21108	PRPS1L1	Kinase	Tdark	Ribose-phosphate pyrophosphokinase 3	Kinase	0.0252753	This intronless gene is specifically expressed in the testis, and encodes a protein that is highly homologous to the two subunits of phosphoribosylpyrophosphate synthetase encoded by human X-linked genes, PRPS1 and PRPS2. These enzymes convert pyrimidine, purine or pyridine bases to the corresponding ribonucleoside monophosphates. In vitro transcription/translation and site-directed mutagenesis s…	0	49.8882	0.5	Catalyzes the synthesis of phosphoribosylpyrophosphate (PRPP) that is essential for nucleotide synthesis.
3975	Q9HBY8	SGK2	Kinase	Tchem	Serine/threonine-protein kinase Sgk2	Kinase	0.0648804	This gene encodes a serine/threonine protein kinase. Although this gene product is similar to serum- and glucocorticoid-induced protein kinase (SGK), this gene is not induced by serum or glucocorticoids. This gene is induced in response to signals that activate phosphatidylinositol 3-kinase, which is also true for SGK. Alternative splicing results in multiple transcript variants. [provided by Ref…	282	13.8738	0.2	Serine/threonine-protein kinase which is involved in the regulation of a wide variety of ion channels, membrane transporters, cell growth, survival and proliferation. Up-regulates Na(+) channels: SCNN1A/ENAC, K(+) channels: KCNA3/Kv1.3, KCNE1 and KCNQ1, amino acid transporter: SLC6A19, glutamate transporter: SLC1A6/EAAT4, glutamate receptors: GRIA1/GLUR1 and GRIK2/GLUR6, Na(+)/H(+) exchanger: SLC…
3997	Q96SB4	SRPK1	Kinase	Tchem	SRSF protein kinase 1	Kinase	0.0106666	This gene encodes a serine/arginine protein kinase specific for the SR (serine/arginine-rich domain) family of splicing factors. The protein localizes to the nucleus and the cytoplasm. It is thought to play a role in regulation of both constitutive and alternative splicing by regulating intracellular localization of splicing factors. Alternative splicing of this gene results in multiple transcrip…	422	146.158	1	Serine/arginine-rich protein-specific kinase which specifically phosphorylates its substrates at serine residues located in regions rich in arginine/serine dipeptides, known as RS domains and is involved in the phosphorylation of SR splicing factors and the regulation of splicing. Plays a central role in the regulatory network for splicing, controlling the intranuclear distribution of splicing fa…	1WAK,1WBP,3BEG,4WUA,5MXX,5MY8,5NNG,5XV7
4020	Q9BXS9	SLC26A6	Ion Channel	Tbio	Solute carrier family 26 member 6	IC	0.00922143	This gene belongs to the solute carrier 26 family, whose members encode anion transporter proteins. This particular family member encodes a protein involved in transporting chloride, oxalate, sulfate and bicarbonate. Alternatively spliced transcript variants encoding distinct isoforms have been described. [provided by RefSeq, Aug 2013]	167	120.721	0.166667	Apical membrane anion-exchanger with wide epithelial distribution that plays a role as a component of the pH buffering system for maintaining acid-base homeostasis. Acts as a versatile DIDS-sensitive inorganic and organic anion transporter that mediates the uptake of monovalent anions like chloride, bicarbonate, formate and hydroxyl ion and divalent anions like sulfate and oxalate. Function in mu…
4043	Q8IWT1	SCN4B	Ion Channel	Tbio	Sodium channel subunit beta-4	IC	0.0250511	The protein encoded by this gene is one of several sodium channel beta subunits. These subunits interact with voltage-gated alpha subunits to change sodium channel kinetics. The encoded transmembrane protein forms interchain disulfide bonds with SCN2A. Defects in this gene are a cause of long QT syndrome type 10 (LQT10). Three protein-coding and one non-coding transcript variant have been found f…	118	47.4806	1	Modulates channel gating kinetics. Causes negative shifts in the voltage dependence of activation of certain alpha sodium channels, but does not affect the voltage dependence of inactivation. Modulates the susceptibility of the sodium channel to inhibition by toxic peptides from spider, scorpion, wasp and sea anemone venom.	4MZ2,4MZ3,5XAW
4061	P21817	RYR1	Ion Channel	Tclin	Ryanodine receptor 1	IC	0.00077827	This gene encodes a ryanodine receptor found in skeletal muscle. The encoded protein functions as a calcium release channel in the sarcoplasmic reticulum but also serves to connect the sarcoplasmic reticulum and transverse tubule. Mutations in this gene are associated with malignant hyperthermia susceptibility, central core disease, and minicore myopathy with external ophthalmoplegia. Alternative…	152	1494.39	2	Calcium channel that mediates the release of Ca(2+) from the sarcoplasmic reticulum into the cytoplasm and thereby plays a key role in triggering muscle contraction following depolarization of T-tubules (PubMed:11741831, PubMed:16163667). Repeated very high-level exercise increases the open probability of the channel and leads to Ca(2+) leaking into the cytoplasm (PubMed:18268335). Can also media…
4107	P37088	SCNN1A	Ion Channel	Tclin	Amiloride-sensitive sodium channel subunit alpha	IC	0.00900102	Nonvoltage-gated, amiloride-sensitive, sodium channels control fluid and electrolyte transport across epithelia in many organs. These channels are heteromeric complexes consisting of 3 subunits: alpha, beta, and gamma. This gene encodes the alpha subunit, and mutations in this gene have been associated with pseudohypoaldosteronism type 1 (PHA1), a rare salt wasting disease resulting from target o…	254	131.133	0.25	Sodium permeable non-voltage-sensitive ion channel inhibited by the diuretic amiloride. Mediates the electrodiffusion of the luminal sodium (and water, which follows osmotically) through the apical membrane of epithelial cells. Plays an essential role in electrolyte and blood pressure homeostasis, but also in airway surface liquid homeostasis, which is important for proper clearance of mucus. Con…	2M3O
4109	P51170	SCNN1G	Ion Channel	Tclin	Amiloride-sensitive sodium channel subunit gamma	IC	0.00689941	Nonvoltage-gated, amiloride-sensitive, sodium channels control fluid and electrolyte transport across epithelia in many organs. These channels are heteromeric complexes consisting of 3 subunits: alpha, beta, and gamma. This gene encodes the gamma subunit, and mutations in this gene have been associated with Liddle syndrome. [provided by RefSeq, Apr 2009]	348	201.312	0.25	Sodium permeable non-voltage-sensitive ion channel inhibited by the diuretic amiloride. Mediates the electrodiffusion of the luminal sodium (and water, which follows osmotically) through the apical membrane of epithelial cells. Plays an essential role in electrolyte and blood pressure homeostasis, but also in airway surface liquid homeostasis, which is important for proper clearance of mucus. Con…
4110	Q99250	SCN2A	Ion Channel	Tclin	Sodium channel protein type 2 subunit alpha	IC	0.0007317	Voltage-gated sodium channels are transmembrane glycoprotein complexes composed of a large alpha subunit with four repeat domains, each of which is composed of six membrane-spanning segments, and one or more regulatory beta subunits. Voltage-gated sodium channels function in the generation and propagation of action potentials in neurons and muscle. This gene encodes one member of the sodium chann…	146	748.68	1	Mediates the voltage-dependent sodium ion permeability of excitable membranes. Assuming opened or closed conformations in response to the voltage difference across the membrane, the protein forms a sodium-selective channel through which Na(+) ions may pass in accordance with their electrochemical gradient.	2KAV,4JPZ,4RLY
4159	Q15413	RYR3	Ion Channel	Tclin	Ryanodine receptor 3	IC	0.0048487	The protein encoded by this gene is a ryanodine receptor, which functions to release calcium from intracellular storage for use in many cellular processes. For example, the encoded protein is involved in skeletal muscle contraction by releasing calcium from the sarcoplasmic reticulum followed by depolarization of T-tubules. Two transcript variants encoding different isoforms have been found for t…	24	220.485	0.142857	Calcium channel that mediates the release of Ca(2+) from the sarcoplasmic reticulum into the cytoplasm in muscle and thereby plays a role in triggering muscle contraction. May regulate Ca(2+) release by other calcium channels. Calcium channel that mediates Ca(2+)-induced Ca(2+) release from the endoplasmic reticulum in non-muscle cells. Contributes to cellular calcium ion homeostasis (By similari…	4ERV
4199	Q9H228	S1PR5	GPCR	Tclin	Sphingosine 1-phosphate receptor 5	GPCR	0.0103205	The lysosphingolipid sphingosine 1-phosphate (S1P) regulates cell proliferation, apoptosis, motility, and neurite retraction. Its actions may be both intracellular as a second messenger and extracellular as a receptor ligand. S1P and the structurally related lysolipid mediator lysophosphatidic acid (LPA) signal cells through a set of G protein-coupled receptors known as EDG receptors. Some EDG re…	365	97.4914	0.142857	Receptor for the lysosphingolipid sphingosine 1-phosphate (S1P). S1P is a bioactive lysophospholipid that elicits diverse physiological effect on most types of cells and tissues. Is coupled to both the G(i/0)alpha and G(12) subclass of heteromeric G-proteins (By similarity). May play a regulatory role in the transformation of radial glial cells into astrocytes and may affect proliferative activit…
4209	Q9H2B4	SLC26A1	Ion Channel	Tbio	Sulfate anion transporter 1		0.0345921	This gene is a member of a family of sulfate/anion transporter genes. Family members are well conserved in their genomic (number and size of exons) and protein (aa length among species) structures, but have markedly different tissue expression patterns. This gene is primarily expressed in the liver, pancreas, and brain. Three splice variants that encode different isoforms have been identified. [p…	93	38.4276	1	Mediates sulfate transport with high affinity (PubMed:12713736). Mediates oxalate transport (PubMed:12713736). Mediates bicarbonate transport (By similarity). Does not accept succinate as cosubstrate (By similarity).
4222	Q9HBX9	RXFP1	GPCR	Tchem	Relaxin receptor 1	GPCR	0.00580827	This gene encodes a member of the leucine-rich repeat-containing subgroup of the G protein-coupled 7-transmembrane receptor superfamily. The encoded protein plays a critical role in sperm motility, pregnancy and parturition as a receptor for the protein hormone relaxin. Decreased expression of this gene may play a role in endometriosis. Alternatively spliced transcript variants encoding multiple …	334	222.771	1	Receptor for relaxins. The activity of this receptor is mediated by G proteins leading to stimulation of adenylate cyclase and an increase of cAMP. Binding of the ligand may also activate a tyrosine kinase pathway that inhibits the activity of a phosphodiesterase that degrades cAMP.	2JM4,2M7P
4223	Q8WXD0	RXFP2	GPCR	Tbio	Relaxin receptor 2	GPCR	0.00932189	This gene encodes a member of the GPCR (G protein-coupled, 7-transmembrane receptor) family. Mutations in this gene are associated with cryptorchidism. Alternatively spliced transcript variants encoding different isoforms have been found for this gene.[provided by RefSeq, Oct 2009]	289	119.837	3.55952	Receptor for relaxin. The activity of this receptor is mediated by G proteins leading to stimulation of adenylate cyclase and an increase of cAMP. May also be a receptor for Leydig insulin-like peptide (INSL3).	2M96
4227	Q92736	RYR2	Ion Channel	Tclin	Ryanodine receptor 2	IC	0.00078796	This gene encodes a ryanodine receptor found in cardiac muscle sarcoplasmic reticulum. The encoded protein is one of the components of a calcium channel, composed of a tetramer of the ryanodine receptor proteins and a tetramer of FK506 binding protein 1B proteins, that supplies calcium to cardiac muscle. Mutations in this gene are associated with stress-induced polymorphic ventricular tachycardia…	210	1647.64	0.058824	Calcium channel that mediates the release of Ca(2+) from the sarcoplasmic reticulum into the cytoplasm and thereby plays a key role in triggering cardiac muscle contraction. Aberrant channel activation can lead to cardiac arrhythmia. In cardiac myocytes, calcium release is triggered by increased Ca(2+) levels due to activation of the L-type calcium channel CACNA1C. The calcium channel activity is…	4JKQ
4252	O95136	S1PR2	GPCR	Tchem	Sphingosine 1-phosphate receptor 2	GPCR	0.00372765	This gene encodes a member of the G protein-coupled receptors, as well as the EDG family of proteins. The encoded protein is a receptor for sphingosine 1-phosphate, which participates in cell proliferation, survival, and transcriptional activation. Defects in this gene have been associated with congenital profound deafness. [provided by RefSeq, Mar 2016]	290	374.901	0.25	Receptor for the lysosphingolipid sphingosine 1-phosphate (S1P) (PubMed:10617617). S1P is a bioactive lysophospholipid that elicits diverse physiological effects on most types of cells and tissues (PubMed:10617617). When expressed in rat HTC4 hepatoma cells, is capable of mediating S1P-induced cell proliferation and suppression of apoptosis (PubMed:10617617). Receptor for the chemokine-like prote…	1ZTI
4254	O95977	S1PR4	GPCR	Tclin	Sphingosine 1-phosphate receptor 4	GPCR	0.0152368	This gene is a member of the endothelial differentiation, G-protein-coupled (EDG)) receptor gene family. EDG receptors bind lysophospholipids or lysosphingolipids as ligands, and are involved in cell signalling in many different cell types. This EDG receptor gene is intronless and is specifically expressed in the lymphoid tissue. [provided by RefSeq, Jul 2008]	350	141.978	0.25	Receptor for the lysosphingolipid sphingosine 1-phosphate (S1P). S1P is a bioactive lysophospholipid that elicits diverse physiological effect on most types of cells and tissues. May be involved in cell migration processes that are specific for lymphocytes.	2DCO
4280	P78362	SRPK2	Kinase	Tchem	SRSF protein kinase 2	Kinase	0.0321723		143	34.8981	0.333333	Serine/arginine-rich protein-specific kinase which specifically phosphorylates its substrates at serine residues located in regions rich in arginine/serine dipeptides, known as RS domains and is involved in the phosphorylation of SR splicing factors and the regulation of splicing. Promotes neuronal apoptosis by up-regulating cyclin-D1 (CCND1) expression. This is done by the phosphorylation of SRS…	2X7G,5MYV
4281	Q9UPE1	SRPK3	Kinase	Tchem	SRSF protein kinase 3		0.166395	This gene encodes a protein kinase similar to a protein kinase which is specific for the SR (serine/arginine-rich domain) family of splicing factors. A highly similar protein has been shown to play a role in muscle development in mice. Multiple transcript variants encoding different isoforms have been found for this gene. [provided by RefSeq, Dec 2009]	150	7.24387	0.5	Serine/arginine-rich protein-specific kinase which specifically phosphorylates its substrates at serine residues located in regions rich in arginine/serine dipeptides, known as RS domains. Phosphorylates the SR splicing factor SRSF1 and the lamin-B receptor (LBR) in vitro. Required for normal muscle development (By similarity).
4341	O00141	SGK1	Kinase	Tchem	Serine/threonine-protein kinase Sgk1	Kinase	0.00155681	This gene encodes a serine/threonine protein kinase that plays an important role in cellular stress response. This kinase activates certain potassium, sodium, and chloride channels, suggesting an involvement in the regulation of processes such as cell survival, neuronal excitability, and renal sodium excretion. High levels of expression of this gene may contribute to conditions such as hypertensi…	821	869.929	1	Serine/threonine-protein kinase which is involved in the regulation of a wide variety of ion channels, membrane transporters, cellular enzymes, transcription factors, neuronal excitability, cell growth, proliferation, survival, migration and apoptosis. Plays an important role in cellular stress response. Contributes to regulation of renal Na(+) retention, renal K(+) elimination, salt appetite, ga…	2R5T,3HDM,3HDN
4342	Q96BR1	SGK3	Kinase	Tchem	Serine/threonine-protein kinase Sgk3	Kinase	0.0192424	This locus represents naturally occurring read-through transcription between the neighboring putative uncharacterized protein C8orf44 (GeneID 56260) and serine/threonine-protein kinase Sgk3 (GeneID 23678) genes on chromosome 8. The read-through transcript produces a protein that shares sequence identity with the downstream gene product. [provided by RefSeq, Feb 2011]	312	47.3629	0.052632	Serine/threonine-protein kinase which is involved in the regulation of a wide variety of ion channels, membrane transporters, cell growth, proliferation, survival and migration. Up-regulates Na(+) channels: SCNN1A/ENAC and SCN5A, K(+) channels: KCNA3/KV1.3, KCNE1, KCNQ1 and KCNH2/HERG, epithelial Ca(2+) channels: TRPV5 and TRPV6, chloride channel: BSND, creatine transporter: SLC6A8, Na(+)/dicarbo…	6EDX
4381	O14730	RIOK3	Kinase	Tchem	Serine/threonine-protein kinase RIO3		0.0751395	This gene was first identified by the similarity of its product to the Aspergillus nidulans SUDD protein. This gene is now recognized as a member of the right open reading frame (RIO) kinase gene family. This gene encodes a serine/threonine kinase that localizes to the cytoplasm and plays a role in the processing of the pre-40 S ribosomal subunit. Alternative splicing results in multiple transcri…	172	33.1387	1	Involved in regulation of type I interferon (IFN)-dependent immune response which plays a critical role in the innate immune response against DNA and RNA viruses. May act as an adapter protein essential for the recruitment of TBK1 to IRF3 (PubMed:24807708). Phosphorylates IFIH1 on 'Ser-828' interfering with IFIH1 filament assembly on long dsRNA and resulting in attenuated IFIH1-signaling (PubMed:…
4397	Q9H3Y6	SRMS	Kinase	Tchem	Tyrosine-protein kinase Srms	Kinase	0.221517		173	14.9377	1.5	Non-receptor tyrosine-protein kinase which phosphorylates DOK1 on tyrosine residues (PubMed:23822091). Also phosphorylates KHDRBS1/SAM68 and VIM on tyrosine residues (PubMed:29496907). Phosphorylation of KHDRBS1 is EGF-dependent (PubMed:29496907).
4422	P12931	SRC	Kinase	Tclin	Proto-oncogene tyrosine-protein kinase Src	Kinase	8.479e-05	This gene is highly similar to the v-src gene of Rous sarcoma virus. This proto-oncogene may play a role in the regulation of embryonic development and cell growth. The protein encoded by this gene is a tyrosine-protein kinase whose activity can be inhibited by phosphorylation by c-SRC kinase. Mutations in this gene could be involved in the malignant progression of colon cancer. Two transcript va…	1782	11839.8	0.2	Non-receptor protein tyrosine kinase which is activated following engagement of many different classes of cellular receptors including immune response receptors, integrins and other adhesion receptors, receptor protein tyrosine kinases, G protein-coupled receptors as well as cytokine receptors. Participates in signaling pathways that control a diverse spectrum of biological activities including g…	1A07,1A08,1A09,1A1A,1A1B,1A1C,1A1E,1FMK,1HCS,1HCT,1KSW,1O41,1O42,1O43,1O44,1O45,1O46,1O47,1O48,1O49,1O4A,1O4B,1O4C,1O4D,1O4E,1O4F,1O4G,1O4H,1O4I,1O4J,1O4K,1O4L,1O4M,1O4N,1O4O,1O4P,1O4Q,1O4R,1SHD,1Y57,1YI6,1YOJ,1YOL,1YOM,2BDF,2BDJ,2H8H,2SRC,3VRO,3ZMP,3ZMQ,4F59,4F5A,4F5B,4HXJ,4K11,4MXO,4MXX,4MXY,4MXZ
4428	Q01973	ROR1	Kinase	Tbio	Inactive tyrosine-protein kinase transmembrane receptor ROR1	Kinase	0.0303896	This gene encodes a receptor tyrosine kinase-like orphan receptor that modulates neurite growth in the central nervous system. The encoded protein is a glycosylated type I membrane protein that belongs to the ROR subfamily of cell surface receptors. It is a pseudokinase that lacks catalytic activity and may interact with the non-canonical Wnt signalling pathway. This gene is highly expressed duri…	540	55.037	0.125	Has very low kinase activity in vitro and is unlikely to function as a tyrosine kinase in vivo (PubMed:25029443). Receptor for ligand WNT5A which activate downstream NFkB signaling pathway and may result in the inhibition of WNT3A-mediated signaling (PubMed:25029443, PubMed:27162350). In inner ear, crucial for spiral ganglion neurons to innervate auditory hair cells (PubMed:27162350).	5Z55,6BA5,6BAN
4439	O75116	ROCK2	Kinase	Tclin	Rho-associated protein kinase 2	Kinase	0.00242311	The protein encoded by this gene is a serine/threonine kinase that regulates cytokinesis, smooth muscle contraction, the formation of actin stress fibers and focal adhesions, and the activation of the c-fos serum response element. This protein, which is an isozyme of ROCK1 is a target for the small GTPase Rho. [provided by RefSeq, Jul 2008]	625	494.657	0.2	Protein kinase which is a key regulator of actin cytoskeleton and cell polarity. Involved in regulation of smooth muscle contraction, actin cytoskeleton organization, stress fiber and focal adhesion formation, neurite retraction, cell adhesion and motility via phosphorylation of ADD1, BRCA2, CNN1, EZR, DPYSL2, EP300, MSN, MYL9/MLC2, NPM1, RDX, PPP1R12A and VIM. Phosphorylates SORL1 and IRF4. Acts…	4L6Q,4WOT,5U7Q,5U7R
4513	P0C263	SBK2	Kinase	Tdark	Serine/threonine-protein kinase SBK2		0.274667		45	6.47274	0.333333
4521	Q05823	RNASEL	Kinase	Tchem	2-5A-dependent ribonuclease		0.00165549	This gene encodes a component of the interferon-regulated 2-5A system that functions in the antiviral and antiproliferative roles of interferons. Mutations in this gene have been associated with predisposition to prostate cancer and this gene is a candidate for the hereditary prostate cancer 1 (HPC1) allele. [provided by RefSeq, Jul 2008]	196	682.296	0.333333	Endoribonuclease that functions in the interferon (IFN) antiviral response. In INF treated and virus infected cells, RNASEL probably mediates its antiviral effects through a combination of direct cleavage of single-stranded viral RNAs, inhibition of protein synthesis through the degradation of rRNA, induction of apoptosis, and induction of other antiviral genes. RNASEL mediated apoptosis is the r…	1WDY,4G8K,4G8L,4OAU,4OAV
4529	Q52WX2	SBK1	Kinase	Tchem	Serine/threonine-protein kinase SBK1		0.0522772		20	31.1838	0.333333	May be involved in signal-transduction pathways related to the control of brain development.
4534	Q04912	MST1R	Kinase	Tchem	Macrophage-stimulating protein receptor	Kinase	0.002318	This gene encodes a cell surface receptor for macrophage-stimulating protein (MSP) with tyrosine kinase activity. The mature form of this protein is a heterodimer of disulfide-linked alpha and beta subunits, generated by proteolytic cleavage of a single-chain precursor. The beta subunit undergoes tyrosine phosphorylation upon stimulation by MSP. This protein is expressed on the ciliated epithelia…	831	676.934	0.5	Receptor tyrosine kinase that transduces signals from the extracellular matrix into the cytoplasm by binding to MST1 ligand. Regulates many physiological processes including cell survival, migration and differentiation. Ligand binding at the cell surface induces autophosphorylation of RON on its intracellular domain that provides docking sites for downstream signaling molecules. Following activat…	3PLS,4FWW,4QT8
4535	Q01974	ROR2	Kinase	Tbio	Tyrosine-protein kinase transmembrane receptor ROR2	Kinase	0.0169859	The protein encoded by this gene is a receptor protein tyrosine kinase and type I transmembrane protein that belongs to the ROR subfamily of cell surface receptors. The protein may be involved in the early formation of the chondrocytes and may be required for cartilage and growth plate development. Mutations in this gene can cause brachydactyly type B, a skeletal disorder characterized by hypopla…	588	85.8033	0.333333	Tyrosine-protein kinase receptor which may be involved in the early formation of the chondrocytes. It seems to be required for cartilage and growth plate development (By similarity). Phosphorylates YWHAB, leading to induction of osteogenesis and bone formation (PubMed:17717073). In contrast, has also been shown to have very little tyrosine kinase activity in vitro. May act as a receptor for wnt l…	3ZZW,4GT4
4554	P34925	RYK	Kinase	Tbio	Tyrosine-protein kinase RYK	Kinase	0.00910227	The protein encoded by this gene is an atypical member of the family of growth factor receptor protein tyrosine kinases, differing from other members at a number of conserved residues in the activation and nucleotide binding domains. This gene product belongs to a subfamily whose members do not appear to be regulated by phosphorylation in the activation segment. It has been suggested that mediati…	0	129.383	0.25	May be a coreceptor along with FZD8 of Wnt proteins, such as WNT1, WNT3, WNT3A and WNT5A. Involved in neuron differentiation, axon guidance, corpus callosum establishment and neurite outgrowth. In response to WNT3 stimulation, receptor C-terminal cleavage occurs in its transmembrane region and allows the C-terminal intracellular product to translocate from the cytoplasm to the nucleus where it pl…
4671	P0C264	SBK3	Kinase	Tchem	Uncharacterized serine/threonine-protein kinase SBK3		1.61348		18	0.663324
4779	Q9Y6S9	RPS6KL1	Kinase	Tdark	Ribosomal protein S6 kinase-like 1		1.17416		173	0.836941	0.066667
4788	Q13464	ROCK1	Kinase	Tclin	Rho-associated protein kinase 1	Kinase	0.00156045	This gene encodes a protein serine/threonine kinase that is activated when bound to the GTP-bound form of Rho. The small GTPase Rho regulates formation of focal adhesions and stress fibers of fibroblasts, as well as adhesion and aggregation of platelets and lymphocytes by shuttling between the inactive GDP-bound form and the active GTP-bound form. Rho is also essential in cytokinesis and plays a …	605	785.688	0.125	Protein kinase which is a key regulator of actin cytoskeleton and cell polarity. Involved in regulation of smooth muscle contraction, actin cytoskeleton organization, stress fiber and focal adhesion formation, neurite retraction, cell adhesion and motility via phosphorylation of DAPK3, GFAP, LIMK1, LIMK2, MYL9/MLC2, PFN1 and PPP1R12A. Phosphorylates FHOD1 and acts synergistically with it to promo…	1S1C,2ESM,2ETK,2ETR,2V55,3D9V,3NCZ,3NDM,3O0Z,3TV7,3TWJ,3V8S,4L2W,4W7P,4YVC,4YVE,5BML,5F5P,5HVU,5KKS,5KKT,5UZJ,5WNE,5WNF,5WNG,5WNH
4793	P08922	ROS1	Kinase	Tclin	Proto-oncogene tyrosine-protein kinase ROS	Kinase	0.00151582	This proto-oncogene, highly-expressed in a variety of tumor cell lines, belongs to the sevenless subfamily of tyrosine kinase insulin receptor genes. The protein encoded by this gene is a type I integral membrane protein with tyrosine kinase activity. The protein may function as a growth or differentiation factor receptor. [provided by RefSeq, Jul 2008]	594	987.917	0.5	Orphan receptor tyrosine kinase (RTK) that plays a role in epithelial cell differentiation and regionalization of the proximal epididymal epithelium. May activate several downstream signaling pathways related to cell differentiation, proliferation, growth and survival including the PI3 kinase-mTOR signaling pathway. Mediates the phosphorylation of PTPN11, an activator of this pathway. May also ph…	3ZBF,4UXL
4827	Q9UEE5	STK17A	Kinase	Tchem	Serine/threonine-protein kinase 17A		0.0440016	This gene is a member of the DAP kinase-related apoptosis-inducing protein kinase family and encodes an autophosphorylated nuclear protein with a protein kinase domain. The protein has apoptosis-inducing activity. [provided by RefSeq, Jul 2008]	310	26.1702	1	Acts as a positive regulator of apoptosis. Also acts as a regulator of cellular reactive oxygen species.
4833	Q9Y2H1	STK38L	Kinase	Tchem	Serine/threonine-protein kinase 38-like		0.0519322		223	28.0928	0.25	Involved in the regulation of structural processes in differentiating and mature neuronal cells.	5XQZ
4844	O00506	STK25	Kinase	Tchem	Serine/threonine-protein kinase 25	Kinase	0.0322969	This gene encodes a member of the germinal centre kinase III (GCK III) subfamily of the sterile 20 superfamily of kinases. The encoded enzyme plays a role in serine-threonine liver kinase B1 (LKB1) signaling pathway to regulate neuronal polarization and morphology of the Golgi apparatus. The protein is translocated from the Golgi apparatus to the nucleus in response to chemical anoxia and plays a…	241	50.2473	0.2	Oxidant stress-activated serine/threonine kinase that may play a role in the response to environmental stress. Targets to the Golgi apparatus where it appears to regulate protein transport events, cell adhesion, and polarity complexes important for cell migration.	2XIK,3W8H,4NZW
4846	Q9P289	STK26	Kinase	Tchem	Serine/threonine-protein kinase 26	Kinase	0.0363318	The product of this gene is a member of the GCK group III family of kinases, which are a subset of the Ste20-like kinases. The encoded protein contains an amino-terminal kinase domain, and a carboxy-terminal regulatory domain that mediates homodimerization. The protein kinase localizes to the Golgi apparatus and is specifically activated by binding to the Golgi matrix protein GM130. It is also cl…	265	39.0448	0.058824	Mediator of cell growth (PubMed:11641781, PubMed:17360971). Modulates apoptosis (PubMed:11641781, PubMed:17360971). In association with STK24 negatively regulates Golgi reorientation in polarized cell migration upon RHO activation (PubMed:27807006).	3GGF,3W8I,4FZA,4FZD,4FZF,4GEH,5XY9,5YF4
4847	Q9BXU1	STK31	Kinase	Tbio	Serine/threonine-protein kinase 31		0.124059	This gene is similar to a mouse gene that encodes a putative protein kinase with a tudor domain, and shows testis-specific expression. Alternative splicing results in multiple transcript variants encoding different isoforms. [provided by RefSeq, Jul 2008]	219	12.6557	2
4850	O94804	STK10	Kinase	Tchem	Serine/threonine-protein kinase 10	Kinase	0.0153688	This gene encodes a member of the Ste20 family of serine/threonine protein kinases, and is similar to several known polo-like kinase kinases. The protein can associate with and phosphorylate polo-like kinase 1, and overexpression of a kinase-dead version of the protein interferes with normal cell cycle progression. The kinase can also negatively regulate interleukin 2 expression in T-cells via th…	261	92.2917	1	Serine/threonine-protein kinase involved in regulation of lymphocyte migration. Phosphorylates MSN, and possibly PLK1. Involved in regulation of lymphocyte migration by mediating phosphorylation of ERM proteins such as MSN. Acts as a negative regulator of MAP3K1/MEKK1. May also act as a cell cycle regulator by acting as a polo kinase kinase: mediates phosphorylation of PLK1 in vitro; however such…	2J7T,4AOT,4BC6,4EQU,4USD,4USE,5AJQ,5OWQ,5OWR,6EIM,6GTT
4854	O75716	STK16	Kinase	Tchem	Serine/threonine-protein kinase 16	Kinase	0.0149909		267	106.779	0.5	Membrane-associated protein kinase that phosphorylates on serine and threonine residues. In vitro substrates include DRG1, ENO1 and EIF4EBP1. Also autophosphorylates. May be involved in secretory vesicle trafficking or intracellular signaling. May have a role in regulating stromal-epithelial interactions that occur during ductal morphogenesis in the mammary gland. May be involved in TGF-beta sign…	2BUJ
4970	Q7Z4N2	TRPM1	Ion Channel	Tchem	Transient receptor potential cation channel subfamily M member 1	IC	0.00822899	This gene encodes a member of the transient receptor potential melastatin subfamily of transient receptor potential ion channels. The encoded protein is a calcium permeable cation channel that is expressed in melanocytes and may play a role in melanin synthesis. Specific mutations in this gene are the cause autosomal recessive complete congenital stationary night blindness-1C. The expression of t…	64	135.315	3	Cation channel essential for the depolarizing photoresponse of retinal ON bipolar cells. It is part of the GRM6 signaling cascade. May play a role in metastasis suppression (By similarity). May act as a spontaneously active, calcium-permeable plasma membrane channel.
4971	O94759	TRPM2	Ion Channel	Tchem	Transient receptor potential cation channel subfamily M member 2	IC	0.0076305	The protein encoded by this gene forms a tetrameric cation channel that is permeable to calcium, sodium, and potassium and is regulated by free intracellular ADP-ribose. The encoded protein is activated by oxidative stress and confers susceptibility to cell death. Alternative splicing results in multiple transcript variants encoding distinct protein isoforms. Additional transcript variants of thi…	265	241.96	1	Isoform 1: Nonselective, voltage-independent cation channel that mediates Na(+) and Ca(2+) influx, leading to increased cytoplasmic Ca(2+) levels (PubMed:11960981, PubMed:12594222, PubMed:11385575, PubMed:11509734, PubMed:11804595, PubMed:15561722, PubMed:16601673, PubMed:19171771, PubMed:20660597, PubMed:27383051, PubMed:27068538). Extracellular calcium passes through the channel and increases c…
4972	Q9HCF6	TRPM3	Ion Channel	Tchem	Transient receptor potential cation channel subfamily M member 3	IC	0.00647452	The product of this gene belongs to the family of transient receptor potential (TRP) channels. TRP channels are cation-selective channels important for cellular calcium signaling and homeostasis. The protein encoded by this gene mediates calcium entry, and this entry is potentiated by calcium store depletion. Alternatively spliced transcript variants encoding different isoforms have been identifi…	148	191.104	0.25	Calcium channel mediating constitutive calcium ion entry. Its activity is increased by reduction in extracellular osmolarity, by store depletion and muscarinic receptor activation.
4973	Q8TD43	TRPM4	Ion Channel	Tchem	Transient receptor potential cation channel subfamily M member 4	IC	0.00423106	The protein encoded by this gene is a calcium-activated nonselective ion channel that mediates transport of monovalent cations across membranes, thereby depolarizing the membrane. The activity of the encoded protein increases with increasing intracellular calcium concentration, but this channel does not transport calcium. [provided by RefSeq, Mar 2016]	262	315.796	1	Calcium-activated non selective (CAN) cation channel that mediates membrane depolarization (PubMed:12015988, PubMed:29211723). While it is activated by increase in intracellular Ca(2+), it is impermeable to it (PubMed:12015988). Mediates transport of monovalent cations (Na(+) > K(+) > Cs(+) > Li(+)), leading to depolarize the membrane. It thereby plays a central role in cadiomyocytes, neurons fro…	5WP6,6BQR,6BQV
4974	Q9NZQ8	TRPM5	Ion Channel	Tchem	Transient receptor potential cation channel subfamily M member 5	IC	0.00708583	This gene encodes a member of the transient receptor potential (TRP) protein family, which is a diverse group of proteins with structural features typical of ion channels. This protein plays an important role in taste transduction, and has characteristics of a calcium-activated, non-selective cation channel that carries Na+, K+, and Cs+ ions equally well, but not Ca(2+) ions. It is activated by l…	147	170.551	1	Voltage-modulated Ca(2+)-activated, monovalent cation channel (VCAM) that mediates a transient membrane depolarization and plays a central role in taste transduction. Monovalent-specific, non-selective cation channel that mediates the transport of Na(+), K(+) and Cs(+) ions equally well. Activated directly by increases in intracellular Ca(2+), but is impermeable to it. Gating is voltage-dependent…
4975	Q9BX84	TRPM6	Kinase	Tchem	Transient receptor potential cation channel subfamily M member 6	Kinase	0.00594821	This gene is predominantly expressed in the kidney and colon, and encodes a protein containing an ion channel domain and a protein kinase domain. It is crucial for magnesium homeostasis, and plays an essential role in epithelial magnesium transport and in the active magnesium absorption in the gut and kidney. Mutations in this gene are associated with hypomagnesemia with secondary hypocalcemia. A…	122	220.146	1	Essential ion channel and serine/threonine-protein kinase. Crucial for magnesium homeostasis. Has an important role in epithelial magnesium transport and in the active magnesium absorption in the gut and kidney. Isoforms of the type M6-kinase lack the ion channel region.
4976	Q96QT4	TRPM7	Ion Channel	Tchem	Transient receptor potential cation channel subfamily M member 7	IC	0.00265096	This gene belongs to the melastatin subfamily of transient receptor potential family of ion channels. The protein encoded by this gene is both an ion channel and a serine/threonine protein kinase. The kinase activity is essential for the ion channel function, which serves to increase intracellular calcium levels and to help regulate magnesium ion homeostasis. The encoded protein is involved in cy…	421	540.227	1	Essential ion channel and serine/threonine-protein kinase. Divalent cation channel permeable to calcium and magnesium. Has a central role in magnesium ion homeostasis and in the regulation of anoxic neuronal cell death. Involved in TNF-induced necroptosis downstream of MLKL by mediating calcium influx. The kinase activity is essential for the channel function. May be involved in a fundamental pro…
4993	P30872	SSTR1	GPCR	Tclin	Somatostatin receptor type 1	GPCR	0.00588024	Somatostatins are peptide hormones that regulate diverse cellular functions such as neurotransmission, cell proliferation, and endocrine signaling as well as inhibiting the release of many hormones and other secretory proteins. Somatostatin has two active forms of 14 and 28 amino acids. The biological effects of somatostatins are mediated by a family of G-protein coupled somatostatin receptors th…	400	162.867	1.86667	Receptor for somatostatin with higher affinity for somatostatin-14 than -28. This receptor is coupled via pertussis toxin sensitive G proteins to inhibition of adenylyl cyclase. In addition it stimulates phosphotyrosine phosphatase and Na(+)/H(+) exchanger via pertussis toxin insensitive G proteins.
5018	Q86UX6	STK32C	Kinase	Tbio	Serine/threonine-protein kinase 32C		0.0832547	The protein encoded by this gene is a member of the serine/threonine protein kinase family. It is thought that this family member is functional in brain due to its high expression levels there. DNA methylation differences have been found in this gene in monozygotic twins that are discordant for adolescent depression. Alternative splicing results in multiple transcript variants. [provided by RefSe…	122	19.3864	1
5032	Q9BYT3	STK33	Kinase	Tchem	Serine/threonine-protein kinase 33		0.0505187		389	28.7826	1	Serine/threonine protein kinase which phosphorylates VIME. May play a specific role in the dynamic behavior of the intermediate filament cytoskeleton by phosphorylation of VIME (By similarity). Not essential for the survival of KRAS-dependent AML cell lines.
5033	Q9UEW8	STK39	Kinase	Tchem	STE20/SPS1-related proline-alanine-rich protein kinase	Kinase	0.00548476	This gene encodes a serine/threonine kinase that is thought to function in the cellular stress response pathway. The kinase is activated in response to hypotonic stress, leading to phosphorylation of several cation-chloride-coupled cotransporters. The catalytically active kinase specifically activates the p38 MAP kinase pathway, and its interaction with p38 decreases upon cellular stress, suggest…	703	228.895	1	May act as a mediator of stress-activated signals. Mediates the inhibition of SLC4A4, SLC26A6 as well as CFTR activities by the WNK scaffolds, probably through phosphorylation. Phosphorylates RELT.
5034	Q13188	STK3	Kinase	Tchem	Serine/threonine-protein kinase 3		0.0529257	This gene encodes a serine/threonine protein kinase activated by proapoptotic molecules indicating the encoded protein functions as a growth suppressor. Cleavage of the protein product by caspase removes the inhibitory C-terminal portion. The N-terminal portion is transported to the nucleus where it homodimerizes to form the active kinase which promotes the condensation of chromatin during apopto…	424	16.7269	0.1	Stress-activated, pro-apoptotic kinase which, following caspase-cleavage, enters the nucleus and induces chromatin condensation followed by internucleosomal DNA fragmentation. Key component of the Hippo signaling pathway which plays a pivotal role in organ size control and tumor suppression by restricting proliferation and promoting apoptosis. The core of this pathway is composed of a kinase casc…	3WWS,4HKD,4L0N,4LG4,4LGD,4OH9,5BRM,5DH3,6AO5,6AR2
5036	Q15831	STK11	Kinase	Tchem	Serine/threonine-protein kinase STK11	Kinase	0.00073247	This gene, which encodes a member of the serine/threonine kinase family, regulates cell polarity and functions as a tumor suppressor. Mutations in this gene have been associated with Peutz-Jeghers syndrome, an autosomal dominant disorder characterized by the growth of polyps in the gastrointestinal tract, pigmented macules on the skin and mouth, and other neoplasms. Alternate transcriptional spli…	1199	1777.87	0.1	Tumor suppressor serine/threonine-protein kinase that controls the activity of AMP-activated protein kinase (AMPK) family members, thereby playing a role in various processes such as cell metabolism, cell polarity, apoptosis and DNA damage response. Acts by phosphorylating the T-loop of AMPK family proteins, thus promoting their activity: phosphorylates PRKAA1, PRKAA2, BRSK1, BRSK2, MARK1, MARK2,…	2WTK,4ZDR,5WXN
5037	P49842	STK19	Kinase	Tchem	Serine/threonine-protein kinase 19		0.00766725	This gene encodes a serine/threonine kinase which localizes predominantly to the nucleus. Its specific function is unknown; it is possible that phosphorylation of this protein is involved in transcriptional regulation. This gene localizes to the major histocompatibility complex (MHC) class III region on chromosome 6 and expresses two transcript variants. [provided by RefSeq, Jul 2008]	182	169.082	1	Seems to be a protein kinase. In vitro it can phosphorylate casein-alpha on serine and threonine residues and histones on serine residues.
5043	Q7RTN6	STRADA	Kinase	Tbio	STE20-related kinase adapter protein alpha	Kinase	0.0190243	The protein encoded by this gene contains a STE20-like kinase domain, but lacks several residues that are critical for catalytic activity, so it is termed a 'pseudokinase'. The protein forms a heterotrimeric complex with serine/threonine kinase 11 (STK11, also known as LKB1) and the scaffolding protein calcium binding protein 39 (CAB39, also known as MO25). The protein activates STK11 leading to …	301	56.7487	1	Pseudokinase which, in complex with CAB39/MO25 (CAB39/MO25alpha or CAB39L/MO25beta), binds to and activates STK11/LKB1. Adopts a closed conformation typical of active protein kinases and binds STK11/LKB1 as a pseudosubstrate, promoting conformational change of STK11/LKB1 in an active conformation.	1UPK,2WTK,3GNI
5055	P30874	SSTR2	GPCR	Tclin	Somatostatin receptor type 2	GPCR	0.00200092	Somatostatin acts at many sites to inhibit the release of many hormones and other secretory proteins. The biologic effects of somatostatin are probably mediated by a family of G protein-coupled receptors that are expressed in a tissue-specific manner. SSTR2 is a member of the superfamily of receptors having seven transmembrane segments and is expressed in highest levels in cerebrum and kidney. [p…	348	692.276	0.071429	Receptor for somatostatin-14 and -28. This receptor is coupled via pertussis toxin sensitive G proteins to inhibition of adenylyl cyclase. In addition it stimulates phosphotyrosine phosphatase and PLC via pertussis toxin insensitive as well as sensitive G proteins. Inhibits calcium entry by suppressing voltage-dependent calcium channels. Acts as the functionally dominant somatostatin receptor in …
5056	P32745	SSTR3	GPCR	Tclin	Somatostatin receptor type 3	GPCR	0.00899073	This gene encodes a member of the somatostatin receptor protein family. Somatostatins are peptide hormones that regulate diverse cellular functions such as neurotransmission, cell proliferation, and endocrine signaling as well as inhibiting the release of many hormones and other secretory proteins. Somatostatin has two active forms of 14 and 28 amino acids. The biological effects of somatostatins…	153	109.546	0.071429	Receptor for somatostatin-14 and -28. This receptor is coupled via pertussis toxin sensitive G proteins to inhibition of adenylyl cyclase.
5057	P31391	SSTR4	GPCR	Tclin	Somatostatin receptor type 4	GPCR	0.0152824	Somatostatin acts at many sites to inhibit the release of many hormones and other secretory proteins. The biologic effects of somatostatin are probably mediated by a family of G protein-coupled receptors that are expressed in a tissue-specific manner. SSTR4 is a member of the superfamily of receptors having seven transmembrane segments and is expressed in highest levels in fetal and adult brain a…	207	63.8252	0.071429	Receptor for somatostatin-14. The activity of this receptor is mediated by G proteins which inhibits adenylyl cyclase. It is functionally coupled not only to inhibition of adenylate cyclase, but also to activation of both arachidonate release and mitogen-activated protein (MAP) kinase cascade. Mediates antiproliferative action of somatostatin in tumor cells.
5060	P35346	SSTR5	GPCR	Tclin	Somatostatin receptor type 5	GPCR	0.00568309	Somatostatin and its related peptide cortistatin exert multiple biological actions on normal and tumoral tissue targets by interacting with somatostatin receptors (SSTRs). The protein encoded by this gene is one of the SSTRs, which is a multi-pass membrane protein and belongs to the G-protein coupled receptor 1 family. The activity of this receptor is mediated by G proteins which inhibit adenylyl…	275	180.994	0.385965	Receptor for somatostatin 28 and to a lesser extent for somatostatin-14. The activity of this receptor is mediated by G proteins which inhibit adenylyl cyclase. Increases cell growth inhibition activity of SSTR2 following heterodimerization.
5092	O94768	STK17B	Kinase	Tchem	Serine/threonine-protein kinase 17B		0.0420158		403	38.2241	0.333333	Phosphorylates myosin light chains (By similarity). Acts as a positive regulator of apoptosis.	3LM0,3LM5
5094	Q9NY57	STK32B	Kinase	Tchem	Serine/threonine-protein kinase 32B		0.189243	This gene encodes a serine-threonine protein kinase. Serine-threonine kinases transfer phosphate molecules to the oxygen atoms of serine and threonine. A genomic deletion affecting this gene has been associated with Ellis-van Creveld syndrome, an autosomal recessive skeletal dysplasia. Alternative splicing results in multiple transcript variants. [provided by RefSeq, Sep 2016]	116	6.7278	0.333333
5108	Q9NRA0	SPHK2	Kinase	Tchem	Sphingosine kinase 2	Kinase	0.00454527	This gene encodes one of two sphingosine kinase isozymes that catalyze the phosphorylation of sphingosine into sphingosine 1-phosphate. Sphingosine 1-phosphate mediates many cellular processes including migration, proliferation and apoptosis, and also plays a role in several types of cancer by promoting angiogenesis and tumorigenesis. The encoded protein may play a role in breast cancer prolifera…	399	290.995	0.333333	Catalyzes the phosphorylation of sphingosine to form sphingosine 1-phosphate (SPP), a lipid mediator with both intra- and extracellular functions. Also acts on D-erythro-dihydrosphingosine, D-erythro-sphingosine and L-threo-dihydrosphingosine. Binds phosphoinositides.
5125	Q9BXA5	SUCNR1	GPCR	Tchem	Succinate receptor 1		0.0148289	This gene encodes a G-protein-coupled receptor for succinate, an intermediate molecule of the citric acid cycle. It is involved in the promotion of hematopoietic progenitor cell development, and it has a potential role in renovascular hypertension which has known correlations to renal failure, diabetes and atherosclerosis. [provided by RefSeq, Oct 2009]	235	119.831	0.166667	Receptor for succinate.
5162	Q9Y6E0	STK24	Kinase	Tchem	Serine/threonine-protein kinase 24	Kinase	0.00457236	This gene encodes a serine/threonine protein kinase that functions upstream of mitogen-activated protein kinase (MAPK) signaling. The encoded protein is cleaved into two chains by caspases; the N-terminal fragment (MST3/N) translocates to the nucleus and promotes programmed cells death. There is a pseudogene for this gene on chromosome X. Alternative splicing results in multiple transcript varian…	315	184.349	0.125	Serine/threonine-protein kinase that acts on both serine and threonine residues and promotes apoptosis in response to stress stimuli and caspase activation. Mediates oxidative-stress-induced cell death by modulating phosphorylation of JNK1-JNK2 (MAPK8 and MAPK9), p38 (MAPK11, MAPK12, MAPK13 and MAPK14) during oxidative stress. Plays a role in a staurosporine-induced caspase-independent apoptotic …	3A7F,3A7G,3A7H,3A7I,3A7J,3CKW,3CKX,3ZHP,4O27,4QML,4QMM,4QMN,4QMO,4QMP,4QMQ,4QMS,4QMT,4QMU,4QMV,4QMW,4QMX,4QMY,4QMZ,4QNA,4QO9,4U8Z,4W8D,4W8E
5163	Q8TDR2	STK35	Kinase	Tchem	Serine/threonine-protein kinase 35	Kinase	0.195561	The protein encoded by this gene is a kinase that is predominantly found in the nucleus. However, it can interact with PDLIM1/CLP-36 in the cytoplasm and localize to actin stress fibers. The encoded protein may be a regulator of actin stress fibers in nonmuscle cells. [provided by RefSeq, Jul 2008]	170	12.5046	0.333333
5164	Q9NRP7	STK36	Kinase	Tbio	Serine/threonine-protein kinase 36		0.0963277	This gene encodes a member of the serine/threonine kinase family of enzymes. This family member is similar to a Drosophila protein that plays a key role in the Hedgehog signaling pathway. This human protein is a positive regulator of the GLI zinc-finger transcription factors. Knockout studies of the homologous mouse gene suggest that defects in this human gene may lead to congenital hydrocephalus…	166	10.2633	0.25	Serine/threonine protein kinase which plays an important role in the sonic hedgehog (Shh) pathway by regulating the activity of GLI transcription factors (PubMed:10806483). Controls the activity of the transcriptional regulators GLI1, GLI2 and GLI3 by opposing the effect of SUFU and promoting their nuclear localization (PubMed:10806483). GLI2 requires an additional function of STK36 to become tra…
5165	Q15208	STK38	Kinase	Tchem	Serine/threonine-protein kinase 38	Kinase	0.0324212	This gene encodes a member of the AGC serine/threonine kinase family of proteins. The kinase activity of this protein is regulated by autophosphorylation and phosphorylation by other upstream kinases. This protein has been shown to function in the cell cycle and apoptosis. This protein has also been found to regulate the protein stability and transcriptional activity of the MYC oncogene. Alternat…	412	40.7152	0.333333	Negative regulator of MAP3K1/2 signaling. Converts MAP3K2 from its phosphorylated form to its non-phosphorylated form and inhibits autophosphorylation of MAP3K2.	1PSB,6BXI
5167	Q8N2I9	STK40	Kinase	Tbio	Serine/threonine-protein kinase 40		0.104617		150	22.8535	1	May be a negative regulator of NF-kappa-B and p53-mediated gene transcription.	5L2Q
5169	Q13043	STK4	Kinase	Tchem	Serine/threonine-protein kinase 4	Kinase	0.0210442	The protein encoded by this gene is a cytoplasmic kinase that is structurally similar to the yeast Ste20p kinase, which acts upstream of the stress-induced mitogen-activated protein kinase cascade. The encoded protein can phosphorylate myelin basic protein and undergoes autophosphorylation. A caspase-cleaved fragment of the encoded protein has been shown to be capable of phosphorylating histone H…	388	75.4143	0.1	Stress-activated, pro-apoptotic kinase which, following caspase-cleavage, enters the nucleus and induces chromatin condensation followed by internucleosomal DNA fragmentation. Key component of the Hippo signaling pathway which plays a pivotal role in organ size control and tumor suppression by restricting proliferation and promoting apoptosis. The core of this pathway is composed of a kinase casc…	2JO8,3COM,4NR2,4OH8,5TWG,5TWH
5171	Q8NE28	STKLD1	Kinase	Tdark	Serine/threonine kinase-like domain-containing protein STKLD1		0.802964		200	1.1394
5174	Q9C0K7	STRADB	Kinase	Tbio	STE20-related kinase adapter protein beta	Kinase	0.0353221	This gene encodes a protein that belongs to the serine/threonine protein kinase STE20 subfamily. One of the active site residues in the protein kinase domain of this protein is altered, and it is thus a pseudokinase. This protein is a component of a complex involved in the activation of serine/threonine kinase 11, a master kinase that regulates cell polarity and energy-generating metabolism. This…	367	26.4535	0.333333	Pseudokinase which, in complex with CAB39/MO25 (CAB39/MO25alpha or CAB39L/MO25beta), binds to and activates STK11/LKB1. Adopts a closed conformation typical of active protein kinases and binds STK11/LKB1 as a pseudosubstrate, promoting conformational change of STK11/LKB1 in an active conformation (By similarity).
5185	Q8TDI8	TMC1	Ion Channel	Tbio	Transmembrane channel-like protein 1	IC	0.00609628	This gene is considered a member of a gene family predicted to encode transmembrane proteins. The specific function of this gene is unknown; however, it is known to be required for normal function of cochlear hair cells. Mutations in this gene have been associated with progressive postlingual hearing loss and profound prelingual deafness. [provided by RefSeq, Jul 2008]	41	237.483	4.5	Probable ion channel required for the normal function of cochlear hair cells.
5186	Q7Z5M5	TMC3	Ion Channel	Tdark	Transmembrane channel-like protein 3		0.237763		13	5.18636	0.2	Probable ion channel.
5187	Q7Z404	TMC4	Ion Channel	Tdark	Transmembrane channel-like protein 4		0.192328		0	11.8752	0.2	Probable ion channel.
5266	P42681	TXK	Kinase	Tchem	Tyrosine-protein kinase TXK	Kinase	0.00278405		244	446.774	1.83333	Non-receptor tyrosine kinase that plays a redundant role with ITK in regulation of the adaptive immune response. Regulates the development, function and differentiation of conventional T-cells and nonconventional NKT-cells. When antigen presenting cells (APC) activate T-cell receptor (TCR), a series of phosphorylation lead to the recruitment of TXK to the cell membrane, where it is phosphorylated…	2DM0
5334	P37288	AVPR1A	GPCR	Tclin	Vasopressin V1a receptor	GPCR	0.00305957	The protein encoded by this gene acts as receptor for arginine vasopressin. This receptor belongs to the subfamily of G-protein coupled receptors which includes AVPR1B, V2R and OXT receptors. Its activity is mediated by G proteins which stimulate a phosphatidylinositol-calcium second messenger system. The receptor mediates cell contraction and proliferation, platelet aggregation, release of coagu…	254	363.349	1	Receptor for arginine vasopressin. The activity of this receptor is mediated by G proteins which activate a phosphatidyl-inositol-calcium second messenger system. Has been involved in social behaviors, including affiliation and attachment.	1YTV
5362	P35916	FLT4	Kinase	Tclin	Vascular endothelial growth factor receptor 3	Kinase	0.001296	This gene encodes a tyrosine kinase receptor for vascular endothelial growth factors C and D. The protein is thought to be involved in lymphangiogenesis and maintenance of the lymphatic endothelium. Mutations in this gene cause hereditary lymphedema type IA. [provided by RefSeq, Jul 2008]	968	812.854	0.5	Tyrosine-protein kinase that acts as a cell-surface receptor for VEGFC and VEGFD, and plays an essential role in adult lymphangiogenesis and in the development of the vascular network and the cardiovascular system during embryonic development. Promotes proliferation, survival and migration of endothelial cells, and regulates angiogenic sprouting. Signaling by activated FLT4 leads to enhanced prod…	4BSJ,4BSK
5367	P07947	YES1	Kinase	Tclin	Tyrosine-protein kinase Yes	Kinase	0.00534936	This gene is the cellular homolog of the Yamaguchi sarcoma virus oncogene. The encoded protein has tyrosine kinase activity and belongs to the src family of proteins. This gene lies in close proximity to thymidylate synthase gene on chromosome 18, and a corresponding pseudogene has been found on chromosome 22. [provided by RefSeq, Jul 2008]	464	245.21	0.142857	Non-receptor protein tyrosine kinase that is involved in the regulation of cell growth and survival, apoptosis, cell-cell adhesion, cytoskeleton remodeling, and differentiation. Stimulation by receptor tyrosine kinases (RTKs) including EGRF, PDGFR, CSF1R and FGFR leads to recruitment of YES1 to the phosphorylated receptor, and activation and phosphorylation of downstream substrates. Upon EGFR act…	2HDA
5379	Q7Z5H5	VN1R4	GPCR	Tbio	Vomeronasal type-1 receptor 4	GPCR	0.559689		112	43.8999	1	Putative pheromone receptor.
5430	Q06418	TYRO3	Kinase	Tchem	Tyrosine-protein kinase receptor TYRO3	Kinase	0.00233016	The gene is part of a 3-member transmembrane receptor kinase receptor family with a processed pseudogene distal on chromosome 15. The encoded protein is activated by the products of the growth arrest-specific gene 6 and protein S genes and is involved in controlling cell survival and proliferation, spermatogenesis, immunoregulation and phagocytosis. The encoded protein has also been identified as…	644	559.461	1	Receptor tyrosine kinase that transduces signals from the extracellular matrix into the cytoplasm by binding to several ligands including TULP1 or GAS6. Regulates many physiological processes including cell survival, migration and differentiation. Ligand binding at the cell surface induces dimerization and autophosphorylation of TYRO3 on its intracellular domain that provides docking sites for do…	1RHF
5431	P29597	TYK2	Kinase	Tclin	Non-receptor tyrosine-protein kinase TYK2	Kinase	0.00237955	This gene encodes a member of the tyrosine kinase and, more specifically, the Janus kinases (JAKs) protein families. This protein associates with the cytoplasmic domain of type I and type II cytokine receptors and promulgate cytokine signals by phosphorylating receptor subunits. It is also component of both the type I and type III interferon signaling pathways. As such, it may play a role in anti…	665	461.706	0.076923	Probably involved in intracellular signal transduction by being involved in the initiation of type I IFN signaling. Phosphorylates the interferon-alpha/beta receptor alpha chain.	3LXN,3LXP,3NYX,3NZ0,3ZON,4GFO,4GIH,4GII,4GJ2,4GJ3,4GVJ,4OLI,4PO6,4PY1,4WOV,5C01,5C03,5F1Z,5F20,5TKD,5WAL,6AAM,6DBK,6DBM
5442	Q8NET8	TRPV3	Ion Channel	Tchem	Transient receptor potential cation channel subfamily V member 3	IC	0.00533583	This gene product belongs to a family of nonselective cation channels that function in a variety of processes, including temperature sensation and vasoregulation. The thermosensitive members of this family are expressed in subsets of sensory neurons that terminate in the skin, and are activated at distinct physiological temperatures. This channel is activated at temperatures between 22 and 40 deg…	384	229.69	0.25	Putative receptor-activated non-selective calcium permeant cation channel. It is activated by innocuous (warm) temperatures and shows an increased response at noxious temperatures greater than 39 degrees Celsius. Activation exhibits an outward rectification. May associate with TRPV1 and may modulate its activity. Is a negative regulator of hair growth and cycling: TRPV3-coupled signaling suppress…	6MHO,6MHS,6MHV,6MHW,6MHX
5461	P42679	MATK	Kinase	Tbio	Megakaryocyte-associated tyrosine-protein kinase	Kinase	0.00068411	The protein encoded by this gene has amino acid sequence similarity to Csk tyrosine kinase and has the structural features of the CSK subfamily: SRC homology SH2 and SH3 domains, a catalytic domain, a unique N terminus, lack of myristylation signals, lack of a negative regulatory phosphorylation site, and lack of an autophosphorylation site. This protein is thought to play a significant role in t…	329	1987.23	1	Could play a significant role in the signal transduction of hematopoietic cells. May regulate tyrosine kinase activity of SRC-family members in brain by specifically phosphorylating their C-terminal regulatory tyrosine residue which acts as a negative regulatory site. It may play an inhibitory role in the control of T-cell proliferation.	1JWO,1X6G,3US4
5482	Q9NWZ3	IRAK4	Kinase	Tchem	Interleukin-1 receptor-associated kinase 4	Kinase	0.00344058	This gene encodes a kinase that activates NF-kappaB in both the Toll-like receptor (TLR) and T-cell receptor (TCR) signaling pathways. The protein is essential for most innate immune responses. Mutations in this gene result in IRAK4 deficiency and recurrent invasive pneumococcal disease. Multiple transcript variants encoding different isoforms have been found for this gene. [provided by RefSeq, A…	712	367.327	0.2	Serine/threonine-protein kinase that plays a critical role in initiating innate immune response against foreign pathogens. Involved in Toll-like receptor (TLR) and IL-1R signaling pathways (PubMed:17878374). Is rapidly recruited by MYD88 to the receptor-signaling complex upon TLR activation to form the Myddosome together with IRAK2. Phosphorylates initially IRAK1, thus stimulating the kinase acti…	2NRU,2NRY,2O8Y,2OIB,2OIC,2OID,3MOP,4RMZ,4U97,4U9A,4XS2,4Y73,4YO6,4YP8,4ZTL,4ZTM,4ZTN,5K72,5K75,5K76,5K7G,5K7I,5KX7,5KX8,5T1S,5T1T,5UIQ,5UIR,5UIS,5UIT,5UIU,5W84,5W85,6F3D,6F3E,6F3G,6F3I
5494	Q9H3N8	HRH4	GPCR	Tchem	Histamine H4 receptor	GPCR	0.0031371	Histamine is a ubiquitous messenger molecule released from mast cells, enterochromaffin-like cells, and neurons. Its various actions are mediated by a family of histamine receptors, which are a subset of the G-protein coupled receptor superfamily. This gene encodes a histamine receptor that is predominantly expressed in haematopoietic cells. The protein is thought to play a role in inflammation a…	276	378.921	0.5	The H4 subclass of histamine receptors could mediate the histamine signals in peripheral tissues. Displays a significant level of constitutive activity (spontaneous activity in the absence of agonist).
5505	Q9UPZ9	CILK1	Kinase	Tchem	Serine/threonine-protein kinase ICK		0.00810476	Eukaryotic protein kinases are enzymes that belong to a very extensive family of proteins which share a conserved catalytic core common with both serine/threonine and tyrosine protein kinases. This gene encodes an intestinal serine/threonine kinase harboring a dual phosphorylation site found in mitogen-activating protein (MAP) kinases. The protein localizes to the intestinal crypt region and is t…	264	191.679	0.25	Required for ciliogenesis (PubMed:24797473). Phosphorylates KIF3A (By similarity). Involved in the control of ciliary length (PubMed:24853502). Regulates the ciliary localization of SHH pathway components as well as the localization of IFT components at ciliary tips (By similarity). May play a key role in the development of multiple organ systems and particularly in cardiac development (By simila…
5522	Q02643	GHRHR	GPCR	Tclin	Growth hormone-releasing hormone receptor	GPCR	0.00637611	This gene encodes a receptor for growth hormone-releasing hormone. Binding of this hormone to the receptor leads to synthesis and release of growth hormone. Mutations in this gene have been associated with isolated growth hormone deficiency (IGHD), also known as Dwarfism of Sindh, a disorder characterized by short stature. [provided by RefSeq, Jun 2010]	290	180.52	0.333333	Receptor for GRF, coupled to G proteins which activate adenylyl cyclase. Stimulates somatotroph cell growth, growth hormone gene transcription and growth hormone secretion.	2XDG
5528	Q9H422	HIPK3	Kinase	Tchem	Homeodomain-interacting protein kinase 3		0.00777446		187	161.954	1	Serine/threonine-protein kinase involved in transcription regulation, apoptosis and steroidogenic gene expression. Phosphorylates JUN and RUNX2. Seems to negatively regulate apoptosis by promoting FADD phosphorylation. Enhances androgen receptor-mediated transcription. May act as a transcriptional corepressor for NK homeodomain transcription factors. The phosphorylation of NR5A1 activates SF1 lea…
5569	Q13418	ILK	Kinase	Tchem	Integrin-linked protein kinase	Kinase	0.00147344	This gene encodes a protein with a kinase-like domain and four ankyrin-like repeats. The encoded protein associates at the cell membrane with the cytoplasmic domain of beta integrins, where it regulates integrin-mediated signal transduction. Activity of this protein is important in the epithelial to mesenchymal transition, and over-expression of this gene is implicated in tumor growth and metasta…	727	944.649	0.142857	Receptor-proximal protein kinase regulating integrin-mediated signal transduction (PubMed:8538749, PubMed:9736715). May act as a mediator of inside-out integrin signaling. Focal adhesion protein part of the complex ILK-PINCH. This complex is considered to be one of the convergence points of integrin- and growth factor-signaling pathway. Could be implicated in mediating cell architecture, adhesion…	2KBX,3F6Q,3IXE,3KMU,3KMW,3REP,4HI8,4HI9
5571	Q9UHH9	IP6K2	Kinase	Tbio	Inositol hexakisphosphate kinase 2	Kinase	0.0500445	This gene encodes a protein that belongs to the inositol phosphokinase (IPK) family. This protein is likely responsible for the conversion of inositol hexakisphosphate (InsP6) to diphosphoinositol pentakisphosphate (InsP7/PP-InsP5). It may also convert 1,3,4,5,6-pentakisphosphate (InsP5) to PP-InsP4 and affect the growth suppressive and apoptotic activities of interferon-beta in some ovarian canc…	187	28.2163	0.5	Converts inositol hexakisphosphate (InsP6) to diphosphoinositol pentakisphosphate (InsP7/PP-InsP5). Converts 1,3,4,5,6-pentakisphosphate (InsP5) to PP-InsP4.
5577	P51617	IRAK1	Kinase	Tchem	Interleukin-1 receptor-associated kinase 1	Kinase	0.00170873	This gene encodes the interleukin-1 receptor-associated kinase 1, one of two putative serine/threonine kinases that become associated with the interleukin-1 receptor (IL1R) upon stimulation. This gene is partially responsible for IL1-induced upregulation of the transcription factor NF-kappa B. Alternatively spliced transcript variants encoding different isoforms have been found for this gene. [pr…	954	642.819	0.166667	Serine/threonine-protein kinase that plays a critical role in initiating innate immune response against foreign pathogens. Involved in Toll-like receptor (TLR) and IL-1R signaling pathways. Is rapidly recruited by MYD88 to the receptor-signaling complex upon TLR activation. Association with MYD88 leads to IRAK1 phosphorylation by IRAK4 and subsequent autophosphorylation and kinase activation. Pho…	6BFN
5589	Q14164	IKBKE	Kinase	Tchem	Inhibitor of nuclear factor kappa-B kinase subunit epsilon	Kinase	0.0144708	IKBKE is a noncanonical I-kappa-B (see MIM 164008) kinase (IKK) that is essential for regulating antiviral signaling pathways. IKBKE has also been identified as a breast cancer (MIM 114480) oncogene and is amplified and overexpressed in over 30% of breast carcinomas and breast cancer cell lines (Hutti et al., 2009 [PubMed 19481526]).[supplied by OMIM, Oct 2009]	533	78.7262	0.166667	Serine/threonine kinase that plays an essential role in regulating inflammatory responses to viral infection, through the activation of the type I IFN, NF-kappa-B and STAT signaling. Also involved in TNFA and inflammatory cytokines, like Interleukin-1, signaling. Following activation of viral RNA sensors, such as RIG-I-like receptors, associates with DDX3X and phosphorylates interferon regulatory…
5592	O15111	CHUK	Kinase	Tchem	Inhibitor of nuclear factor kappa-B kinase subunit alpha	Kinase	0.00151532	This gene encodes a member of the serine/threonine protein kinase family. The encoded protein, a component of a cytokine-activated protein complex that is an inhibitor of the essential transcription factor NF-kappa-B complex, phosphorylates sites that trigger the degradation of the inhibitor via the ubiquination pathway, thereby activating the transcription factor. [provided by RefSeq, Jul 2008]	1368	639.099	0.2	Serine kinase that plays an essential role in the NF-kappa-B signaling pathway which is activated by multiple stimuli such as inflammatory cytokines, bacterial or viral products, DNA damages or other cellular stresses. Acts as part of the canonical IKK complex in the conventional pathway of NF-kappa-B activation and phosphorylates inhibitors of NF-kappa-B on serine residues. These modifications a…	3BRT,5EBZ,5TQW,5TQX,5TQY
5603	P23677	ITPKA	Kinase	Tchem	Inositol-trisphosphate 3-kinase A	Kinase	0.0290135	Regulates inositol phosphate metabolism by phosphorylation of second messenger inositol 1,4,5-trisphosphate to Ins(1,3,4,5)P4. The activity of the inositol 1,4,5-trisphosphate 3-kinase is responsible for regulating the levels of a large number of inositol polyphosphates that are important in cellular signaling. Both calcium/calmodulin and protein phosphorylation mechanisms control its activity. I…	187	42.4543	0.5		1W2C,1W2D,1W2F,4UPU
5605	Q96PC2	IP6K3	Kinase	Tbio	Inositol hexakisphosphate kinase 3	Kinase	0.130729	This gene encodes a protein that belongs to the inositol phosphokinase (IPK) family. This protein is likely responsible for the conversion of inositol hexakisphosphate (InsP6) to diphosphoinositol pentakisphosphate (InsP7/PP-InsP5). It may also convert 1,3,4,5,6-pentakisphosphate (InsP5) to PP-InsP4. Alternative splicing results in multiple transcript variants encoding the same protein.[provided …	129	7.82073	1	Converts inositol hexakisphosphate (InsP6) to diphosphoinositol pentakisphosphate (InsP7/PP-InsP5). Converts 1,3,4,5,6-pentakisphosphate (InsP5) to PP-InsP4.
5644	P52789	HK2	Kinase	Tchem	Hexokinase-2	Kinase	0.00144136	Hexokinases phosphorylate glucose to produce glucose-6-phosphate, the first step in most glucose metabolism pathways. This gene encodes hexokinase 2, the predominant form found in skeletal muscle. It localizes to the outer membrane of mitochondria. Expression of this gene is insulin-responsive, and studies in rat suggest that it is involved in the increased rate of glycolysis seen in rapidly grow…	630	864.646	0.5		2NZT,5HEX,5HFU,5HG1
5713	O14920	IKBKB	Kinase	Tchem	Inhibitor of nuclear factor kappa-B kinase subunit beta	Kinase	0.00090202	The protein encoded by this gene phosphorylates the inhibitor in the inhibitor/NF-kappa-B complex, causing dissociation of the inhibitor and activation of NF-kappa-B. The encoded protein itself is found in a complex of proteins. Several transcript variants, some protein-coding and some not, have been found for this gene. [provided by RefSeq, Sep 2011]	2128	1159.2	0.2	Serine kinase that plays an essential role in the NF-kappa-B signaling pathway which is activated by multiple stimuli such as inflammatory cytokines, bacterial or viral products, DNA damages or other cellular stresses. Acts as part of the canonical IKK complex in the conventional pathway of NF-kappa-B activation and phosphorylates inhibitors of NF-kappa-B on 2 critical serine residues. These modi…	3BRT,3BRV,4E3C,4KIK
5734	Q8NGA4	GPR32P1	GPCR	Tdark	Putative G-protein coupled receptor GPR32P1				0	0		Orphan receptor.
5736	Q14332	FZD2	GPCR	Tchem	Frizzled-2	GPCR	0.00774893	This intronless gene is a member of the frizzled gene family. Members of this family encode seven-transmembrane domain proteins that are receptors for the wingless type MMTV integration site family of signaling proteins. This gene encodes a protein that is coupled to the beta-catenin canonical signaling pathway. Competition between the wingless-type MMTV integration site family, member 3A and win…	331	159.667	0.5	Receptor for Wnt proteins. Most of frizzled receptors are coupled to the beta-catenin canonical signaling pathway, which leads to the activation of disheveled proteins, inhibition of GSK-3 kinase, nuclear accumulation of beta-catenin and activation of Wnt target genes. A second signaling pathway involving PKC and calcium fluxes has been seen for some family members, but it is not yet clear if it …	6C0B
5738	O75084	FZD7	GPCR	Tchem	Frizzled-7	GPCR	0.00916448	Members of the 'frizzled' gene family encode 7-transmembrane domain proteins that are receptors for Wnt signaling proteins. The FZD7 protein contains an N-terminal signal sequence, 10 cysteine residues typical of the cysteine-rich extracellular domain of Fz family members, 7 putative transmembrane domains, and an intracellular C-terminal tail with a PDZ domain-binding motif. FZD7 gene expression …	464	136.091	0.25	Receptor for Wnt proteins. Most of frizzled receptors are coupled to the beta-catenin canonical signaling pathway, which leads to the activation of disheveled proteins, inhibition of GSK-3 kinase, nuclear accumulation of beta-catenin and activation of Wnt target genes. A second signaling pathway involving PKC and calcium fluxes has been seen for some family members, but it is not yet clear if it …	4Z33,5T44,5URV,5WBS
5739	Q9H461	FZD8	GPCR	Tbio	Frizzled-8	GPCR	0.0161355	This intronless gene is a member of the frizzled gene family. Members of this family encode seven-transmembrane domain proteins that are receptors for the Wingless type MMTV integration site family of signaling proteins. Most frizzled receptors are coupled to the beta-catenin canonical signaling pathway. This gene is highly expressed in two human cancer cell lines, indicating that it may play a r…	306	67.5245	1	Receptor for Wnt proteins. Component of the Wnt-Fzd-LRP5-LRP6 complex that triggers beta-catenin signaling through inducing aggregation of receptor-ligand complexes into ribosome-sized signalosomes. The beta-catenin canonical signaling pathway leads to the activation of disheveled proteins, inhibition of GSK-3 kinase, nuclear accumulation of beta-catenin and activation of Wnt target genes. A seco…	5UN5,5UN6
5745	P51570	GALK1	Kinase	Tbio	Galactokinase	Kinase	0.00156677	Galactokinase is a major enzyme for the metabolism of galactose and its deficiency causes congenital cataracts during infancy and presenile cataracts in the adult population. [provided by RefSeq, Jul 2008]	258	729.645	1	Major enzyme for galactose metabolism.	1WUU,1YH7
5755	O15552	FFAR2	GPCR	Tchem	Free fatty acid receptor 2	GPCR	0.00361123	This gene encodes a member of the GP40 family of G protein-coupled receptors that are clustered together on chromosome 19. The encoded protein is a receptor for short chain free fatty acids and may be involved in the inflammatory response and in regulating lipid plasma levels. [provided by RefSeq, Apr 2009]	298	481.568	0.142857	G protein-coupled receptor that is activated by a major product of dietary fiber digestion, the short chain fatty acids (SCFAs), and that plays a role in the regulation of whole-body energy homeostasis and in intestinal immunity. In omnivorous mammals, the short chain fatty acids acetate, propionate and butyrate are produced primarily by the gut microbiome that metabolizes dietary fibers. SCFAs s…
5767	P42685	FRK	Kinase	Tchem	Tyrosine-protein kinase FRK	Kinase	0.00715757	The protein encoded by this gene belongs to the TYR family of protein kinases. This tyrosine kinase is a nuclear protein and may function during G1 and S phase of the cell cycle and suppress growth. [provided by RefSeq, Jul 2008]	517	156.392	2	Non-receptor tyrosine-protein kinase that negatively regulates cell proliferation. Positively regulates PTEN protein stability through phosphorylation of PTEN on 'Tyr-336', which in turn prevents its ubiquitination and degradation, possibly by reducing its binding to NEDD4. May function as a tumor suppressor.
5775	Q5NUL3	FFAR4	GPCR	Tchem	Free fatty acid receptor 4	GPCR	0.00439747	This gene encodes a G protein-coupled receptor (GPR) which belongs to the rhodopsin family of GPRs. The encoded protein functions as a receptor for free fatty acids, including omega-3, and participates in suppressing anti-inflammatory responses and insulin sensitizing. Multiple transcript variants encoding different isoforms have been found for this gene. [provided by RefSeq, Feb 2012]	329	309.495	0.142857	Receptor for medium and long-chain free fatty acids (FFAs). Signals via a G(q)/G(11)-coupled pathway. Acts as a receptor for omega-3 fatty acids and mediates robust anti-inflammatory effects, particularly in macrophages and fat cells. The anti-inflammatory effects involve inhibition of TAK1 through a beta-arrestin 2 (ARRB2)/TAB1-dependent effect, but independent of the G(q)/G(11)-coupled pathway.…
5801	O00144	FZD9	GPCR	Tbio	Frizzled-9	GPCR	0.0141455	Members of the 'frizzled' gene family encode 7-transmembrane domain proteins that are receptors for Wnt signaling proteins. The FZD9 gene is located within the Williams syndrome common deletion region of chromosome 7, and heterozygous deletion of the FZD9 gene may contribute to the Williams syndrome phenotype. FZD9 is expressed predominantly in brain, testis, eye, skeletal muscle, and kidney. [pr…	500	79.5701	0.5	Receptor for WNT2 that is coupled to the beta-catenin canonical signaling pathway, which leads to the activation of disheveled proteins, inhibition of GSK-3 kinase, nuclear accumulation of beta-catenin and activation of Wnt target genes (By similarity). Plays a role in neuromuscular junction (NMJ) assembly by negatively regulating the clustering of acetylcholine receptors (AChR) through the beta-…
5807	P47211	GALR1	GPCR	Tchem	Galanin receptor type 1	GPCR	0.00733469	The neuropeptide galanin elicits a range of biological effects by interaction with specific G-protein-coupled receptors. Galanin receptors are seven-transmembrane proteins shown to activate a variety of intracellular second-messenger pathways. GALR1 inhibits adenylyl cyclase via a G protein of the Gi/Go family. GALR1 is widely expressed in the brain and spinal cord, as well as in peripheral sites…	329	141.681	2	Receptor for the hormone galanin. The activity of this receptor is mediated by G proteins that inhibit adenylate cyclase activity.
5827	Q9NPG1	FZD3	GPCR	Tbio	Frizzled-3	GPCR	0.00964507	This gene is a member of the frizzled gene family. Members of this family encode seven-transmembrane domain proteins that are receptors for the wingless type MMTV integration site family of signaling proteins. Most frizzled receptors are coupled to the beta-catenin canonical signaling pathway. The function of this protein is unknown, although it may play a role in mammalian hair follicle developm…	420	120.734	0.1	Receptor for Wnt proteins. Most of frizzled receptors are coupled to the beta-catenin canonical signaling pathway, which leads to the activation of disheveled proteins, inhibition of GSK-3 kinase, nuclear accumulation of beta-catenin and activation of Wnt target genes. A second signaling pathway involving PKC and calcium fluxes has been seen for some family members, but it is not yet clear if it …
5828	Q9ULV1	FZD4	GPCR	Tbio	Frizzled-4	GPCR	0.00577957	This gene is a member of the frizzled gene family. Members of this family encode seven-transmembrane domain proteins that are receptors for the Wingless type MMTV integration site family of signaling proteins. Most frizzled receptors are coupled to the beta-catenin canonical signaling pathway. This protein may play a role as a positive regulator of the Wingless type MMTV integration site signalin…	465	207.024	0.125	Receptor for Wnt proteins. Most of frizzled receptors are coupled to the beta-catenin (CTNNB1) canonical signaling pathway, which leads to the activation of disheveled proteins, inhibition of GSK-3 kinase, nuclear accumulation of beta-catenin (CTNNB1) and activation of Wnt target genes. Plays a critical role in retinal vascularization by acting as a receptor for Wnt proteins and norrin (NDP). In …	5BPB,5BPQ,5BQC,5BQE,5CL1,5CM4,5UWG
5845	P06241	FYN	Kinase	Tclin	Tyrosine-protein kinase Fyn	Kinase	0.00072167	This gene is a member of the protein-tyrosine kinase oncogene family. It encodes a membrane-associated tyrosine kinase that has been implicated in the control of cell growth. The protein associates with the p85 subunit of phosphatidylinositol 3-kinase and interacts with the fyn-binding protein. Alternatively spliced transcript variants encoding distinct isoforms exist. [provided by RefSeq, Jul 20…	933	1383.47	0.142857	Non-receptor tyrosine-protein kinase that plays a role in many biological processes including regulation of cell growth and survival, cell adhesion, integrin-mediated signaling, cytoskeletal remodeling, cell motility, immune response and axon guidance. Inactive FYN is phosphorylated on its C-terminal tail within the catalytic domain. Following activation by PKA, the protein subsequently associate…	1A0N,1AOT,1AOU,1AVZ,1AZG,1EFN,1FYN,1G83,1M27,1NYF,1NYG,1SHF,1ZBJ,2DQ7,2MQI,2MRJ,2MRK,3H0F,3H0H,3H0I,3UA6,3UA7,4D8D,4EIK,4U17,4U1P,4ZNX
5873	P21462	FPR1	GPCR	Tchem	fMet-Leu-Phe receptor	GPCR	0.00256884	This gene encodes a G protein-coupled receptor of mammalian phagocytic cells that is a member of the G-protein coupled receptor 1 family. The protein mediates the response of phagocytic cells to invasion of the host by microorganisms and is important in host defense and inflammation.[provided by RefSeq, Jul 2010]	401	478.361	0.5	High affinity receptor for N-formyl-methionyl peptides (fMLP), which are powerful neutrophil chemotactic factors (PubMed:2161213, PubMed:2176894, PubMed:10514456, PubMed:15153520). Binding of fMLP to the receptor stimulates intracellular calcium mobilization and superoxide anion release (PubMed:2161213, PubMed:1712023, PubMed:15153520). This response is mediated via a G-protein that activates a p…
5879	Q9UP38	FZD1	GPCR	Tchem	Frizzled-1	GPCR	0.010972	Members of the 'frizzled' gene family encode 7-transmembrane domain proteins that are receptors for Wnt signaling proteins. The FZD1 protein contains a signal peptide, a cysteine-rich domain in the N-terminal extracellular region, 7 transmembrane domains, and a C-terminal PDZ domain-binding motif. The FZD1 transcript is expressed in various tissues. [provided by RefSeq, Jul 2008]	405	76.9653	0.5	Receptor for Wnt proteins (PubMed:10557084). Activated by WNT3A, WNT3, WNT1 and to a lesser extent WNT2, but apparently not by WNT4, WNT5A, WNT5B, WNT6, WNT7A or WNT7B (PubMed:10557084). Contradictory results showing activation by WNT7B have been described for mouse (By similarity). Functions in the canonical Wnt/beta-catenin signaling pathway (PubMed:10557084). The canonical Wnt/beta-catenin sig…
5880	Q14802	FXYD3	Ion Channel	Tbio	FXYD domain-containing ion transport regulator 3		0.0121783	This gene belongs to a small family of FXYD-domain containing regulators of Na+/K+ ATPases which share a 35-amino acid signature sequence domain, beginning with the sequence PFXYD, and containing 7 invariant and 6 highly conserved amino acids. This gene encodes a cell membrane protein that may regulate the function of ion-pumps and ion-channels. This gene may also play a role in tumor progression…	131	57.9151	0.333333	Associates with and regulates the activity of the sodium/potassium-transporting ATPase (NKA) which transports Na(+) out of the cell and K(+) into the cell (PubMed:17077088). Reduces glutathionylation of the NKA beta-1 subunit ATP1B1, thus reversing glutathionylation-mediated inhibition of ATP1B1 (PubMed:21454534). Induces a hyperpolarization-activated chloride current when expressed in Xenopus oo…
5881	Q96N19	GPR137	GPCR	Tbio	Integral membrane protein GPR137	other 7TM	0.0878349		166	14.2843	0.166667
5887	Q9UF33	EPHA6	Kinase	Tchem	Ephrin type-A receptor 6	Kinase	0.0271397		338	55.4704	0.090909	Receptor tyrosine kinase which binds promiscuously GPI-anchored ephrin-A family ligands residing on adjacent cells, leading to contact-dependent bidirectional signaling into neighboring cells. The signaling pathway downstream of the receptor is referred to as forward signaling while the signaling pathway downstream of the ephrin ligand is referred to as reverse signaling (By similarity).
5889	Q15375	EPHA7	Kinase	Tchem	Ephrin type-A receptor 7	Kinase	0.0106556	This gene belongs to the ephrin receptor subfamily of the protein-tyrosine kinase family. EPH and EPH-related receptors have been implicated in mediating developmental events, particularly in the nervous system. Receptors in the EPH subfamily typically have a single kinase domain and an extracellular region containing a Cys-rich domain and 2 fibronectin type III repeats. The ephrin receptors are …	488	111.484	0.090909	Receptor tyrosine kinase which binds promiscuously GPI-anchored ephrin-A family ligands residing on adjacent cells, leading to contact-dependent bidirectional signaling into neighboring cells. The signaling pathway downstream of the receptor is referred to as forward signaling while the signaling pathway downstream of the ephrin ligand is referred to as reverse signaling. Among GPI-anchored ephri…	2REI,3DKO,3H8M,3NRU
5891	P29323	EPHB2	Kinase	Tchem	Ephrin type-B receptor 2	Kinase	0.00211785	This gene encodes a member of the Eph receptor family of receptor tyrosine kinase transmembrane glycoproteins. These receptors are composed of an N-terminal glycosylated ligand-binding domain, a transmembrane region and an intracellular kinase domain. They bind ligands called ephrins and are involved in diverse cellular processes including motility, division, and differentiation. A distinguishing…	611	649.801	0.333333	Receptor tyrosine kinase which binds promiscuously transmembrane ephrin-B family ligands residing on adjacent cells, leading to contact-dependent bidirectional signaling into neighboring cells. The signaling pathway downstream of the receptor is referred to as forward signaling while the signaling pathway downstream of the ephrin ligand is referred to as reverse signaling. Functions in axon guida…	1B4F,1F0M,2QBX,3ZFM
5918	O14842	FFAR1	GPCR	Tchem	Free fatty acid receptor 1	GPCR	0.00271782	This gene encodes a member of the GP40 family of G protein-coupled receptors that are clustered together on chromosome 19. The encoded protein is a receptor for medium and long chain free fatty acids and may be involved in the metabolic regulation of insulin secretion. Polymorphisms in this gene may be associated with type 2 diabetes. [provided by RefSeq, Apr 2009]	306	477.477	0.25	G-protein coupled receptor for medium and long chain saturated and unsaturated fatty acids that plays an important role in glucose homeostasis. Fatty acid binding increases glucose-stimulated insulin secretion, and may also enhance the secretion of glucagon-like peptide 1 (GLP-1). May also play a role in bone homeostasis; receptor signaling activates pathways that inhibit osteoclast differentiati…	4PHU,5TZR,5TZY
5943	P48050	KCNJ4	Ion Channel	Tchem	Inward rectifier potassium channel 4	IC	0.0093539	Several different potassium channels are known to be involved with electrical signaling in the nervous system. One class is activated by depolarization whereas a second class is not. The latter are referred to as inwardly rectifying K+ channels, and they have a greater tendency to allow potassium to flow into the cell rather than out of it. This asymmetry in potassium ion conductance plays a key …	277	114.448	0.25	Inward rectifier potassium channels are characterized by a greater tendency to allow potassium to flow into the cell rather than out of it. Their voltage dependence is regulated by the concentration of extracellular potassium; as external potassium is raised, the voltage range of the channel opening shifts to more positive voltages. The inward rectification is mainly due to the blockage of outwar…	3GJ9
5944	O00180	KCNK1	Ion Channel	Tbio	Potassium channel subfamily K member 1	IC	0.0112459	This gene encodes one of the members of the superfamily of potassium channel proteins containing two pore-forming P domains. The product of this gene has not been shown to be a functional channel, however, it may require other non-pore-forming proteins for activity. [provided by RefSeq, Jul 2008]	277	124.892	1	Ion channel that contributes to passive transmembrane potassium transport and to the regulation of the resting membrane potential in brain astrocytes, but also in kidney and in other tissues (PubMed:15820677, PubMed:21653227). Forms dimeric channels through which potassium ions pass in accordance with their electrochemical gradient. The channel is selective for K(+) ions at physiological potassiu…	3UKM
5945	Q96T54	KCNK17	Ion Channel	Tchem	Potassium channel subfamily K member 17	IC	0.0403883	The protein encoded by this gene belongs to the family of potassium channel proteins containing two pore-forming P domains. This channel is an open rectifier which primarily passes outward current under physiological K+ concentrations. This gene is activated at alkaline pH. Alternatively spliced transcript variants encoding different isoforms have been found for this gene. [provided by RefSeq, Se…	54	39.032	1	Outward rectifying potassium channel. Produces rapidly activating and non-inactivating outward rectifier K(+) currents.
5954	Q8TF76	HASPIN	Kinase	Tchem	Serine/threonine-protein kinase haspin	Kinase	0.015742		138	82.8645	1	Serine/threonine-protein kinase that phosphorylates histone H3 at 'Thr-3' (H3T3ph) during mitosis. May act through H3T3ph to both position and modulate activation of AURKB and other components of the chromosomal passenger complex (CPC) at centromeres to ensure proper chromatid cohesion, metaphase alignment and normal progression through the cell cycle.	2VUW,2WB8,3DLZ,3E7V,3F2N,3FMD,3IQ7,4OUC,4QTC,5HTB,5HTC,6G34,6G35,6G36,6G37,6G38,6G39,6G3A
5996	P63252	KCNJ2	Ion Channel	Tchem	Inward rectifier potassium channel 2	IC	0.00290395	Potassium channels are present in most mammalian cells, where they participate in a wide range of physiologic responses. The protein encoded by this gene is an integral membrane protein and inward-rectifier type potassium channel. The encoded protein, which has a greater tendency to allow potassium to flow into a cell rather than out of a cell, probably participates in establishing action potenti…	285	354.628	0.5	Probably participates in establishing action potential waveform and excitability of neuronal and muscle tissues. Inward rectifier potassium channels are characterized by a greater tendency to allow potassium to flow into the cell rather than out of it. Their voltage dependence is regulated by the concentration of extracellular potassium; as external potassium is raised, the voltage range of the c…
5997	P48051	KCNJ6	Ion Channel	Tchem	G protein-activated inward rectifier potassium channel 2	IC	0.00330353	This gene encodes a member of the G protein-coupled inwardly-rectifying potassium channel family of inward rectifier potassium channels. This type of potassium channel allows a greater flow of potassium into the cell than out of it. These proteins modulate many physiological processes, including heart rate in cardiac cells and circuit activity in neuronal cells, through G-protein coupled receptor…	262	356.805	0.166667	This potassium channel may be involved in the regulation of insulin secretion by glucose and/or neurotransmitters acting through G-protein-coupled receptors. Inward rectifier potassium channels are characterized by a greater tendency to allow potassium to flow into the cell rather than out of it. Their voltage dependence is regulated by the concentration of extracellular potassium; as external po…
5998	P25092	GUCY2C	Kinase	Tclin	Heat-stable enterotoxin receptor	Kinase	0.00209733	This gene encodes a transmembrane protein that functions as a receptor for endogenous peptides guanylin and uroguanylin, and the heat-stable E. coli enterotoxin. The encoded protein activates the cystic fibrosis transmembrane conductance regulator. Mutations in this gene are associated with familial diarrhea (autosomal dominant) and meconium ileus (autosomal recessive). [provided by RefSeq, Nov 2…	250	669.366	0.5	Receptor for the E.coli heat-stable enterotoxin (E.coli enterotoxin markedly stimulates the accumulation of cGMP in mammalian cells expressing GC-C). Also activated by the endogenous peptides guanylin and uroguanylin.
5999	P17540	CKMT2	Kinase	Tbio	Creatine kinase S-type, mitochondrial	Kinase	0.00904745	Mitochondrial creatine kinase (MtCK) is responsible for the transfer of high energy phosphate from mitochondria to the cytosolic carrier, creatine. It belongs to the creatine kinase isoenzyme family. It exists as two isoenzymes, sarcomeric MtCK and ubiquitous MtCK, encoded by separate genes. Mitochondrial creatine kinase occurs in two different oligomeric forms: dimers and octamers, in contrast t…	376	106.873	1	Reversibly catalyzes the transfer of phosphate between ATP and various phosphogens (e.g. creatine phosphate). Creatine kinase isoenzymes play a central role in energy transduction in tissues with large, fluctuating energy demands, such as skeletal muscle, heart, brain and spermatozoa.	4Z9M
6012	Q9H2X6	HIPK2	Kinase	Tchem	Homeodomain-interacting protein kinase 2	Kinase	0.00688737	This gene encodes a conserved serine/threonine kinase that is a member of the homeodomain-interacting protein kinase family. The encoded protein interacts with homeodomain transcription factors and many other transcription factors such as p53, and can function as both a corepressor and a coactivator depending on the transcription factor and its subcellular localization. Multiple transcript varian…	331	203.591	0.2	Serine/threonine-protein kinase involved in transcription regulation, p53/TP53-mediated cellular apoptosis and regulation of the cell cycle. Acts as a corepressor of several transcription factors, including SMAD1 and POU4F1/Brn3a and probably NK homeodomain transcription factors. Phosphorylates PDX1, ATF1, PML, p53/TP53, CREB1, CTBP1, CBX4, RUNX1, EP300, CTNNB1, HMGA1 and ZBTB4. Inhibits cell gro…
6022	Q9Y5N1	HRH3	GPCR	Tclin	Histamine H3 receptor	GPCR	0.00148904	Histamine is a ubiquitous messenger molecule released from mast cells, enterochromaffin-like cells, and neurons. Its various actions are mediated by histamine receptors H1, H2, H3 and H4. This gene encodes one of the histamine receptors (H3) which belongs to the family 1 of G protein-coupled receptors. It is an integral membrane protein and can regulate neurotransmitter release. This receptor can…	434	699.923	1	The H3 subclass of histamine receptors could mediate the histamine signals in CNS and peripheral nervous system. Signals through the inhibition of adenylate cyclase and displays high constitutive activity (spontaneous activity in the absence of agonist). Agonist stimulation of isoform 3 neither modified adenylate cyclase activity nor induced intracellular calcium mobilization.
6036	Q2TB90	HKDC1	Kinase	Tbio	Putative hexokinase HKDC1	Kinase	0.016969	This gene encodes a member of the hexokinase protein family. The encoded protein is involved in glucose metabolism, and reduced expression may be associated with gestational diabetes mellitus. High expression of this gene may also be associated with poor prognosis in hepatocarcinoma. [provided by RefSeq, Sep 2016]	130	66.9228	1
6050	Q8NE63	HIPK4	Kinase	Tchem	Homeodomain-interacting protein kinase 4		0.282723	This gene encodes a member of the homeodomain interacting protein kinase (HIPK) family of proteins. While other members of this family are found throughout vertebrates, this member is present only in mammals. Compared to other members of this family, the encoded protein lacks a nuclear localization signal and a C-terminal autoinhibitory domain. The encoded protein exhibits kinase activity and may…	268	5.49689	0.333333	Protein kinase that phosphorylates human TP53 at Ser-9, and thus induces TP53 repression of BIRC5 promoter (By similarity). May act as a corepressor of transcription factors (Potential).
6097	P25021	HRH2	GPCR	Tclin	Histamine H2 receptor	GPCR	0.00053091	Histamine is a ubiquitous messenger molecule released from mast cells, enterochromaffin-like cells, and neurons. Its various actions are mediated by histamine receptors H1, H2, H3 and H4. Histamine receptor H2 belongs to the family 1 of G protein-coupled receptors. It is an integral membrane protein and stimulates gastric acid secretion. It also regulates gastrointestinal motility and intestinal …	319	1906.66	0.5	The H2 subclass of histamine receptors mediates gastric acid secretion. Also appears to regulate gastrointestinal motility and intestinal secretion. Possible role in regulating cell growth and differentiation. The activity of this receptor is mediated by G proteins which activate adenylyl cyclase and, through a separate G protein-dependent mechanism, the phosphoinositide/protein kinase (PKC) sign…
6115	P04183	TK1	Kinase	Tchem	Thymidine kinase, cytosolic	Kinase	0.00139343	The protein encoded by this gene is a cytosolic enzyme that catalyzes the addition of a gamma-phosphate group to thymidine. This creates dTMP and is the first step in the biosynthesis of dTTP, which is one component required for DNA replication. The encoded protein, whose levels fluctuate depending on the cell cycle stage, can act as a low activity dimer or a high activity tetramer. High levels o…	397	895.935	0.25		1W4R,1XBT,2ORV,2WVJ
6116	Q8TDS4	HCAR2	GPCR	Tclin	Hydroxycarboxylic acid receptor 2	GPCR	0.0054199		188	267.118	0.111111	Acts as a high affinity receptor for both nicotinic acid (also known as niacin) and (D)-beta-hydroxybutyrate and mediates increased adiponectin secretion and decreased lipolysis through G(i)-protein-mediated inhibition of adenylyl cyclase. This pharmacological effect requires nicotinic acid doses that are much higher than those provided by a normal diet. Mediates nicotinic acid-induced apoptosis …
6117	Q9P1Z3	HCN3	Ion Channel	Tclin	Potassium/sodium hyperpolarization-activated cyclic nucleotide-gated channel 3	IC	0.0165866	This gene encodes a multi-pass membrane protein that functions as a voltage gated cation channel. The encoded protein is a member of a family of closely related cyclic adenosine monophosphate-binding channel proteins. Alternative splicing results in multiple transcript variants. [provided by RefSeq, Aug 2012]	274	69.1493	1	Hyperpolarization-activated potassium channel. May also facilitate the permeation of sodium ions.
6144	Q96RR4	CAMKK2	Kinase	Tchem	Calcium/calmodulin-dependent protein kinase kinase 2		0.00426898	The product of this gene belongs to the Serine/Threonine protein kinase family, and to the Ca(2+)/calmodulin-dependent protein kinase subfamily. The major isoform of this gene plays a role in the calcium/calmodulin-dependent (CaM) kinase cascade by phosphorylating the downstream kinases CaMK1 and CaMK4. Protein products of this gene also phosphorylate AMP-activated protein kinase (AMPK). This gen…	369	263.486	0.5	Calcium/calmodulin-dependent protein kinase belonging to a proposed calcium-triggered signaling cascade involved in a number of cellular processes. Isoform 1, isoform 2 and isoform 3 phosphorylate CAMK1 and CAMK4. Isoform 3 phosphorylates CAMK1D. Isoform 4, isoform 5 and isoform 6 lacking part of the calmodulin-binding domain are inactive. Efficiently phosphorylates 5'-AMP-activated protein kinas…	2ZV2,5UY6,5UYJ,5VT1,6BKU,6BLE,6BQL,6BQP,6BQQ,6BRC,6CMJ,6EWW,6FEL
6230	Q969F8	KISS1R	GPCR	Tchem	KiSS-1 receptor	GPCR	0.0026282	The protein encoded by this gene is a galanin-like G protein-coupled receptor that binds metastin, a peptide encoded by the metastasis suppressor gene KISS1. The tissue distribution of the expressed gene suggests that it is involved in the regulation of endocrine function, and this is supported by the finding that this gene appears to play a role in the onset of puberty. Mutations in this gene ha…	315	402.741	0.2	Receptor for metastin (kisspeptin-54 or kp-54), a C-terminally amidated peptide of KiSS1. KiSS1 is a metastasis suppressor protein that suppresses metastases in malignant melanomas and in some breast carcinomas without affecting tumorigenicity. The metastasis suppressor properties may be mediated in part by cell cycle arrest and induction of apoptosis in malignant cells. The receptor is essential…
6281	P23416	GLRA2	Ion Channel	Tchem	Glycine receptor subunit alpha-2	IC	0.028393	The glycine receptor consists of two subunits, alpha and beta, and acts as a pentamer. The protein encoded by this gene is an alpha subunit and can bind strychnine. Several transcript variants encoding different isoforms have been found for this gene.[provided by RefSeq, Jan 2010]	45	63.8335	1	Glycine receptors are ligand-gated chloride channels. Channel opening is triggered by extracellular glycine (PubMed:2155780, PubMed:15302677, PubMed:16144831, PubMed:23895467, PubMed:25445488). Channel opening is also triggered by taurine and beta-alanine (PubMed:15302677). Plays a role in the down-regulation of neuronal excitability. Contributes to the generation of inhibitory postsynaptic curre…
6291	P16591	FER	Kinase	Tclin	Tyrosine-protein kinase Fer	Kinase	0.0153118	The protein encoded by this gene is a member of the FPS/FES family of non-transmembrane receptor tyrosine kinases. It regulates cell-cell adhesion and mediates signaling from the cell surface to the cytoskeleton via growth factor receptors. Alternative splicing results in multiple transcript variants. A related pseudogene has been identified on chromosome X. [provided by RefSeq, Apr 2015]	529	50.5558	1	Tyrosine-protein kinase that acts downstream of cell surface receptors for growth factors and plays a role in the regulation of the actin cytoskeleton, microtubule assembly, lamellipodia formation, cell adhesion, cell migration and chemotaxis. Acts downstream of EGFR, KIT, PDGFRA and PDGFRB. Acts downstream of EGFR to promote activation of NF-kappa-B and cell proliferation. May play a role in the…	2KK6
6304	P36888	FLT3	Kinase	Tclin	Receptor-type tyrosine-protein kinase FLT3	Kinase	0.0003477	This gene encodes a class III receptor tyrosine kinase that regulates hematopoiesis. This receptor is activated by binding of the fms-related tyrosine kinase 3 ligand to the extracellular domain, which induces homodimer formation in the plasma membrane leading to autophosphorylation of the receptor. The activated receptor kinase subsequently phosphorylates and activates multiple cytoplasmic effec…	1452	3617.75	0.333333	Tyrosine-protein kinase that acts as cell-surface receptor for the cytokine FLT3LG and regulates differentiation, proliferation and survival of hematopoietic progenitor cells and of dendritic cells. Promotes phosphorylation of SHC1 and AKT1, and activation of the downstream effector MTOR. Promotes activation of RAS signaling and phosphorylation of downstream kinases, including MAPK1/ERK2 and/or M…	1RJB,3QS7,3QS9,4RT7,4XUF,5X02
6311	P23945	FSHR	GPCR	Tclin	Follicle-stimulating hormone receptor	GPCR	0.00123929	The protein encoded by this gene belongs to family 1 of G-protein coupled receptors. It is the receptor for follicle stimulating hormone and functions in gonad development. Mutations in this gene cause ovarian dysgenesis type 1, and also ovarian hyperstimulation syndrome. Alternative splicing results in multiple transcript variants. [provided by RefSeq, Mar 2010]	623	939.57	0.5	G protein-coupled receptor for follitropin, the follicle-stimulating hormone (PubMed:11847099, PubMed:24058690, PubMed:24692546). Through cAMP production activates the downstream PI3K-AKT and ERK1/ERK2 signaling pathways (PubMed:24058690).	1XUN,1XWD,4AY9,4MQW
6319	Q96DB9	FXYD5	Ion Channel	Tbio	FXYD domain-containing ion transport regulator 5	IC	0.0159836	This gene encodes a member of a family of small membrane proteins that share a 35-amino acid signature sequence domain, beginning with the sequence PFXYD and containing 7 invariant and 6 highly conserved amino acids. The approved human gene nomenclature for the family is FXYD-domain containing ion transport regulator. Mouse FXYD5 has been termed RIC (Related to Ion Channel). FXYD2, also known as …	198	91.1112	1	Involved in down-regulation of E-cadherin which results in reduced cell adhesion. Promotes metastasis.
6320	Q13467	FZD5	GPCR	Tbio	Frizzled-5	GPCR	0.0167383	Members of the 'frizzled' gene family encode 7-transmembrane domain proteins that are receptors for Wnt signaling proteins. The FZD5 protein is believed to be the receptor for the Wnt5A ligand. [provided by RefSeq, Jul 2008]	398	69.3985	0.1	Receptor for Wnt proteins (PubMed:9054360, PubMed:10097073, PubMed:20530549). Can activate WNT2, WNT10B, WNT5A, but not WNT2B or WNT4 (in vitro); the in vivo situation may be different since not all of these are known to be coexpressed (By similarity). In neurons, activation of WNT7A promotes formation of synapses (PubMed:20530549). Functions in the canonical Wnt/beta-catenin signaling pathway. T…	5URY,5URZ
6346	Q92847	GHSR	GPCR	Tclin	Growth hormone secretagogue receptor type 1	GPCR	0.00165638	This gene encodes a member of the G-protein coupled receptor family. The encoded protein may play a role in energy homeostasis and regulation of body weight. Two identified transcript variants are expressed in several tissues and are evolutionary conserved in fish and swine. One transcript, 1a, excises an intron and encodes the functional protein; this protein is the receptor for the Ghrelin liga…	271	436.368	0.142857	Receptor for ghrelin, coupled to G-alpha-11 proteins. Stimulates growth hormone secretion. Binds also other growth hormone releasing peptides (GHRP) (e.g. Met-enkephalin and GHRP-6) as well as non-peptide, low molecular weight secretagogues (e.g. L-692,429, MK-0677, adenosine).
6352	O14976	GAK	Kinase	Tchem	Cyclin-G-associated kinase	Kinase	0.00731928	In all eukaryotes, the cell cycle is governed by cyclin-dependent protein kinases (CDKs), whose activities are regulated by cyclins and CDK inhibitors in a diverse array of mechanisms that involve the control of phosphorylation and dephosphorylation of Ser, Thr or Tyr residues. Cyclins are molecules that possess a consensus domain called the 'cyclin box.' In mammalian cells, 9 cyclin species have…	293	175.238	0.25	Associates with cyclin G and CDK5. Seems to act as an auxilin homolog that is involved in the uncoating of clathrin-coated vesicles by Hsc70 in non-neuronal cells. Expression oscillates slightly during the cell cycle, peaking at G1.	4C57,4C58,4C59,4O38,4Y8D,5Y7Z,5Y80
6354	P32239	CCKBR	GPCR	Tclin	Gastrin/cholecystokinin type B receptor	GPCR	0.00158159	This gene encodes a G-protein coupled receptor for gastrin and cholecystokinin (CCK), regulatory peptides of the brain and gastrointestinal tract. This protein is a type B gastrin receptor, which has a high affinity for both sulfated and nonsulfated CCK analogs and is found principally in the central nervous system and the gastrointestinal tract. Alternative splicing results in multiple transcrip…	325	616.567	0.333333	Receptor for gastrin and cholecystokinin. The CCK-B receptors occur throughout the central nervous system where they modulate anxiety, analgesia, arousal, and neuroleptic activity. This receptor mediates its action by association with G proteins that activate a phosphatidylinositol-calcium second messenger system.	1L4T
6360	O60883	GPR37L1	GPCR	Tbio	G-protein coupled receptor 37-like 1	group A	0.0846709		272	21.0346	1	G-protein coupled receptor (PubMed:27072655). Has been shown to bind the neuroprotective and glioprotective factor prosaposin (PSAP), leading to endocytosis followed by an ERK phosphorylation cascade (PubMed:23690594). However, other studies have shown that prosaposin does not increase activity (PubMed:27072655, PubMed:28688853). It has been suggested that GPR37L1 is a constitutively active recep…
6403	O60353	FZD6	GPCR	Tbio	Frizzled-6	GPCR	0.0142514	This gene represents a member of the 'frizzled' gene family, which encode 7-transmembrane domain proteins that are receptors for Wnt signaling proteins. The protein encoded by this family member contains a signal peptide, a cysteine-rich domain in the N-terminal extracellular region, and seven transmembrane domains, but unlike other family members, this protein does not contain a C-terminal PDZ d…	317	95.0197	0.125	Receptor for Wnt proteins. Most of frizzled receptors are coupled to the beta-catenin canonical signaling pathway, which leads to the activation of disheveled proteins, inhibition of GSK-3 kinase, nuclear accumulation of beta-catenin and activation of Wnt target genes. A second signaling pathway involving PKC and calcium fluxes has been seen for some family members, but it is not yet clear if it …
6418	Q9Y2I7	PIKFYVE	Kinase	Tchem	1-phosphatidylinositol 3-phosphate 5-kinase	Kinase	0.00441336	Phosphorylated derivatives of phosphatidylinositol (PtdIns) regulate cytoskeletal functions, membrane trafficking, and receptor signaling by recruiting protein complexes to cell- and endosomal-membranes. Humans have multiple PtdIns proteins that differ by the degree and position of phosphorylation of the inositol ring. This gene encodes an enzyme (PIKfyve; also known as phosphatidylinositol-3-pho…	304	301.984	1	The PI(3,5)P2 regulatory complex regulates both the synthesis and turnover of phosphatidylinositol 3,5-bisphosphate (PtdIns(3,5)P2). Catalyzes the phosphorylation of phosphatidylinositol 3-phosphate on the fifth hydroxyl of the myo-inositol ring, to form phosphatidylinositol 3,5-bisphosphate. Required for endocytic-vacuolar pathway and nuclear migration. Plays a role in the biogenesis of endosome…
6426	P25090	FPR2	GPCR	Tchem	N-formyl peptide receptor 2	GPCR	0.00228744		373	561.018	0.333333	Low affinity receptor for N-formyl-methionyl peptides, which are powerful neutrophil chemotactic factors (PubMed:1374236). Binding of FMLP to the receptor causes activation of neutrophils (PubMed:1374236). This response is mediated via a G-protein that activates a phosphatidylinositol-calcium second messenger system (PubMed:1374236). The activation of LXA4R could result in an anti-inflammatory ou…
6441	P58549	FXYD7	Ion Channel	Tbio	FXYD domain-containing ion transport regulator 7		0.0882033	This reference sequence was derived from multiple replicate ESTs and validated by similar human genomic sequence. This gene encodes a member of a family of small membrane proteins that share a 35-amino acid signature sequence domain, beginning with the sequence PFXYD and containing 7 invariant and 6 highly conserved amino acids. The approved human gene nomenclature for the family is FXYD-domain c…	171	10.8485	1.36667
6463	P11362	FGFR1	Kinase	Tclin	Fibroblast growth factor receptor 1	Kinase	0.00055714	The protein encoded by this gene is a member of the fibroblast growth factor receptor (FGFR) family, where amino acid sequence is highly conserved between members and throughout evolution. FGFR family members differ from one another in their ligand affinities and tissue distribution. A full-length representative protein consists of an extracellular region, composed of three immunoglobulin-like do…	2216	1978.29	0.5	Tyrosine-protein kinase that acts as cell-surface receptor for fibroblast growth factors and plays an essential role in the regulation of embryonic development, cell proliferation, differentiation and migration. Required for normal mesoderm patterning and correct axial organization during embryonic development, normal skeletogenesis and normal development of the gonadotropin-releasing hormone (Gn…	1AGW,1CVS,1EVT,1FGI,1FGK,1FQ9,1XR0,2CR3,2FGI,3C4F,3DPK,3GQI,3GQL,3JS2,3KRJ,3KRL,3KXX,3KY2,3OJV,3RHX,3TT0,4F63,4F64,4F65,4NK9,4NKA,4NKS,4RWI,4RWJ,4RWK,4RWL,4UWB,4UWC,4UWY,4V01,4V04,4V05,4WUN,4ZSA,5A46,5A4C,5AM6,5AM7,5B7V,5EW8,5FLF,5O49,5O4A,5UQ0,5UR1,5VND,5W21,5W59,5ZV2
6489	P21802	FGFR2	Kinase	Tclin	Fibroblast growth factor receptor 2	Kinase	0.00066613	The protein encoded by this gene is a member of the fibroblast growth factor receptor family, where amino acid sequence is highly conserved between members and throughout evolution. FGFR family members differ from one another in their ligand affinities and tissue distribution. A full-length representative protein consists of an extracellular region, composed of three immunoglobulin-like domains, …	1176	1911.49	1	Tyrosine-protein kinase that acts as cell-surface receptor for fibroblast growth factors and plays an essential role in the regulation of cell proliferation, differentiation, migration and apoptosis, and in the regulation of embryonic development. Required for normal embryonic patterning, trophoblast function, limb bud development, lung morphogenesis, osteogenesis and skin development. Plays an e…	1DJS,1E0O,1EV2,1GJO,1II4,1IIL,1NUN,1OEC,1WVZ,2FDB,2PSQ,2PVF,2PVY,2PWL,2PY3,2PZ5,2PZP,2PZR,2Q0B,3B2T,3CAF,3CLY,3CU1,3DAR,3EUU,3OJ2,3OJM,3RI1,4J23,4J95,4J96,4J97,4J98,4J99,4WV1,5EG3,5UGL,5UGX,5UHN,5UI0
6492	P22455	FGFR4	Kinase	Tclin	Fibroblast growth factor receptor 4	Kinase	0.00258329	The protein encoded by this gene is a tyrosine kinase and cell surface receptor for fibroblast growth factors. The encoded protein is involved in the regulation of several pathways, including cell proliferation, cell differentiation, cell migration, lipid metabolism, bile acid biosynthesis, vitamin D metabolism, glucose uptake, and phosphate homeostasis. This protein consists of an extracellular …	736	495.051	0.2	Tyrosine-protein kinase that acts as cell-surface receptor for fibroblast growth factors and plays a role in the regulation of cell proliferation, differentiation and migration, and in regulation of lipid metabolism, bile acid biosynthesis, glucose uptake, vitamin D metabolism and phosphate homeostasis. Required for normal down-regulation of the expression of CYP7A1, the rate-limiting enzyme in b…	1QCT,4QQ5,4QQC,4QQJ,4QQT,4QRC,4R6V,4TYE,4TYG,4TYI,4TYJ,4UXQ,4XCU,5JKG,5NUD,5NWZ,5XFF,5XFJ
6500	Q9H479	FN3K	Kinase	Tbio	Fructosamine-3-kinase	Kinase	0.0260075	A high concentration of glucose can result in non-enzymatic oxidation of proteins by reaction of glucose and lysine residues (glycation). Proteins modified in this way, fructosamines, are less active or functional. This gene encodes an enzyme which catalyzes the phosphorylation of fructosamines which may result in deglycation. [provided by RefSeq, Feb 2012]	153	48.8102	1	May initiate a process leading to the deglycation of fructoselysine and of glycated proteins. May play a role in the phosphorylation of 1-deoxy-1-morpholinofructose (DMF), fructoselysine, fructoseglycine, fructose and glycated lysozyme.
6521	P07332	FES	Kinase	Tclin	Tyrosine-protein kinase Fes/Fps	Kinase	0.00305041	This gene encodes the human cellular counterpart of a feline sarcoma retrovirus protein with transforming capabilities. The gene product has tyrosine-specific protein kinase activity and that activity is required for maintenance of cellular transformation. Its chromosomal location has linked it to a specific translocation event identified in patients with acute promyelocytic leukemia but it is al…	416	414.99	1	Tyrosine-protein kinase that acts downstream of cell surface receptors and plays a role in the regulation of the actin cytoskeleton, microtubule assembly, cell attachment and cell spreading. Plays a role in FCER1 (high affinity immunoglobulin epsilon receptor)-mediated signaling in mast cells. Acts down-stream of the activated FCER1 receptor and the mast/stem cell growth factor receptor KIT. Play…	1WQU,2DCR,3BKB,3CBL,3CD3,4DYL,4E93
6562	Q14289	PTK2B	Kinase	Tclin	Protein-tyrosine kinase 2-beta	Kinase	0.00174314	This gene encodes a cytoplasmic protein tyrosine kinase which is involved in calcium-induced regulation of ion channels and activation of the map kinase signaling pathway. The encoded protein may represent an important signaling intermediate between neuropeptide-activated receptors or neurotransmitters that increase calcium flux and the downstream signals that regulate neuronal activity. The enco…	936	712.372	0.333333	Non-receptor protein-tyrosine kinase that regulates reorganization of the actin cytoskeleton, cell polarization, cell migration, adhesion, spreading and bone remodeling. Plays a role in the regulation of the humoral immune response, and is required for normal levels of marginal B-cells in the spleen and normal migration of splenic B-cells. Required for normal macrophage polarization and migration…	2FO6,2LK4,3CC6,3ET7,3FZO,3FZP,3FZR,3FZS,3FZT,3GM1,3GM2,3GM3,3H3C,3U3F,4EKU,4H1J,4H1M,4R32,4XEF,4XEK,4XEV,5TO8,5TOB
6601	Q14296	FASTK	Kinase	Tbio	Fas-activated serine/threonine kinase	Kinase	0.0193551	The protein encoded by this gene is a member of the serine/threonine protein kinase family. This kinase was shown to be activated rapidly during Fas-mediated apoptosis in Jurkat cells. In response to Fas receptor ligation, it phosphorylates TIA1, an apoptosis-promoting nuclear RNA-binding protein. The encoded protein is a strong inducer of lymphocyte apoptosis. Two transcript variants encoding di…	275	95.9922	0.5	Phosphorylates the splicing regulator TIA1, thereby promoting the inclusion of FAS exon 6, which leads to an mRNA encoding a pro-apoptotic form of the receptor.
6618	P22607	FGFR3	Kinase	Tclin	Fibroblast growth factor receptor 3	Kinase	0.00071612	This gene encodes a member of the fibroblast growth factor receptor (FGFR) family, with its amino acid sequence being highly conserved between members and among divergent species. FGFR family members differ from one another in their ligand affinities and tissue distribution. A full-length representative protein would consist of an extracellular region, composed of three immunoglobulin-like domain…	648	1712.69	1	Tyrosine-protein kinase that acts as cell-surface receptor for fibroblast growth factors and plays an essential role in the regulation of cell proliferation, differentiation and apoptosis. Plays an essential role in the regulation of chondrocyte differentiation, proliferation and apoptosis, and is required for normal skeleton development. Regulates both osteogenesis and postnatal bone mineralizat…	1RY7,2LZL,4K33
6624	Q96C11	FGGY	Kinase	Tbio	FGGY carbohydrate kinase domain-containing protein	Kinase	0.0516258	This gene encodes a protein that phosphorylates carbohydrates such as ribulose, ribitol, and L-arabinitol. Genome-wide association studies in some populations have found an association between polymorphisms in this gene and sporadic amyotrophic lateral sclerosis, but studies of other populations have not been able to replicate this association. Alternative splicing results in multiple transcript …	91	24.2054	1.16667
6656	P09769	FGR	Kinase	Tchem	Tyrosine-protein kinase Fgr	Kinase	0.00262848	This gene is a member of the Src family of protein tyrosine kinases (PTKs). The encoded protein contains N-terminal sites for myristylation and palmitylation, a PTK domain, and SH2 and SH3 domains which are involved in mediating protein-protein interactions with phosphotyrosine-containing and proline-rich motifs, respectively. The protein localizes to plasma membrane ruffles, and functions as a n…	513	514.775	1	Non-receptor tyrosine-protein kinase that transmits signals from cell surface receptors devoid of kinase activity and contributes to the regulation of immune responses, including neutrophil, monocyte, macrophage and mast cell functions, cytoskeleton remodeling in response to extracellular stimuli, phagocytosis, cell adhesion and migration. Promotes mast cell degranulation, release of inflammatory…
6662	O14843	FFAR3	GPCR	Tbio	Free fatty acid receptor 3	GPCR	0.00746169		158	199.184	0.142857	G protein-coupled receptor that is activated by a major product of dietary fiber digestion, the short chain fatty acids (SCFAs), and that plays a role in the regulation of whole-body energy homeostasis and in intestinal immunity. In omnivorous mammals, the short chain fatty acids acetate, propionate and butyrate are produced primarily by the gut microbiome that metabolizes dietary fibers. SCFAs s…
6683	P19367	HK1	Kinase	Tchem	Hexokinase-1	Kinase	0.00195554	Hexokinases phosphorylate glucose to produce glucose-6-phosphate, the first step in most glucose metabolism pathways. This gene encodes a ubiquitous form of hexokinase which localizes to the outer membrane of mitochondria. Mutations in this gene have been associated with hemolytic anemia due to hexokinase deficiency. Alternative splicing of this gene results in several transcript variants which e…	776	468.942	0.2		1CZA,1DGK,1HKB,1HKC,1QHA,4F9O,4FOE,4FOI,4FPA,4FPB
6685	P52790	HK3	Kinase	Tbio	Hexokinase-3	Kinase	0.0151241	Hexokinases phosphorylate glucose to produce glucose-6-phosphate, the first step in most glucose metabolism pathways. This gene encodes hexokinase 3. Similar to hexokinases 1 and 2, this allosteric enzyme is inhibited by its product glucose-6-phosphate. [provided by RefSeq, Apr 2009]	421	72.0282	0.111111		3HM8
6686	P35557	GCK	Kinase	Tchem	Glucokinase	Kinase	0.00112778	This gene encodes a member of the hexokinase family of proteins. Hexokinases phosphorylate glucose to produce glucose-6-phosphate, the first step in most glucose metabolism pathways. In contrast to other forms of hexokinase, this enzyme is not inhibited by its product glucose-6-phosphate but remains active while glucose is abundant. The use of multiple promoters and alternative splicing of this g…	480	854.86	0.5	Catalyzes the initial step in utilization of glucose by the beta-cell and liver at physiological glucose concentration. Glucokinase has a high Km for glucose, and so it is effective only when glucose is abundant. The role of GCK is to provide G6P for the synthesis of glycogen. Pancreatic glucokinase plays an important role in modulating insulin secretion. Hepatic glucokinase helps to facilitate t…	1GLK,1V4S,1V4T,3A0I,3F9M,3FGU,3FR0,3GOI,3H1V,3ID8,3IDH,3IMX,3QIC,3S41,3VEV,3VEY,3VF6,4DCH,4DHY,4ISE,4ISF,4ISG,4IWV,4IXC,4L3Q,4LC9,4MLE,4MLH,4NO7,4RCH,5V4W,5V4X
6721	P35367	HRH1	GPCR	Tclin	Histamine H1 receptor	GPCR	0.00073548	Histamine is a ubiquitous messenger molecule released from mast cells, enterochromaffin-like cells, and neurons. Its various actions are mediated by histamine receptors H1, H2, H3 and H4. The protein encoded by this gene is an integral membrane protein and belongs to the G protein-coupled receptor superfamily. It mediates the contraction of smooth muscles, the increase in capillary permeability d…	508	1437.66	0.5	In peripheral tissues, the H1 subclass of histamine receptors mediates the contraction of smooth muscles, increase in capillary permeability due to contraction of terminal venules, and catecholamine release from adrenal medulla, as well as mediating neurotransmission in the central nervous system.	3RZE
6769	P57058	HUNK	Kinase	Tchem	Hormonally up-regulated neu tumor-associated kinase	Kinase	0.0431678		329	33.9624	0.642857
6809	Q96D96	HVCN1	Ion Channel	Tchem	Voltage-gated hydrogen channel 1	IC	0.00195009	This gene encodes a voltage-gated protein channel protein expressed more highly in certain cells of the immune system. Phagocytic cells produce superoxide anions which require this channel protein, and in B cells this same process facilitates antibody production. This same channel protein, however, can also regulate functions in other cells including spermatozoa. Multiple transcript variants enco…	145	713.005	1	Mediates the voltage-dependent proton permeability of excitable membranes. Forms a proton-selective channel through which protons may pass in accordance with their electrochemical gradient. Proton efflux, accompanied by membrane depolarization, facilitates acute production of reactive oxygen species in phagocytosis.	3A2A
6864	Q86Z02	HIPK1	Kinase	Tchem	Homeodomain-interacting protein kinase 1		0.113772	The protein encoded by this gene belongs to the Ser/Thr family of protein kinases and HIPK subfamily. It phosphorylates homeodomain transcription factors and may also function as a co-repressor for homeodomain transcription factors. Alternative splicing results in four transcript variants encoding four distinct isoforms. [provided by RefSeq, Jul 2008]	271	11.4941	0.25	Serine/threonine-protein kinase involved in transcription regulation and TNF-mediated cellular apoptosis. Plays a role as a corepressor for homeodomain transcription factors. Phosphorylates DAXX and MYB. Phosphorylates DAXX in response to stress, and mediates its translocation from the nucleus to the cytoplasm. Inactivates MYB transcription factor activity by phosphorylation. Prevents MAP3K5-JNK …
6873	P27987	ITPKB	Kinase	Tchem	Inositol-trisphosphate 3-kinase B	Kinase	0.0239734	The protein encoded by this protein regulates inositol phosphate metabolism by phosphorylation of second messenger inositol 1,4,5-trisphosphate to Ins(1,3,4,5)P4. The activity of this encoded protein is responsible for regulating the levels of a large number of inositol polyphosphates that are important in cellular signaling. Both calcium/calmodulin and protein phosphorylation mechanisms control …	201	51.0575	0.25
6877	O43187	IRAK2	Kinase	Tbio	Interleukin-1 receptor-associated kinase-like 2	Kinase	0.0149602	IRAK2 encodes the interleukin-1 receptor-associated kinase 2, one of two putative serine/threonine kinases that become associated with the interleukin-1 receptor (IL1R) upon stimulation. IRAK2 is reported to participate in the IL1-induced upregulation of NF-kappaB. [provided by RefSeq, Jul 2008]	644	70.963	0.5	Binds to the IL-1 type I receptor following IL-1 engagement, triggering intracellular signaling cascades leading to transcriptional up-regulation and mRNA stabilization.	3MOP
6878	Q9Y616	IRAK3	Kinase	Tchem	Interleukin-1 receptor-associated kinase 3	Kinase	0.0100121	This gene encodes a member of the interleukin-1 receptor-associated kinase protein family. Members of this family are essential components of the Toll/IL-R immune signal transduction pathways. This protein is primarily expressed in monocytes and macrophages and functions as a negative regulator of Toll-like receptor signaling. Mutations in this gene are associated with a susceptibility to asthma.…	518	136.402	0.333333	Inhibits dissociation of IRAK1 and IRAK4 from the Toll-like receptor signaling complex by either inhibiting the phosphorylation of IRAK1 and IRAK4 or stabilizing the receptor complex.	5UKE
6912	P00568	AK1	Kinase	Tbio	Adenylate kinase isoenzyme 1	Kinase	0.00268549	This gene encodes an adenylate kinase enzyme involved in energy metabolism and homeostasis of cellular adenine nucleotide ratios in different intracellular compartments. This gene is highly expressed in skeletal muscle, brain and erythrocytes. Certain mutations in this gene resulting in a functionally inadequate enzyme are associated with a rare genetic disorder causing nonspherocytic hemolytic a…	566	435.889	1.5	Catalyzes the reversible transfer of the terminal phosphate group between ATP and AMP. Also displays broad nucleoside diphosphate kinase activity. Plays an important role in cellular energy homeostasis and in adenine nucleotide metabolism.	1Z83,2C95
6913	P54819	AK2	Kinase	Tbio	Adenylate kinase 2, mitochondrial	Kinase	0.00581034	Adenylate kinases are involved in regulating the adenine nucleotide composition within a cell by catalyzing the reversible transfer of phosphate groups among adenine nucleotides. Three isozymes of adenylate kinase, namely 1, 2, and 3, have been identified in vertebrates; this gene encodes isozyme 2. Expression of these isozymes is tissue-specific and developmentally regulated. Isozyme 2 is locali…	426	202.865	0.071429	Catalyzes the reversible transfer of the terminal phosphate group between ATP and AMP. Plays an important role in cellular energy homeostasis and in adenine nucleotide metabolism. Adenylate kinase activity is critical for regulation of the phosphate utilization and the AMP de novo biosynthesis pathways. Plays a key role in hematopoiesis.	2C9Y
6914	Q9Y6K8	AK5	Kinase	Tbio	Adenylate kinase isoenzyme 5	Kinase	0.0130158	This gene encodes a member of the adenylate kinase family, which is involved in regulating the adenine nucleotide composition within a cell by catalyzing the reversible transfer of phosphate groups among adenine nucleotides. This member is related to the UMP/CMP kinase of several species. It is located in the cytosol and expressed exclusively in brain. Alternatively spliced transcript variants en…	320	102.169	1	Nucleoside monophosphate (NMP) kinase that catalyzes the reversible transfer of the terminal phosphate group between nucleoside triphosphates and monophosphates. Active on AMP and dAMP with ATP as a donor. When GTP is used as phosphate donor, the enzyme phosphorylates AMP, CMP, and to a small extent dCMP. Also displays broad nucleoside diphosphate kinase activity.	2BWJ
6915	Q96MA6	AK8	Kinase	Tbio	Adenylate kinase 8	Kinase	0.0598326		101	23.0075	0.333333	Nucleoside monophosphate (NMP) kinase that catalyzes the reversible transfer of the terminal phosphate group between nucleoside triphosphates and monophosphates. Has highest activity toward AMP, and weaker activity toward dAMP, CMP and dCMP. Also displays broad nucleoside diphosphate kinase activity.
6933	P08581	MET	Kinase	Tclin	Hepatocyte growth factor receptor	Kinase	0.00037995	This gene encodes a member of the receptor tyrosine kinase family of proteins and the product of the proto-oncogene MET. The encoded preproprotein is proteolytically processed to generate alpha and beta subunits that are linked via disulfide bonds to form the mature receptor. Further processing of the beta subunit results in the formation of the M10 peptide, which has been shown to reduce lung fi…	2650	2866.8	0.125	Receptor tyrosine kinase that transduces signals from the extracellular matrix into the cytoplasm by binding to hepatocyte growth factor/HGF ligand. Regulates many physiological processes including proliferation, scattering, morphogenesis and survival. Ligand binding at the cell surface induces autophosphorylation of MET on its intracellular domain that provides docking sites for downstream signa…	1FYR,1R0P,1R1W,1SHY,1SSL,1UX3,2G15,2RFN,2RFS,2UZX,2UZY,2WD1,2WGJ,2WKM,3A4P,3BUX,3C1X,3CCN,3CD8,3CE3,3CTH,3CTJ,3DKC,3DKF,3DKG,3EFJ,3EFK,3F66,3F82,3I5N,3L8V,3LQ8,3Q6U,3Q6W,3QTI,3R7O,3RHK,3U6H,3U6I,3VW8,3ZBX,3ZC5,3ZCL,3ZXZ,3ZZE,4AOI,4AP7,4DEG,4DEH,4DEI,4EEV,4GG5,4GG7,4IWD,4K3J,4KNB,4MXC,4O3T,4O3U,4R1V,4R1Y,4XMO,4XYF,5DG5,5EOB,5EYC,5EYD,5HLW,5HNI,5HO6,5HOA,5HOR,5HTI,5LSP,5T3Q,5UAB,5UAD,5UAF,5YA5
6937	P48730	CSNK1D	Kinase	Tchem	Casein kinase I isoform delta	Kinase	0.00896935	This gene is a member of the casein kinase I (CKI) gene family whose members have been implicated in the control of cytoplasmic and nuclear processes, including DNA replication and repair. The encoded protein may also be involved in the regulation of apoptosis, circadian rhythm, microtubule dynamics, chromosome segregation, and p53-mediated effects on growth. The encoded protein is highly similar…	346	107.071	1.25	Essential serine/threonine-protein kinase that regulates diverse cellular growth and survival processes including Wnt signaling, DNA repair and circadian rhythms. It can phosphorylate a large number of proteins. Casein kinases are operationally defined by their preferential utilization of acidic proteins such as caseins as substrates. Phosphorylates connexin-43/GJA1, MAP1A, SNAPIN, MAPT/TAU, TOP2…	3UYS,3UYT,3UZP,4HGT,4HNF,4KB8,4KBA,4KBC,4KBK,4TN6,4TW9,4TWC,5IH4,5IH5,5IH6,5MQV,5OKT,5W4W,6GZM
6940	P49674	CSNK1E	Kinase	Tclin	Casein kinase I isoform epsilon	Kinase	0.00891859	This locus represents naturally occurring readthrough transcription between the neighboring LOC400927 (transmembrane phosphoinositide 3-phosphatase and tensin homolog 2 pseudogene) and CSNK1E (casein kinase I isoform epsilon) genes on chromosome 22. The readthrough transcript encodes the same protein as the downstream gene product (casein kinase I isoform epsilon). [provided by RefSeq, Feb 2014]	437	120.133	0.333333	Casein kinases are operationally defined by their preferential utilization of acidic proteins such as caseins as substrates. Can phosphorylate a large number of proteins. Participates in Wnt signaling. Phosphorylates DVL1 and DVL2. Central component of the circadian clock. In balance with PP1, determines the circadian period length, through the regulation of the speed and rhythmicity of PER1 and …	4HNI,4HOK
6941	Q13303	KCNAB2	Ion Channel	Tbio	Voltage-gated potassium channel subunit beta-2		0.0175217	Voltage-gated potassium (Kv) channels represent the most complex class of voltage-gated ion channels from both functional and structural standpoints. Their diverse functions include regulating neurotransmitter release, heart rate, insulin secretion, neuronal excitability, epithelial electrolyte transport, smooth muscle contraction, and cell volume. Four sequence-related potassium channel genes - …	152	61.2421	0.333333	Cytoplasmic potassium channel subunit that modulates the characteristics of the channel-forming alpha-subunits (PubMed:7649300, PubMed:11825900). Contributes to the regulation of nerve signaling, and prevents neuronal hyperexcitability (By similarity). Promotes expression of the pore-forming alpha subunits at the cell membrane, and thereby increases channel activity (By similarity). Promotes pota…	1ZSX
6942	P78368	CSNK1G2	Kinase	Tchem	Casein kinase I isoform gamma-2		0.179301		414	6.35733	1	Serine/threonine-protein kinase. Casein kinases are operationally defined by their preferential utilization of acidic proteins such as caseins as substrates. It can phosphorylate a large number of proteins. Participates in Wnt signaling. Phosphorylates COL4A3BP/CERT, MTA1 and SMAD3. Involved in brain development and vesicular trafficking and neurotransmitter releasing from small synaptic vesicles…	2C47
6947	Q6P2M8	PNCK	Kinase	Tchem	Calcium/calmodulin-dependent protein kinase type 1B		0.130374	PNCK is a member of the calcium/calmodulin-dependent protein kinase family of protein serine/threonine kinases (see CAMK1; MIM 604998) (Gardner et al., 2000 [PubMed 10673339]).[supplied by OMIM, Mar 2008]	192	10.9832	0.5	Calcium/calmodulin-dependent protein kinase belonging to a proposed calcium-triggered signaling cascade. In vitro phosphorylates CREB1 and SYN1/synapsin I. Phosphorylates and activates CAMK1 (By similarity).
6949	Q8IU85	CAMK1D	Kinase	Tchem	Calcium/calmodulin-dependent protein kinase type 1D		0.0274233	This gene is a member of the calcium/calmodulin-dependent protein kinase 1 family, a subfamily of the serine/threonine kinases. The encoded protein is a component of the calcium-regulated calmodulin-dependent protein kinase cascade. It has been associated with multiple processes including regulation of granulocyte function, activation of CREB-dependent gene transcription, aldosterone synthesis, d…	404	44.1135	1	Calcium/calmodulin-dependent protein kinase that operates in the calcium-triggered CaMKK-CaMK1 signaling cascade and, upon calcium influx, activates CREB-dependent gene transcription, regulates calcium-mediated granulocyte function and respiratory burst and promotes basal dendritic growth of hippocampal neurons. In neutrophil cells, required for cytokine-induced proliferative responses and activa…	2JC6
6951	Q96NX5	CAMK1G	Kinase	Tchem	Calcium/calmodulin-dependent protein kinase type 1G		0.125246	This gene encodes a protein similar to calcium/calmodulin dependent protein kinase, however, its exact function is not known. [provided by RefSeq, Jul 2008]	282	12.7267	1	Calcium/calmodulin-dependent protein kinase belonging to a proposed calcium-triggered signaling cascade. In vitro phosphorylates transcription factor CREB1 (By similarity).	2JAM
6956	P08069	IGF1R	Kinase	Tclin	Insulin-like growth factor 1 receptor	Kinase	0.00034532	This receptor binds insulin-like growth factor with a high affinity. It has tyrosine kinase activity. The insulin-like growth factor I receptor plays a critical role in transformation events. Cleavage of the precursor generates alpha and beta subunits. It is highly overexpressed in most malignant tissues where it functions as an anti-apoptotic agent by enhancing cell survival. Alternatively splic…	2145	3436.91	0.2	Receptor tyrosine kinase which mediates actions of insulin-like growth factor 1 (IGF1). Binds IGF1 with high affinity and IGF2 and insulin (INS) with a lower affinity. The activated IGF1R is involved in cell growth and survival control. IGF1R is crucial for tumor transformation and survival of malignant cell. Ligand binding activates the receptor kinase, leading to receptor autophosphorylation, a…	1IGR,1JQH,1K3A,1M7N,1P4O,2OJ9,2ZM3,3D94,3F5P,3I81,3LVP,3LW0,3NW5,3NW6,3NW7,3O23,3QQU,4D2R,4XSS,5FXQ,5FXR,5FXS,5HZN,5U8Q,5U8R
6967	Q14680	MELK	Kinase	Tchem	Maternal embryonic leucine zipper kinase	Kinase	0.00762154		436	187.379	1	Serine/threonine-protein kinase involved in various processes such as cell cycle regulation, self-renewal of stem cells, apoptosis and splicing regulation. Has a broad substrate specificity; phosphorylates BCL2L14, CDC25B, MAP3K5/ASK1 and ZNF622. Acts as an activator of apoptosis by phosphorylating and activating MAP3K5/ASK1. Acts as a regulator of cell cycle, notably by mediating phosphorylation…	4BKY,4BKZ,4BL1,4D2P,4D2T,4D2V,4D2W,4IXP,4UMP,4UMQ,4UMR,4UMT,4UMU,5IH8,5IH9,5IHA,5IHC,5K00,5M5A,5MAF,5MAG,5MAH,5MAI,5TVT,5TWL,5TWU,5TWY,5TWZ,5TX3
6974	Q08881	ITK	Kinase	Tclin	Tyrosine-protein kinase ITK/TSK	Kinase	0.00054195	This gene encodes an intracellular tyrosine kinase expressed in T-cells. The protein contains both SH2 and SH3 domains which are often found in intracellular kinases. It is thought to play a role in T-cell proliferation and differentiation. [provided by RefSeq, Jul 2008]	465	2864.42	2	Tyrosine kinase that plays an essential role in regulation of the adaptive immune response. Regulates the development, function and differentiation of conventional T-cells and nonconventional NKT-cells. When antigen presenting cells (APC) activate T-cell receptor (TCR), a series of phosphorylation lead to the recruitment of ITK to the cell membrane, in the vicinity of the stimulated TCR receptor,…	1SM2,1SNU,1SNX,2E6I,2LMJ,2YUQ,3MIY,3MJ1,3MJ2,3QGW,3QGY,3T9T,3V5J,3V5L,3V8T,3V8W,4HCT,4HCU,4HCV,4KIO,4L7S,4M0Y,4M0Z,4M12,4M13,4M14,4M15,4MF0,4MF1,4PP9,4PPA,4PPB,4PPC,4PQN,4QD6,4RFM
6981	Q13572	ITPK1	Kinase	Tbio	Inositol-tetrakisphosphate 1-kinase	Kinase	0.0279026	This gene encodes an enzyme that belongs to the inositol 1,3,4-trisphosphate 5/6-kinase family. This enzyme regulates the synthesis of inositol tetraphosphate, and downstream products, inositol pentakisphosphate and inositol hexakisphosphate. Inositol metabolism plays a role in the development of the neural tube. Disruptions in this gene are thought to be associated with neural tube defects. A ps…	268	42.823	1	Kinase that can phosphorylate various inositol polyphosphate such as Ins(3,4,5,6)P4 or Ins(1,3,4)P3. Phosphorylates Ins(3,4,5,6)P4 at position 1 to form Ins(1,3,4,5,6)P5. This reaction is thought to have regulatory importance, since Ins(3,4,5,6)P4 is an inhibitor of plasma membrane Ca(2+)-activated Cl(-) channels, while Ins(1,3,4,5,6)P5 is not. Also phosphorylates Ins(1,3,4)P3 on O-5 and O-6 to f…	2ODT,2Q7D,2QB5
6994	P52333	JAK3	Kinase	Tclin	Tyrosine-protein kinase JAK3	Kinase	0.00164278	The protein encoded by this gene is a member of the Janus kinase (JAK) family of tyrosine kinases involved in cytokine receptor-mediated intracellular signal transduction. It is predominantly expressed in immune cells and transduces a signal in response to its activation via tyrosine phosphorylation by interleukin receptors. Mutations in this gene are associated with autosomal SCID (severe combin…	416	708.298	0.125	Non-receptor tyrosine kinase involved in various processes such as cell growth, development, or differentiation. Mediates essential signaling events in both innate and adaptive immunity and plays a crucial role in hematopoiesis during T-cells development. In the cytoplasm, plays a pivotal role in signal transduction via its association with type I receptors sharing the common subunit gamma such a…	1YVJ,3LXK,3LXL,3PJC,3ZC6,3ZEP,4HVD,4HVG,4HVH,4HVI,4I6Q,4QPS,4QT1,4RIO,4V0G,4Z16,5LWM,5LWN,5TOZ,5TTS,5TTU,5TTV,5VO6,5W86,5WFJ,6AAK,6GL9,6GLA,6GLB
7008	P22694	PRKACB	Kinase	Tchem	cAMP-dependent protein kinase catalytic subunit beta		0.0196222	The protein encoded by this gene is a member of the serine/threonine protein kinase family. The encoded protein is a catalytic subunit of cAMP (cyclic AMP)-dependent protein kinase, which mediates signalling though cAMP. cAMP signaling is important to a number of processes, including cell proliferaton and differentiation. Multiple alternatively spliced transcript variants encoding distinct isofor…	374	58.7788	0.333333	Mediates cAMP-dependent signaling triggered by receptor binding to GPCRs. PKA activation regulates diverse cellular processes such as cell proliferation, the cell cycle, differentiation and regulation of microtubule dynamics, chromatin condensation and decondensation, nuclear envelope disassembly and reassembly, as well as regulation of intracellular transport mechanisms and ion flux. Regulates t…
7009	P22612	PRKACG	Kinase	Tchem	cAMP-dependent protein kinase catalytic subunit gamma		0.110801	Cyclic AMP-dependent protein kinase (PKA) consists of two catalytic subunits and a regulatory subunit dimer. This gene encodes the gamma form of its catalytic subunit. The gene is intronless and is thought to be a retrotransposon derived from the gene for the alpha form of the PKA catalytic subunit. [provided by RefSeq, Jul 2008]	194	8.18823	1	Phosphorylates a large number of substrates in the cytoplasm and the nucleus.
7016	Q14722	KCNAB1	Ion Channel	Tbio	Voltage-gated potassium channel subunit beta-1	IC	0.014137	Potassium channels represent the most complex class of voltage-gated ion channels from both functional and structural standpoints. Their diverse functions include regulating neurotransmitter release, heart rate, insulin secretion, neuronal excitability, epithelial electrolyte transport, smooth muscle contraction, and cell volume. Four sequence-related potassium channel genes - shaker, shaw, shab,…	339	70.2263	0.583333	Cytoplasmic potassium channel subunit that modulates the characteristics of the channel-forming alpha-subunits (PubMed:7499366, PubMed:7603988, PubMed:17156368,PubMed:17540341, PubMed:19713757). Modulates action potentials via its effect on the pore-forming alpha subunits (By similarity). Promotes expression of the pore-forming alpha subunits at the cell membrane, and thereby increases channel ac…
7017	O43448	KCNAB3	Ion Channel	Tbio	Voltage-gated potassium channel subunit beta-3		0.101282	This gene encodes a member of the potassium channel, voltage-gated, shaker-related subfamily. The encoded protein is one of the beta subunits, which are auxiliary proteins associating with functional Kv-alpha subunits. The encoded protein forms a heterodimer with the potassium voltage-gated channel, shaker-related subfamily, member 5 gene product and regulates the activity of the alpha subunit. […	143	8.86899	0.166667	Accessory potassium channel protein which modulates the activity of the pore-forming alpha subunit. Alters the functional properties of Kv1.5.
7018	Q9Y6M4	CSNK1G3	Kinase	Tchem	Casein kinase I isoform gamma-3		0.0758407	This gene encodes a member of a family of serine/threonine protein kinases that phosphorylate caseins and other acidic proteins. A related protein in the African clawed frog participates in the transmission of Wnt/beta-catenin signaling. Alternatively spliced transcript variants encoding multiple isoforms have been observed for this gene. [provided by RefSeq, Jul 2012]	157	11.4562	1	Serine/threonine-protein kinase. Casein kinases are operationally defined by their preferential utilization of acidic proteins such as caseins as substrates. It can phosphorylate a large number of proteins. Participates in Wnt signaling. Regulates fast synaptic transmission mediated by glutamate (By similarity).	2CHL,2IZR,2IZS,2IZT,2IZU,4G16,4G17,4HGL,4HGS,6GRO
7019	Q13554	CAMK2B	Kinase	Tchem	Calcium/calmodulin-dependent protein kinase type II subunit beta	Kinase	0.00793595	The product of this gene belongs to the serine/threonine protein kinase family and to the Ca(2+)/calmodulin-dependent protein kinase subfamily. Calcium signaling is crucial for several aspects of plasticity at glutamatergic synapses. In mammalian cells, the enzyme is composed of four different chains: alpha, beta, gamma, and delta. The product of this gene is a beta chain. It is possible that dis…	484	164.41	0.333333	Calcium/calmodulin-dependent protein kinase that functions autonomously after Ca(2+)/calmodulin-binding and autophosphorylation, and is involved in dendritic spine and synapse formation, neuronal plasticity and regulation of sarcoplasmic reticulum Ca(2+) transport in skeletal muscle. In neurons, plays an essential structural role in the reorganization of the actin cytoskeleton during plasticity b…	3BHH
7021	Q16566	CAMK4	Kinase	Tbio	Calcium/calmodulin-dependent protein kinase type IV	Kinase	0.00412444	The product of this gene belongs to the serine/threonine protein kinase family, and to the Ca(2+)/calmodulin-dependent protein kinase subfamily. This enzyme is a multifunctional serine/threonine protein kinase with limited tissue distribution, that has been implicated in transcriptional regulation in lymphocytes, neurons and male germ cells. [provided by RefSeq, Jul 2008]	550	265.11	1	Calcium/calmodulin-dependent protein kinase that operates in the calcium-triggered CaMKK-CaMK4 signaling cascade and regulates, mainly by phosphorylation, the activity of several transcription activators, such as CREB1, MEF2D, JUN and RORA, which play pivotal roles in immune response, inflammation, and memory consolidation. In the thymus, regulates the CD4(+)/CD8(+) double positive thymocytes sel…	2W4O
7022	Q9UNX9	KCNJ14	Ion Channel	Tchem	ATP-sensitive inward rectifier potassium channel 14		0.0570764	Potassium channels are present in most mammalian cells, where they participate in a wide range of physiologic responses. The protein encoded by this gene is an integral membrane protein and inward-rectifier type potassium channel, and probably has a role in controlling the excitability of motor neurons. [provided by RefSeq, Feb 2013]	11	20.4204	0.333333	Inward rectifier potassium channels are characterized by a greater tendency to allow potassium to flow into the cell rather than out of it. Their voltage dependence is regulated by the concentration of extracellular potassium; as external potassium is raised, the voltage range of the channel opening shifts to more positive voltages. The inward rectification is mainly due to the blockage of outwar…
7023	Q99712	KCNJ15	Ion Channel	Tbio	ATP-sensitive inward rectifier potassium channel 15		0.0329971	Potassium channels are present in most mammalian cells, where they participate in a wide range of physiologic responses. The protein encoded by this gene is an integral membrane protein and inward-rectifier type potassium channel. The encoded protein has a greater tendency to allow potassium to flow into a cell rather than out of a cell. Eight transcript variants encoding the same protein have be…	166	38.6242	2.33333	Inward rectifier potassium channels are characterized by a greater tendency to allow potassium to flow into the cell rather than out of it. Their voltage dependence is regulated by the concentration of extracellular potassium; as external potassium is raised, the voltage range of the channel opening shifts to more positive voltages. The inward rectification is mainly due to the blockage of outwar…
7024	Q9NPI9	KCNJ16	Ion Channel	Tbio	Inward rectifier potassium channel 16	IC	0.0188383	Potassium channels are present in most mammalian cells, where they participate in a wide range of physiologic responses. The protein encoded by this gene is an integral membrane protein and inward-rectifier type potassium channel. The encoded protein, which tends to allow potassium to flow into rather than out of a cell, can form heterodimers with two other inward-rectifier type potassium channel…	152	59.4257	0.25	Inward rectifier potassium channels are characterized by a greater tendency to allow potassium to flow into the cell rather than out of it. Their voltage dependence is regulated by the concentration of extracellular potassium; as external potassium is raised, the voltage range of the channel opening shifts to more positive voltages. The inward rectification is mainly due to the blockage of outwar…
7025	B7U540	KCNJ18	Ion Channel	Tbio	Inward rectifier potassium channel 18		0.0565803	This gene encodes a member of the inwardly rectifying potassium channel family. Transcription of this locus is regulated by thyroid hormone, and the encoded protein plays a role in resting membrane potential maintenance. Mutations in this locus have been associated with thyrotoxic hypokalemic periodic paralysis. [provided by RefSeq, Jan 2013]	46	30.1312	1.33333	Inward rectifier potassium channels are characterized by a greater tendency to allow potassium to flow into the cell rather than out of it. Their voltage dependence is regulated by the concentration of extracellular potassium; as external potassium is raised, the voltage range of the channel opening shifts to more positive voltages. The inward rectification is mainly due to the blockage of outwar…
7028	P17658	KCNA6	Ion Channel	Tclin	Potassium voltage-gated channel subfamily A member 6		18.1909	Potassium channels represent the most complex class of voltage-gated ion channels from both functional and structural standpoints. Their diverse functions include regulating neurotransmitter release, heart rate, insulin secretion, neuronal excitability, epithelial electrolyte transport, smooth muscle contraction, and cell volume. Four sequence-related potassium channel genes - shaker, shaw, shab,…	111	0.03366	0.125	Voltage-gated potassium channel that mediates transmembrane potassium transport in excitable membranes. Forms tetrameric potassium-selective channels through which potassium ions pass in accordance with their electrochemical gradient (PubMed:2347305, PubMed:14575698). The channel alternates between opened and closed conformations in response to the voltage difference across the membrane (PubMed:2…
7029	Q96RP8	KCNA7	Ion Channel	Tclin	Potassium voltage-gated channel subfamily A member 7		0.0806274	Potassium channels represent the most complex class of voltage-gated ion channels from both functional and structural standpoints. Their diverse functions include regulating neurotransmitter release, heart rate, insulin secretion, neuronal excitability, epithelial electrolyte transport, smooth muscle contraction, and cell volume. Four sequence-related potassium channel genes - shaker, shaw, shab,…	69	13.2044	0.333333	Mediates the voltage-dependent potassium ion permeability of excitable membranes. Assuming opened or closed conformations in response to the voltage difference across the membrane, the protein forms a potassium-selective channel through which potassium ions may pass in accordance with their electrochemical gradient (By similarity).
7031	Q16558	KCNMB1	Ion Channel	Tbio	Calcium-activated potassium channel subunit beta-1	IC	0.00736653	MaxiK channels are large conductance, voltage and calcium-sensitive potassium channels which are fundamental to the control of smooth muscle tone and neuronal excitability. MaxiK channels can be formed by 2 subunits: the pore-forming alpha subunit and the product of this gene, the modulatory beta subunit. Intracellular calcium regulates the physical association between the alpha and beta subunits…	169	144.505	0.25	Regulatory subunit of the calcium activated potassium KCNMA1 (maxiK) channel. Modulates the calcium sensitivity and gating kinetics of KCNMA1, thereby contributing to KCNMA1 channel diversity. Increases the apparent Ca(2+)/voltage sensitivity of the KCNMA1 channel. It also modifies KCNMA1 channel kinetics and alters its pharmacological properties. It slows down the activation and the deactivation…
7033	Q9NPA1	KCNMB3	Ion Channel	Tbio	Calcium-activated potassium channel subunit beta-3		0.0871785	MaxiK channels are large conductance, voltage and calcium-sensitive potassium channels which are fundamental to the control of smooth muscle tone and neuronal excitability. MaxiK channels can be formed by 2 subunits: the pore-forming alpha subunit and the modulatory beta subunit. The protein encoded by this gene is an auxiliary beta subunit which may partially inactivate or slightly decrease the …	258	9.55046	0.25	Regulatory subunit of the calcium activated potassium KCNMA1 (maxiK) channel. Modulates the calcium sensitivity and gating kinetics of KCNMA1, thereby contributing to KCNMA1 channel diversity. Alters the functional properties of the current expressed by the KCNMA1 channel. Isoform 2, isoform 3 and isoform 4 partially inactivate the current of KCNBMA. Isoform 4 induces a fast and incomplete inacti…
7034	P48547	KCNC1	Ion Channel	Tclin	Potassium voltage-gated channel subfamily C member 1	IC	0.00252943	This gene encodes a member of a family of integral membrane proteins that mediate the voltage-dependent potassium ion permeability of excitable membranes. Alternative splicing is thought to result in two transcript variants encoding isoforms that differ at their C-termini. These isoforms have had conflicting names in the literature: the longer isoform has been called both "b" and "alpha", while t…	381	418.323	0.166667	Voltage-gated potassium channel that plays an important role in the rapid repolarization of fast-firing brain neurons. The channel opens in response to the voltage difference across the membrane, forming a potassium-selective channel through which potassium ions pass in accordance with their electrochemical gradient (PubMed:25401298). Can form functional homotetrameric channels and heterotetramer…
7035	P56696	KCNQ4	Ion Channel	Tclin	Potassium voltage-gated channel subfamily KQT member 4	IC	0.00626926	The protein encoded by this gene forms a potassium channel that is thought to play a critical role in the regulation of neuronal excitability, particularly in sensory cells of the cochlea. The current generated by this channel is inhibited by M1 muscarinic acetylcholine receptors and activated by retigabine, a novel anti-convulsant drug. The encoded protein can form a homomultimeric potassium cha…	333	194.266	0.533333	Probably important in the regulation of neuronal excitability. May underlie a potassium current involved in regulating the excitability of sensory cells of the cochlea. KCNQ4 channels are blocked by linopirdin, XE991 and bepridil, whereas clofilium is without significant effect. Muscarinic agonist oxotremorine-M strongly suppress KCNQ4 current in CHO cells in which cloned KCNQ4 channels were coex…	2OVC,4GOW
7036	Q9NR82	KCNQ5	Ion Channel	Tclin	Potassium voltage-gated channel subfamily KQT member 5	IC	0.0127184	This gene is a member of the KCNQ potassium channel gene family that is differentially expressed in subregions of the brain and in skeletal muscle. The protein encoded by this gene yields currents that activate slowly with depolarization and can form heteromeric channels with the protein encoded by the KCNQ3 gene. Currents expressed from this protein have voltage dependences and inhibitor sensiti…	224	90.1114	0.533333	Associates with KCNQ3 to form a potassium channel which contributes to M-type current, a slowly activating and deactivating potassium conductance which plays a critical role in determining the subthreshold electrical excitability of neurons. Therefore, it is important in the regulation of neuronal excitability. May contribute, with other potassium channels, to the molecular diversity of a heterog…	6B8Q
7038	Q96KK3	KCNS1	Ion Channel	Tclin	Potassium voltage-gated channel subfamily S member 1		0.0646599	Voltage-gated potassium channels form the largest and most diversified class of ion channels and are present in both excitable and nonexcitable cells. Their main functions are associated with the regulation of the resting membrane potential and the control of the shape and frequency of action potentials. The alpha subunits are of 2 types: those that are functional by themselves and those that are…	51	17.9488	0.5	Potassium channel subunit that does not form functional channels by itself. Can form functional heterotetrameric channels with KCNB1 and KCNB2; modulates the delayed rectifier voltage-gated potassium channel activation and deactivation rates of KCNB1 and KCNB2 (PubMed:10484328).
7070	Q12866	MERTK	Kinase	Tchem	Tyrosine-protein kinase Mer	Kinase	0.00382373	This gene is a member of the MER/AXL/TYRO3 receptor kinase family and encodes a transmembrane protein with two fibronectin type-III domains, two Ig-like C2-type (immunoglobulin-like) domains, and one tyrosine kinase domain. Mutations in this gene have been associated with disruption of the retinal pigment epithelium (RPE) phagocytosis pathway and onset of autosomal recessive retinitis pigmentosa …	780	420.714	1	Receptor tyrosine kinase that transduces signals from the extracellular matrix into the cytoplasm by binding to several ligands including LGALS3, TUB, TULP1 or GAS6. Regulates many physiological processes including cell survival, migration, differentiation, and phagocytosis of apoptotic cells (efferocytosis). Ligand binding at the cell surface induces autophosphorylation of MERTK on its intracell…	2DBJ,2P0C,3BPR,3BRB,3TCP,4M3Q,4MH7,4MHA,5K0K,5K0X,5TC0,5TD2,5U6C
7074	Q14643	ITPR1	Ion Channel	Tchem	Inositol 1,4,5-trisphosphate receptor type 1	IC	0.00111834	This gene encodes an intracellular receptor for inositol 1,4,5-trisphosphate. Upon stimulation by inositol 1,4,5-trisphosphate, this receptor mediates calcium release from the endoplasmic reticulum. Mutations in this gene cause spinocerebellar ataxia type 15, a disease associated with an heterogeneous group of cerebellar disorders. Multiple transcript variants have been identified for this gene. …	354	1089.98	1.5	Intracellular channel that mediates calcium release from the endoplasmic reticulum following stimulation by inositol 1,4,5-trisphosphate (PubMed:27108797). Involved in the regulation of epithelial secretion of electrolytes and fluid through the interaction with AHCYL1 (By similarity). Plays a role in ER stress-induced apoptosis. Cytoplasmic calcium released from the ER triggers apoptosis by the a…
7076	Q14571	ITPR2	Ion Channel	Tbio	Inositol 1,4,5-trisphosphate receptor type 2	IC	0.00619813	The protein encoded by this gene belongs to the inositol 1,4,5-triphosphate receptor family, whose members are second messenger intracellular calcium release channels. These proteins mediate a rise in cytoplasmic calcium in response to receptor activated production of inositol triphosphate. Inositol triphosphate receptor-mediated signaling is involved in many processes including cell migration, c…	112	188.222	1.25	Receptor for inositol 1,4,5-trisphosphate, a second messenger that mediates the release of intracellular calcium. This release is regulated by cAMP both dependently and independently of PKA (By similarity).
7077	Q14573	ITPR3	Ion Channel	Tchem	Inositol 1,4,5-trisphosphate receptor type 3	IC	0.00154917	This gene encodes a receptor for inositol 1,4,5-trisphosphate, a second messenger that mediates the release of intracellular calcium. The receptor contains a calcium channel at the C-terminus and the ligand-binding site at the N-terminus. Knockout studies in mice suggest that type 2 and type 3 inositol 1,4,5-trisphosphate receptors play a key role in exocrine secretion underlying energy metabolis…	136	735.255	1	Receptor for inositol 1,4,5-trisphosphate, a second messenger that mediates the release of intracellular calcium.	6DQJ,6DQN,6DQS,6DQV,6DQZ,6DR0,6DR2,6DRA,6DRC
7146	Q5TCS8	AK9	Kinase	Tbio	Adenylate kinase 9	Kinase	0.0630636	The protein encoded by this gene catalyzes the interconversion of nucleosides, possessing both nucleoside monophosphate and diphosphate kinase activities. The encoded protein uses these interconversions to maintain nucleoside homeostasis. [provided by RefSeq, Jul 2016]	126	20.5521	1	Involved in maintaining the homeostasis of cellular nucleotides by catalyzing the interconversion of nucleoside phosphates. Has both nucleoside monophosphate and diphosphate kinase activities. Catalyzes the phosphorylation of AMP, dAMP, CMP and dCMP with ATP as phosphate donor and of CMP with GTP as phosphate donor. Also catalyzes the production of ATP, CTP, GTP, UTP, dATP, dCTP, dGTP and TTP fro…
7520	Q7RTX0	TAS1R3	GPCR	Tbio	Taste receptor type 1 member 3	GPCR	0.00370936	The protein encoded by this gene is a G-protein coupled receptor involved in taste responses. The encoded protein can form a heterodimeric receptor with TAS1R1 to elicit the umami taste response, or it can bind with TAS1R2 to form a receptor for the sweet taste response. [provided by RefSeq, Nov 2015]	301	347.575	1	Putative taste receptor. TAS1R1/TAS1R3 responds to the umami taste stimulus (the taste of monosodium glutamate). TAS1R2/TAS1R3 recognizes diverse natural and synthetic sweeteners. TAS1R3 is essential for the recognition and response to the disaccharide trehalose (By similarity). Sequence differences within and between species can significantly influence the selectivity and specificity of taste re…
7537	Q9BXA7	TSSK1B	Kinase	Tchem	Testis-specific serine/threonine-protein kinase 1		0.0193104	TSSK1 belongs to a family of serine/threonine kinases highly expressed in testis (Hao et al., 2004 [PubMed 15044604]).[supplied by OMIM, Mar 2008]	36	62.0289	0.5	Testis-specific serine/threonine-protein kinase required during spermatid development. Phosphorylates 'Ser-288' of TSKS. Involved in the late stages of spermatogenesis, during the reconstruction of the cytoplasm. During spermatogenesis, required for the transformation of a ring-shaped structure around the base of the flagellum originating from the chromatoid body.
7538	Q5TCY1	TTBK1	Kinase	Tbio	Tau-tubulin kinase 1		0.047699	Summary:This gene belongs to the casein kinase 1 superfamily. The encoded protein is a neuron-specific, serine/threonine and tyrosine kinase, which regulates phosphorylation of tau, a protein that associates with microtubule assemblies and stabilizes them. Genetic variants in this gene are associated with Alzheimer's disease. [provided by RefSeq, Jul 2016]	176	29.6396	1	Serine/threonine kinase which is able to phosphorylate TAU on serine, threonine and tyrosine residues. Induces aggregation of TAU.	4BTJ,4BTK,4BTM,4NFM,4NFN
7541	Q9BXA6	TSSK6	Kinase	Tbio	Testis-specific serine/threonine-protein kinase 6		0.0168427	This intronless gene encodes a member of the CAMK (calcium/calmodulin-dependent) serine/threonine protein kinase family. The encoded kinase has a broad expression pattern but is described as testis-specific due to effects on fertility. Male mice which lack the gene encoding a highly similar protein are sterile and have morphologically abnormal sperm. [provided by RefSeq, Jan 2012]	154	119.901	0.333333	Required for sperm production and function. Plays a role in DNA condensation during postmeiotic chromatin remodeling (By similarity).
7559	Q9H1D0	TRPV6	Ion Channel	Tchem	Transient receptor potential cation channel subfamily V member 6	IC	0.00383629	This gene encodes a member of a family of multipass membrane proteins that functions as calcium channels. The encoded protein contains N-terminal ankyrin repeats, which are required for channel assembly and regulation. Translation initiation for this protein occurs at a non-AUG start codon that is decoded as methionine. This gene is situated next to a closely related gene for transient receptor p…	176	336.239	1	Calcium selective cation channel that mediates Ca(2+) uptake in various tissues, including the intestine (PubMed:11097838, PubMed:11278579, PubMed:11248124 PubMed:15184369, PubMed:23612980, PubMed:29258289). Important for normal Ca(2+) ion homeostasis in the body, including bone and skin (By similarity). The channel is activated by low internal calcium level, probably including intracellular calc…	6BO8,6BO9,6BOA,6D7S,6D7T,6E2F
7566	Q13507	TRPC3	Ion Channel	Tchem	Short transient receptor potential channel 3	IC	0.00268752	The protein encoded by this gene is a membrane protein that can form a non-selective channel permeable to calcium and other cations. The encoded protein appears to be induced to form channels by a receptor tyrosine kinase-activated phosphatidylinositol second messenger system and also by depletion of intracellular calcium stores. Two transcript variants encoding different isoforms have been found…	257	425.679	0.25	Thought to form a receptor-activated non-selective calcium permeant cation channel. Probably is operated by a phosphatidylinositol second messenger system activated by receptor tyrosine kinases or G-protein coupled receptors. Activated by diacylglycerol (DAG) in a membrane-delimited fashion, independently of protein kinase C, and by inositol 1,4,5-triphosphate receptors (ITPR) with bound IP3. May…	5ZBG,6CUD,6D7L,6DJS
7567	Q9UBN4	TRPC4	Ion Channel	Tchem	Short transient receptor potential channel 4	IC	0.00339889	This gene encodes a member of the canonical subfamily of transient receptor potential cation channels. The encoded protein forms a non-selective calcium-permeable cation channel that is activated by Gq-coupled receptors and tyrosine kinases, and plays a role in multiple processes including endothelial permeability, vasodilation, neurotransmitter release and cell proliferation. Single nucleotide p…	279	336.1	0.25	Form a receptor-activated non-selective calcium permeant cation channel. Acts as a cell-cell contact-dependent endothelial calcium entry channel. Probably operated by a phosphatidylinositol second messenger system activated by receptor tyrosine kinases or G-protein coupled receptors. Mediates cation entry, with an enhanced permeability to barium over calcium. May also be activated by intracellula…
7591	Q6SA08	TSSK4	Kinase	Tbio	Testis-specific serine/threonine-protein kinase 4		0.148932	This gene encodes a member of the testis-specific serine/threonine kinase family. The encoded protein is thought to be involved in spermatogenesis via stimulation of the CREB/CRE responsive pathway through phosphorylation of the cAMP responsive element binding protein transcription factor. Alternative splicing results in multiple transcript variants.[provided by RefSeq, May 2010]	129	9.51028	0.25	Serine/threonine kinase which is involved in male germ cell development and in mature sperm function (By similarity). May be involved in the Cre/Creb signaling pathway (By similarity). Phosphorylates CREB1 on 'Ser-133' in vitro and can stimulate Cre/Creb pathway in cells (PubMed:15964553). Phosphorylates CREM on 'Ser-116' in vitro (By similarity). Phosphorylates ODF2 on 'Ser-95' (By similarity).
7610	Q9UL62	TRPC5	Ion Channel	Tchem	Short transient receptor potential channel 5	IC	0.00406517	This gene belongs to the transient receptor family. It encodes one of the seven mammalian TRPC (transient receptor potential channel) proteins. The encoded protein is a multi-pass membrane protein and is thought to form a receptor-activated non-selective calcium permeant cation channel. The protein is active alone or as a heteromultimeric assembly with TRPC1, TRPC3, and TRPC4. It also interacts w…	270	285.682	0.25	Thought to form a receptor-activated non-selective calcium permeant cation channel. Probably is operated by a phosphatidylinositol second messenger system activated by receptor tyrosine kinases or G-protein coupled receptors. Has also been shown to be calcium-selective (By similarity). May also be activated by intracellular calcium store depletion.
7611	Q9Y210	TRPC6	Ion Channel	Tchem	Short transient receptor potential channel 6	IC	0.00118598	The protein encoded by this gene forms a receptor-activated calcium channel in the cell membrane. The channel is activated by diacylglycerol and is thought to be under the control of a phosphatidylinositol second messenger system. Activation of this channel occurs independently of protein kinase C and is not triggered by low levels of intracellular calcium. Defects in this gene are a cause of foc…	391	965.431	0.333333	Thought to form a receptor-activated non-selective calcium permeant cation channel (PubMed:19936226, PubMed:23291369). Probably is operated by a phosphatidylinositol second messenger system activated by receptor tyrosine kinases or G-protein coupled receptors. Activated by diacylglycerol (DAG) in a membrane-delimited fashion, independently of protein kinase C (PubMed:26892346). Seems not to be ac…	5YX9
7612	Q8NER1	TRPV1	Ion Channel	Tclin	Transient receptor potential cation channel subfamily V member 1	IC	0.00039493	Capsaicin, the main pungent ingredient in hot chili peppers, elicits a sensation of burning pain by selectively activating sensory neurons that convey information about noxious stimuli to the central nervous system. The protein encoded by this gene is a receptor for capsaicin and is a non-selective cation channel that is structurally related to members of the TRP family of ion channels. This rece…	493	6643.12	0.142857	Ligand-activated non-selective calcium permeant cation channel involved in detection of noxious chemical and thermal stimuli. Seems to mediate proton influx and may be involved in intracellular acidosis in nociceptive neurons. Involved in mediation of inflammatory pain and hyperalgesia. Sensitized by a phosphatidylinositol second messenger system activated by receptor tyrosine kinases, which invo…
7615	Q9HCX4	TRPC7	Ion Channel	Tchem	Short transient receptor potential channel 7	IC	0.0033307		280	221.793	1	Thought to form a receptor-activated non-selective calcium permeant cation channel. Probably is operated by a phosphatidylinositol second messenger system activated by receptor tyrosine kinases or G-protein coupled receptors. Activated by diacylglycerol (DAG) (By similarity). May also be activated by intracellular calcium store depletion.
7616	P48995	TRPC1	Ion Channel	Tbio	Short transient receptor potential channel 1	IC	0.00233677	The protein encoded by this gene is a membrane protein that can form a non-selective channel permeable to calcium and other cations. The encoded protein appears to be induced to form channels by a receptor tyrosine kinase-activated phosphatidylinositol second messenger system and also by depletion of intracellular calcium stores. Two transcript variants encoding different isoforms have been found…	229	510.274	0.25	Thought to form a receptor-activated non-selective calcium permeant cation channel. Probably is operated by a phosphatidylinositol second messenger system activated by receptor tyrosine kinases or G-protein coupled receptors. Seems to be also activated by intracellular calcium store depletion.
7626	Q8WZ42	TTN	Kinase	Tbio	Titin	Kinase	0.00040356	This gene encodes a large abundant protein of striated muscle. The product of this gene is divided into two regions, a N-terminal I-band and a C-terminal A-band. The I-band, which is the elastic part of the molecule, contains two regions of tandem immunoglobulin domains on either side of a PEVK region that is rich in proline, glutamate, valine and lysine. The A-band, which is thought to act as a …	178	3227.99	1	Key component in the assembly and functioning of vertebrate striated muscles. By providing connections at the level of individual microfilaments, it contributes to the fine balance of forces between the two halves of the sarcomere. The size and extensibility of the cross-links are the main determinants of sarcomere extensibility properties of muscle. In non-muscle cells, seems to play a role in c…	1BPV,1G1C,1NCT,1NCU,1TIT,1TIU,1TKI,1TNM,1TNN,1WAA,1YA5,2A38,2BK8,2F8V,2ILL,2J8H,2J8O,2NZI,2RQ8,2WP3,2WWK,2WWM,2Y9R,3B43,3KNB,3LCY,3LPW,3PUC,3Q5O,3QP3,4C4K,4JNW,4O00,4QEG,4UOW,5BS0,5JDD,5JDE,5JDJ,5JOE
7666	Q8NHX9	TPCN2	Ion Channel	Tchem	Two pore calcium channel protein 2	IC	0.0135113	This gene encodes a putative cation-selective ion channel with two repeats of a six-transmembrane-domain. The protein localizes to lysosomal membranes and enables nicotinic acid adenine dinucleotide phosphate (NAADP) -induced calcium ion release from lysosome-related stores. This ubiquitously expressed gene has elevated expression in liver and kidney. Two common nonsynonymous SNPs in this gene st…	71	123.955	0.5	Nicotinic acid adenine dinucleotide phosphate (NAADP) receptor that may function as one of the major voltage-gated Ca(2+) channels (VDCC) across the lysosomal membrane. May be involved in smooth muscle contraction.
7673	Q7RTX1	TAS1R1	GPCR	Tbio	Taste receptor type 1 member 1	GPCR	0.00913004	The protein encoded by this gene is a G protein-coupled receptor and is a component of the heterodimeric amino acid taste receptor T1R1+3. The T1R1+3 receptor responds to L-amino acids but not to D-enantiomers or other compounds. Most amino acids that are perceived as sweet activate T1R1+3, and this activation is strictly dependent on an intact T1R1+3 heterodimer. Multiple transcript variants enc…	223	128.941	0.5	Putative taste receptor. TAS1R1/TAS1R3 responds to the umami taste stimulus (the taste of monosodium glutamate). Sequence differences within and between species can significantly influence the selectivity and specificity of taste responses.
7679	Q86UE8	TLK2	Kinase	Tchem	Serine/threonine-protein kinase tousled-like 2		0.0708261	This gene encodes a nuclear serine/threonine kinase that was first identified in Arabidopsis. The encoded protein is thought to function in the regulation of chromatin assembly in the S phase of the cell cycle by regulating the levels of a histone H3/H4 chaperone. This protein is associated with double-strand break repair of DNA damage caused by radiation. Pseudogenes of this gene are present on …	299	21.0662	0.5	Serine/threonine-protein kinase involved in the process of chromatin assembly and probably also DNA replication, transcription, repair, and chromosome segregation. Phosphorylates the chromatin assembly factors ASF1A AND ASF1B. Phosphorylation of ASF1A prevents its proteasome-mediated degradation, thereby enhancing chromatin assembly. Negative regulator of amino acid starvation-induced autophagy.	5O0Y
7755	Q9NRH2	SNRK	Kinase	Tchem	SNF-related serine/threonine-protein kinase	Kinase	0.00707197	SNRK is a member of the sucrose nonfermenting (SNF)-related kinase family of serine/threonine kinases (Kertesz et al., 2002 [PubMed 12234663]).[supplied by OMIM, Apr 2009]	142	180.304	0.5	May play a role in hematopoietic cell proliferation or differentiation. Potential mediator of neuronal apoptosis.	5YKS
7796	Q13470	TNK1	Kinase	Tchem	Non-receptor tyrosine-protein kinase TNK1	Kinase	0.0662624	The protein encoded by this gene belongs to the tyrosine protein kinase family. Tyrosine protein kinases are important regulators of intracellular signal transduction pathways, mediating cellular proliferation, survival, and development. This gene is highly expressed in fetal tissues and at lower levels in few adult tissues, thus may function in signaling pathways utilized broadly during fetal de…	334	20.9754	1	Involved in negative regulation of cell growth. Has tumor suppressor properties. Plays a negative regulatory role in the Ras-MAPK pathway. May function in signaling pathways utilized broadly during fetal development and more selectively in adult tissues and in cells of the lymphohematopoietic system. Could specifically be involved in phospholipid signal transduction.
7799	Q15772	SPEG	Kinase	Tbio	Striated muscle preferentially expressed protein kinase	Kinase	0.0166638	This gene encodes a protein with similarity to members of the myosin light chain kinase family. This protein family is required for myocyte cytoskeletal development. Along with the desmin gene, expression of this gene may be controlled by the desmin locus control region. Mutations in this gene are associated with centronuclear myopathy 5. [provided by RefSeq, Jun 2016]	71	86.9755	1	Isoform 3 may have a role in regulating the growth and differentiation of arterial smooth muscle cells.	1U2H
7801	Q96KB5	PBK	Kinase	Tchem	Lymphokine-activated killer T-cell-originated protein kinase	Kinase	0.00278659	This gene encodes a serine/threonine protein kinase related to the dual specific mitogen-activated protein kinase kinase (MAPKK) family. Evidence suggests that mitotic phosphorylation is required for its catalytic activity. The encoded protein may be involved in the activation of lymphoid cells and support testicular functions, with a suggested role in the process of spermatogenesis. Overexpressi…	512	519.07	1	Phosphorylates MAP kinase p38. Seems to be active only in mitosis. May also play a role in the activation of lymphoid cells. When phosphorylated, forms a complex with TP53, leading to TP53 destabilization and attenuation of G2/M checkpoint during doxorubicin-induced DNA damage.	5J0A
7808	P57059	SIK1	Kinase	Tchem	Serine/threonine-protein kinase SIK1	Kinase	0.00523549	This gene encodes a serine/threonine protein kinase that contains a ubiquitin-associated (UBA) domain. The encoded protein is a member of the adenosine monophosphate-activated kinase (AMPK) subfamily of kinases that play a role in conserved signal transduction pathways. A mutation in this gene is associated with early infantile epileptic encephalopathy 30. [provided by RefSeq, Nov 2016]	269	287.383	0.125	Serine/threonine-protein kinase involved in various processes such as cell cycle regulation, gluconeogenesis and lipogenesis regulation, muscle growth and differentiation and tumor suppression. Phosphorylates HDAC4, HDAC5, PPME1, SREBF1, CRTC1/TORC1. Inhibits CREB activity by phosphorylating and inhibiting activity of TORCs, the CREB-specific coactivators, like CRTC2/TORC2 and CRTC3/TORC3 in resp…
7812	Q9H0K1	SIK2	Kinase	Tchem	Serine/threonine-protein kinase SIK2	Kinase	0.0195789		280	88.5196	0.083333	Phosphorylates 'Ser-794' of IRS1 in insulin-stimulated adipocytes, potentially modulating the efficiency of insulin signal transduction. Inhibits CREB activity by phosphorylating and repressing TORCs, the CREB-specific coactivators.
7824	Q9H6F2	TMEM38A	Ion Channel	Tbio	Trimeric intracellular cation channel type A	IC	0.108919		121	14.7772	1.5	Monovalent cation channel required for maintenance of rapid intracellular calcium release. May act as a potassium counter-ion channel that functions in synchronization with calcium release from intracellular stores.
7853	Q9UKE5	TNIK	Kinase	Tchem	TRAF2 and NCK-interacting protein kinase	Kinase	0.0268186	Wnt signaling plays important roles in carcinogenesis and embryonic development. The protein encoded by this gene is a serine/threonine kinase that functions as an activator of the Wnt signaling pathway. Mutations in this gene are associated with an autosomal recessive form of cognitive disability. Alternative splicing results in multiple transcript variants encoding different isoforms. [provided…	518	57.8398	0.333333	Serine/threonine kinase that acts as an essential activator of the Wnt signaling pathway. Recruited to promoters of Wnt target genes and required to activate their expression. May act by phosphorylating TCF4/TCF7L2. Appears to act upstream of the JUN N-terminal pathway. May play a role in the response to environmental stress. Part of a signaling complex composed of NEDD4, RAP2A and TNIK which reg…	2X7F,5AX9,5CWZ,5D7A
7855	Q9NYA1	SPHK1	Kinase	Tchem	Sphingosine kinase 1	Kinase	0.00147889	The protein encoded by this gene catalyzes the phosphorylation of sphingosine to form sphingosine-1-phosphate (S1P), a lipid mediator with both intra- and extracellular functions. Intracellularly, S1P regulates proliferation and survival, and extracellularly, it is a ligand for cell surface G protein-coupled receptors. This protein, and its product S1P, play a key role in TNF-alpha signaling and …	667	947.968	0.333333	Catalyzes the phosphorylation of sphingosine to form sphingosine 1-phosphate (SPP), a lipid mediator with both intra- and extracellular functions. Also acts on D-erythro-sphingosine and to a lesser extent sphinganine, but not other lipids, such as D,L-threo-dihydrosphingosine, N,N-dimethylsphingosine, diacylglycerol, ceramide, or phosphatidylinositol.	3VZB,3VZC,3VZD,4L02,4V24
8079	Q8TDI7	TMC2	Ion Channel	Tbio	Transmembrane channel-like protein 2	IC	0.0365556	This gene encodes a transmembrane protein that is necesssary for mechanotransduction in cochlear hair cells of the inner ear. Mutations in this gene may underlie hereditary disorders of balance and hearing. [provided by RefSeq, Aug 2015]	57	36.9719	0.5	Probable ion channel required for the normal function of cochlear hair cells (PubMed:11850618). Component of the hair cell's mechanotransduction (MET) machinery. Involved in mechanosensitive responses of the hair cells (By similarity).
8087	Q99835	SMO	GPCR	Tclin	Smoothened homolog	GPCR	0.0323585	The protein encoded by this gene is a G protein-coupled receptor that interacts with the patched protein, a receptor for hedgehog proteins. The encoded protein tranduces signals to other proteins after activation by a hedgehog protein/patched protein complex. [provided by RefSeq, Jul 2010]	536	64.7145	0.333333	G protein-coupled receptor that probably associates with the patched protein (PTCH) to transduce the hedgehog's proteins signal. Binding of sonic hedgehog (SHH) to its receptor patched is thought to prevent normal inhibition by patched of smoothened (SMO). Required for the accumulation of KIF7, GLI2 and GLI3 in the cilia (PubMed:19592253). Interacts with DLG5 at the ciliary base to induce the acc…	4JKV,4N4W,4O9R,4QIM,4QIN,5L7D,5L7I,5V56,5V57
8174	P21453	S1PR1	GPCR	Tclin	Sphingosine 1-phosphate receptor 1	GPCR	0.00162513	The protein encoded by this gene is structurally similar to G protein-coupled receptors and is highly expressed in endothelial cells. It binds the ligand sphingosine-1-phosphate with high affinity and high specificity, and suggested to be involved in the processes that regulate the differentiation of endothelial cells. Activation of this receptor induces cell-cell adhesion. Alternative splicing r…	697	794.675	1	G-protein coupled receptor for the bioactive lysosphingolipid sphingosine 1-phosphate (S1P) that seems to be coupled to the G(i) subclass of heteromeric G proteins. Signaling leads to the activation of RAC1, SRC, PTK2/FAK1 and MAP kinases. Plays an important role in cell migration, probably via its role in the reorganization of the actin cytoskeleton and the formation of lamellipodia in response …	3V2W,3V2Y
8177	Q99500	S1PR3	GPCR	Tclin	Sphingosine 1-phosphate receptor 3	GPCR	0.00408544	This gene encodes a member of the EDG family of receptors, which are G protein-coupled receptors. This protein has been identified as a functional receptor for sphingosine 1-phosphate and likely contributes to the regulation of angiogenesis and vascular endothelial cell function. [provided by RefSeq, Jul 2008]	511	277.161	0.25	Receptor for the lysosphingolipid sphingosine 1-phosphate (S1P). S1P is a bioactive lysophospholipid that elicits diverse physiological effect on most types of cells and tissues. When expressed in rat HTC4 hepatoma cells, is capable of mediating S1P-induced cell proliferation and suppression of apoptosis.
8212	P51168	SCNN1B	Ion Channel	Tclin	Amiloride-sensitive sodium channel subunit beta		0.0128128	Nonvoltage-gated, amiloride-sensitive, sodium channels control fluid and electrolyte transport across epithelia in many organs. These channels are heteromeric complexes consisting of 3 subunits: alpha, beta, and gamma. This gene encodes the beta subunit, and mutations in this gene have been associated with pseudohypoaldosteronism type 1 (PHA1), and Liddle syndrome. [provided by RefSeq, Apr 2009]	415	99.06	0.25	Sodium permeable non-voltage-sensitive ion channel inhibited by the diuretic amiloride. Mediates the electrodiffusion of the luminal sodium (and water, which follows osmotically) through the apical membrane of epithelial cells. Plays an essential role in electrolyte and blood pressure homeostasis, but also in airway surface liquid homeostasis, which is important for proper clearance of mucus. Con…
8214	Q01118	SCN7A	Ion Channel	Tclin	Sodium channel protein type 7 subunit alpha		0.0534382	This gene encodes one of the many voltage-gated sodium channel proteins. For proper functioning of neurons and muscles during action potentials, voltage-gated sodium channels direct sodium ion diffusion for membrane depolarization. This sodium channel protein has some atypical characteristics; the similarity between the human and mouse proteins is lower compared to other orthologous sodium channe…	118	21.0675	2	Mediates the voltage-dependent sodium ion permeability of excitable membranes. Assuming opened or closed conformations in response to the voltage difference across the membrane, the protein forms a sodium-selective channel through which Na(+) ions may pass in accordance with their electrochemical gradient.
8218	O60939	SCN2B	Ion Channel	Tbio	Sodium channel subunit beta-2		0.0377363	The protein encoded by this gene is the beta 2 subunit of the type II voltage-gated sodium channel. The encoded protein is involved in cell-cell adhesion and cell migration. Defects in this gene can be a cause of Brugada Syndrome, atrial fibrillation, or sudden infant death syndrome. [provided by RefSeq, Jul 2015]	253	26.8902	1	Crucial in the assembly, expression, and functional modulation of the heterotrimeric complex of the sodium channel. The subunit beta-2 causes an increase in the plasma membrane surface area and in its folding into microvilli. Interacts with TNR may play a crucial role in clustering and regulation of activity of sodium channels at nodes of Ranvier (By similarity).	5FDY,5FEB
8219	Q8IWB6	TEX14	Kinase	Tbio	Inactive serine/threonine-protein kinase TEX14	Kinase	0.0851592	The protein encoded by this gene is necessary for intercellular bridges in germ cells, which are required for spermatogenesis. Three transcript variants encoding different isoforms have been found for this gene.[provided by RefSeq, Jan 2011]	77	17.3248	0.5	Required both for the formation of intercellular bridges during meiosis and for kinetochore-microtubule attachment during mitosis. Intercellular bridges are evolutionarily conserved structures that connect differentiating germ cells and are required for spermatogenesis and male fertility. Acts by promoting the conversion of midbodies into intercellular bridges via its interaction with CEP55: inte…	3WUT,3WUU
8220	Q9NY72	SCN3B	Ion Channel	Tbio	Sodium channel subunit beta-3		0.0438123	Voltage-gated sodium channels are transmembrane glycoprotein complexes composed of a large alpha subunit and one or more regulatory beta subunits. They are responsible for the generation and propagation of action potentials in neurons and muscle. This gene encodes one member of the sodium channel beta subunit gene family, and influences the inactivation kinetics of the sodium channel. Two alterna…	110	25.147	0.333333	Modulates channel gating kinetics. Causes unique persistent sodium currents. Inactivates the sodium channel opening more slowly than the subunit beta-1. Its association with NFASC may target the sodium channels to the nodes of Ranvier of developing axons and retain these channels at the nodes in mature myelinated axons (By similarity).	4L1D
8255	Q9UI33	SCN11A	Ion Channel	Tclin	Sodium channel protein type 11 subunit alpha	IC	0.00145294	Voltage-gated sodium channels are transmembrane glycoprotein complexes composed of a large alpha subunit with 24 transmembrane domains and one or more regulatory beta subunits. They are responsible for the generation and propagation of action potentials in neurons and muscle. This gene encodes one member of the sodium channel alpha subunit gene family, and is highly expressed in nociceptive neuro…	100	987.944	0.333333	This protein mediates the voltage-dependent sodium ion permeability of excitable membranes. Assuming opened or closed conformations in response to the voltage difference across the membrane, the protein forms a sodium-selective channel through which sodium ions may pass in accordance with their electrochemical gradient. It is a tetrodotoxin-resistant sodium channel isoform. Also involved, with th…
8257	P47872	SCTR	GPCR	Tclin	Secretin receptor	GPCR	0.0116394	The protein encoded by this gene is a G protein-coupled receptor and belongs to the glucagon-VIP-secretin receptor family. It binds secretin which is the most potent regulator of pancreatic bicarbonate, electrolyte and volume secretion. Secretin and its receptor are suggested to be involved in pancreatic cancer and autism. [provided by RefSeq, Jul 2008]	251	97.9548	0.5	This is a receptor for secretin. The activity of this receptor is mediated by G proteins which activate adenylyl cyclase.
8315	Q07699	SCN1B	Ion Channel	Tbio	Sodium channel subunit beta-1	IC	0.00910273	Voltage-gated sodium channels are heteromeric proteins that function in the generation and propagation of action potentials in muscle and neuronal cells. They are composed of one alpha and two beta subunits, where the alpha subunit provides channel activity and the beta-1 subunit modulates the kinetics of channel inactivation. This gene encodes a sodium channel beta-1 subunit. Mutations in this g…	193	107.431	1	Crucial in the assembly, expression, and functional modulation of the heterotrimeric complex of the sodium channel. The subunit beta-1 can modulate multiple alpha subunit isoforms from brain, skeletal muscle, and heart. Its association with NFASC may target the sodium channels to the nodes of Ranvier of developing axons and retain these channels at the nodes in mature myelinated axons.	6AGF
8363	Q14524	SCN5A	Ion Channel	Tclin	Sodium channel protein type 5 subunit alpha	IC	0.00050944	The protein encoded by this gene is an integral membrane protein and tetrodotoxin-resistant voltage-gated sodium channel subunit. This protein is found primarily in cardiac muscle and is responsible for the initial upstroke of the action potential in an electrocardiogram. Defects in this gene are a cause of long QT syndrome type 3 (LQT3), an autosomal dominant cardiac disease. Alternative splicin…	295	2507.31	0.2	This protein mediates the voltage-dependent sodium ion permeability of excitable membranes. Assuming opened or closed conformations in response to the voltage difference across the membrane, the protein forms a sodium-selective channel through which Na(+) ions may pass in accordance with their electrochemical gradient (PubMed:1309946, PubMed:21447824, PubMed:25370050, PubMed:23420830, PubMed:2308…	2KBI,2L53,4DCK,4DJC,4JQ0,4OVN,5DBR
8364	Q9Y5Y9	SCN10A	Ion Channel	Tclin	Sodium channel protein type 10 subunit alpha	IC	0.00107685	The protein encoded by this gene is a tetrodotoxin-resistant voltage-gated sodium channel alpha subunit. The properties of the channel formed by the encoded transmembrane protein can be altered by interaction with different beta subunits. This protein may be involved in the onset of pain associated with peripheral neuropathy. Alternative splicing results in multiple transcript variants. [provided…	209	1200.61	0.5	Tetrodotoxin-resistant channel that mediates the voltage-dependent sodium ion permeability of excitable membranes. Assuming opened or closed conformations in response to the voltage difference across the membrane, the protein forms a sodium-selective channel through which sodium ions may pass in accordance with their electrochemical gradient. Plays a role in neuropathic pain mechanisms.
8369	Q9NY46	SCN3A	Ion Channel	Tclin	Sodium channel protein type 3 subunit alpha	IC	0.00646122	Voltage-gated sodium channels are transmembrane glycoprotein complexes composed of a large alpha subunit with 24 transmembrane domains and one or more regulatory beta subunits. They are responsible for the generation and propagation of action potentials in neurons and muscle. This gene encodes one member of the sodium channel alpha subunit gene family, and is found in a cluster of five alpha subu…	117	179.576	0.5	Mediates the voltage-dependent sodium ion permeability of excitable membranes. Assuming opened or closed conformations in response to the voltage difference across the membrane, forms a sodium-selective channel through which Na(+) ions may pass in accordance with their electrochemical gradient (PubMed:24157691, PubMed:28235671, PubMed:29466837). May contribute to the regulation of serotonin/5-hyd…
8372	Q6P3W7	SCYL2	Kinase	Tbio	SCY1-like protein 2		0.307947	The protein encoded by this gene associates with clathrin-coated complexes at the plasma membrane and with endocytic coated vesicles. The encoded protein phosphorylates the beta2 subunit of the plasma membrane adapter complex AP2 and interacts with clathrin, showing involvement in clathrin-dependent pathways between the trans-Golgi network and the endosomal system. In addition, this protein has a…	151	6.61773	1	Component of AP2-containing clathrin coated structures at the plasma membrane or of endocytic coated vesicles. According to PubMed:15809293, probable serine/threonine-protein kinase that phosphorylates, in vitro, the beta2-subunit of the plasma membrane adapter complex AP2 and other proteins in presence of poly-L-lysine. According to PubMed:16914521, has no detectable kinase activity in vitro. Ma…
8459	Q15858	SCN9A	Ion Channel	Tclin	Sodium channel protein type 9 subunit alpha	IC	0.00169067	This gene encodes a voltage-gated sodium channel which plays a significant role in nociception signaling. Mutations in this gene have been associated with primary erythermalgia, channelopathy-associated insensitivity to pain, and paroxysmal extreme pain disorder. [provided by RefSeq, Aug 2009]	452	865.135	1	Mediates the voltage-dependent sodium ion permeability of excitable membranes. Assuming opened or closed conformations in response to the voltage difference across the membrane, the protein forms a sodium-selective channel through which Na(+) ions may pass in accordance with their electrochemical gradient (PubMed:7720699, PubMed:17167479, PubMed:25240195, PubMed:26680203, PubMed:15385606, PubMed:…	5EK0
8479	P35499	SCN4A	Ion Channel	Tclin	Sodium channel protein type 4 subunit alpha	IC	0.00185911	Voltage-gated sodium channels are transmembrane glycoprotein complexes composed of a large alpha subunit with 24 transmembrane domains and one or more regulatory beta subunits. They are responsible for the generation and propagation of action potentials in neurons and muscle. This gene encodes one member of the sodium channel alpha subunit gene family. It is expressed in skeletal muscle, and muta…	72	618.518	5.5	This protein mediates the voltage-dependent sodium ion permeability of excitable membranes. Assuming opened or closed conformations in response to the voltage difference across the membrane, the protein forms a sodium-selective channel through which Na(+) ions may pass in accordance with their electrochemical gradient. This sodium channel may be present in both denervated and innervated skeletal …	6AGF
8481	P35498	SCN1A	Ion Channel	Tclin	Sodium channel protein type 1 subunit alpha	IC	0.00109424	Voltage-dependent sodium channels are heteromeric complexes that regulate sodium exchange between intracellular and extracellular spaces and are essential for the generation and propagation of action potentials in muscle cells and neurons. Each sodium channel is composed of a large pore-forming, glycosylated alpha subunit and two smaller beta subunits. This gene encodes a sodium channel alpha sub…	178	1155.1	0.25	Mediates the voltage-dependent sodium ion permeability of excitable membranes. Assuming opened or closed conformations in response to the voltage difference across the membrane, the protein forms a sodium-selective channel through which Na(+) ions may pass in accordance with their electrochemical gradient. Plays a key role in brain, probably by regulating the moment when neurotransmitters are rel…
8482	P51172	SCNN1D	Ion Channel	Tbio	Amiloride-sensitive sodium channel subunit delta		0.0619169		236	21.782	0.333333	Sodium permeable non-voltage-sensitive ion channel inhibited by the diuretic amiloride. Mediates the electrodiffusion of the luminal sodium (and water, which follows osmotically) through the apical membrane of epithelial cells. Controls the reabsorption of sodium in kidney, colon, lung and sweat glands. Also plays a role in taste perception.
8483	Q9UQD0	SCN8A	Ion Channel	Tclin	Sodium channel protein type 8 subunit alpha	IC	0.00203805	This gene encodes a member of the sodium channel alpha subunit gene family. The encoded protein forms the ion pore region of the voltage-gated sodium channel. This protein is essential for the rapid membrane depolarization that occurs during the formation of the action potential in excitable neurons. Mutations in this gene are associated with cognitive disability, pancerebellar atrophy and ataxia…	197	612.663	0.166667	Mediates the voltage-dependent sodium ion permeability of excitable membranes. Assuming opened or closed conformations in response to the voltage difference across the membrane, the protein forms a sodium-selective channel through which Na(+) ions may pass in accordance with their electrochemical gradient. In macrophages and melanoma cells, isoform 5 may participate in the control of podosome and…
8487	Q96KG9	SCYL1	Kinase	Tbio	N-terminal kinase-like protein		0.0377435	This gene encodes a transcriptional regulator belonging to the SCY1-like family of kinase-like proteins. The protein has a divergent N-terminal kinase domain that is thought to be catalytically inactive, and can bind specific DNA sequences through its C-terminal domain. It activates transcription of the telomerase reverse transcriptase and DNA polymerase beta genes. The protein has been localized…	147	32.1233	0.333333	Regulates COPI-mediated retrograde protein traffic at the interface between the Golgi apparatus and the endoplasmic reticulum (PubMed:18556652). Involved in the maintenance of the Golgi apparatus morphology (PubMed:26581903). Has no detectable kinase activity in vitro (PubMed:18556652).
8543	Q9UHD2	TBK1	Kinase	Tchem	Serine/threonine-protein kinase TBK1	Kinase	0.00194753	The NF-kappa-B (NFKB) complex of proteins is inhibited by I-kappa-B (IKB) proteins, which inactivate NFKB by trapping it in the cytoplasm. Phosphorylation of serine residues on the IKB proteins by IKB kinases marks them for destruction via the ubiquitination pathway, thereby allowing activation and nuclear translocation of the NFKB complex. The protein encoded by this gene is similar to IKB kinas…	571	762.152	0.5	Serine/threonine kinase that plays an essential role in regulating inflammatory responses to foreign agents. Following activation of toll-like receptors by viral or bacterial components, associates with TRAF3 and TANK and phosphorylates interferon regulatory factors (IRFs) IRF3 and IRF7 as well as DDX3X. This activity allows subsequent homodimerization and nuclear translocation of the IRFs leadin…	4EFO,4EUT,4EUU,4IM0,4IM2,4IM3,4IW0,4IWO,4IWP,4IWQ,5EOA,5EOF,5EP6,5W5V,6BNY,6BOD,6BOE
8547	Q8TEA7	TBCK	Kinase	Tbio	TBC domain-containing protein kinase-like protein		0.0856815	This gene encodes a protein that contains a protein kinase domain, a Rhodanase-like domain and the Tre-2/Bub2/Cdc16 (TBC) domain. The encoded protein is thought to play a role in actin organization, cell growth and cell proliferation by regulating the mammalian target of the rapamycin (mTOR) signaling pathway. This protein may also be involved in the transcriptional regulation of the components o…	122	15.6909	0.5	Involved in the modulation of mTOR signaling and expression of mTOR complex components (PubMed:27040691, PubMed:23977024). Involved in the regulation of cell proliferation and growth (PubMed:23977024, PubMed:24576458). Involved in the control of actin-cytoskeleton organization (PubMed:23977024).
8551	Q9NYW0	TAS2R10	GPCR	Tchem	Taste receptor type 2 member 10	taste	0.0756422	This gene product belongs to the family of candidate taste receptors that are members of the G-protein-coupled receptor superfamily. These proteins are specifically expressed in the taste receptor cells of the tongue and palate epithelia. They are organized in the genome in clusters and are genetically linked to loci that influence bitter perception in mice and humans. In functional expression st…	100	15.8679	0.333333	Gustducin-coupled strychnine receptor implicated in the perception of bitter compounds in the oral cavity and the gastrointestinal tract. Signals through PLCB2 and the calcium-regulated cation channel TRPM5.
8552	Q9NYV9	TAS2R13	GPCR	Tchem	Taste receptor type 2 member 13	taste	0.253943	This gene product belongs to the family of candidate taste receptors that are members of the G-protein-coupled receptor superfamily. These proteins are specifically expressed in the taste receptor cells of the tongue and palate epithelia. They are organized in the genome in clusters and are genetically linked to loci that influence bitter perception in mice and humans. In functional expression st…	126	3.88051	2	Receptor that may play a role in the perception of bitterness and is gustducin-linked. May play a role in sensing the chemical composition of the gastrointestinal content. The activity of this receptor may stimulate alpha gustducin, mediate PLC-beta-2 activation and lead to the gating of TRPM5.
8553	P59543	TAS2R20	GPCR	Tchem	Taste receptor type 2 member 20	taste	0.205756	This gene encodes a member of the taste receptor two family of class C G-protein coupled receptors. Receptors of this family have a short extracellular N-terminus, seven transmembrane helices, three extracellular loops and three intracellular loops, and an intracellular C-terminus. Members of this family are expressed in a subset of taste receptor cells, where they function in bitter taste recept…	79	4.29063	0.5	Receptor that may play a role in the perception of bitterness and is gustducin-linked. May play a role in sensing the chemical composition of the gastrointestinal content. The activity of this receptor may stimulate alpha gustducin, mediate PLC-beta-2 activation and lead to the gating of TRPM5 (By similarity).
8554	P59533	TAS2R38	GPCR	Tchem	Taste receptor type 2 member 38	GPCR	0.004625	This gene encodes a seven-transmembrane G protein-coupled receptor that controls the ability to taste glucosinolates, a family of bitter-tasting compounds found in plants of the Brassica sp. Synthetic compounds phenylthiocarbamide (PTC) and 6-n-propylthiouracil (PROP) have been identified as ligands for this receptor and have been used to test the genetic diversity of this gene. Although several …	113	278.413	2.5	Receptor that may play a role in the perception of bitterness and is gustducin-linked. May play a role in sensing the chemical composition of the gastrointestinal content. The activity of this receptor may stimulate alpha gustducin, mediate PLC-beta-2 activation and lead to the gating of TRPM5 (By similarity).
8555	P59534	TAS2R39	GPCR	Tchem	Taste receptor type 2 member 39	taste	0.138602	The protein encoded by this gene is a bitter taste receptor that detects green tea catechins, soy isoflavones, and theaflavins. The encoded protein is gustducin-linked and may activate alpha gustducin. This gene is intronless. [provided by RefSeq, Dec 2015]	45	10.2084	2	Receptor that may play a role in the perception of bitterness and is gustducin-linked. May play a role in sensing the chemical composition of the gastrointestinal content. The activity of this receptor may stimulate alpha gustducin, mediate PLC-beta-2 activation and lead to the gating of TRPM5 (By similarity).	2GFZ
8556	P59535	TAS2R40	GPCR	Tchem	Taste receptor type 2 member 40	taste	0.613325	This gene encodes a member of the bitter taste receptor family which belong to the G protein-coupled receptor superfamily and are predominantly expressed in taste receptor cells of the tongue and palate epithelia. This intronless taste receptor gene encodes a seven-transmembrane receptor protein, functioning as a bitter taste receptor. This gene is clustered together with eight other taste recept…	11	2.03601	1	Gustducin-coupled receptor implicated in the perception of bitter compounds in the oral cavity and the gastrointestinal tract. Signals through PLCB2 and the calcium-regulated cation channel TRPM5.
8557	P59536	TAS2R41	GPCR	Tchem	Taste receptor type 2 member 41	taste	0.562488	This gene encodes a member of the bitter taste receptor family which belong to the G protein-coupled receptor superfamily and are predominantly expressed in taste receptor cells of the tongue and palate epithelia. This intronless taste receptor gene encodes a seven-transmembrane receptor protein, functioning as a bitter taste receptor. This gene is clustered together with eight other taste recept…	87	2.34361	0.2	Receptor that may play a role in the perception of bitterness and is gustducin-linked. May play a role in sensing the chemical composition of the gastrointestinal content. The activity of this receptor may stimulate alpha gustducin, mediate PLC-beta-2 activation and lead to the gating of TRPM5 (By similarity).
8558	P59537	TAS2R43	GPCR	Tchem	Taste receptor type 2 member 43	taste	0.105812	TAS2R43 belongs to the large TAS2R receptor family. TAS2Rs are expressed on the surface of taste receptor cells and mediate the perception of bitterness through a G protein-coupled second messenger pathway (Conte et al., 2002 [PubMed 12584440]). For further information on TAS2Rs, see MIM 604791.[supplied by OMIM, Mar 2009]	62	12.3995	0.5	Gustducin-coupled receptor immplicated in the perception of bitter compounds in the oral cavity and the gastrointestinal tract. Signals through PLCB2 and the calcium-regulated cation channel TRPM5. Activated by the sulfonyl amide sweeteners saccharin and acesulfame K. In airway epithelial cells, binding of bitter compounds increases the intracellular calcium ion concentration and stimulates cilia…
8563	Q9NYW5	TAS2R4	GPCR	Tchem	Taste receptor type 2 member 4	taste	0.0293838	This gene encodes a member of a family of candidate taste receptors that are members of the G protein-coupled receptor superfamily and that are specifically expressed by taste receptor cells of the tongue and palate epithelia. These apparently intronless genes encode a 7-transmembrane receptor protein, functioning as a bitter taste receptor. This gene is clustered with another 3 candidate taste r…	31	38.7254	0.333333	Gustducin-coupled receptor for denatonium and N(6)-propyl-2-thiouracil implicated in the perception of bitter compounds in the oral cavity and the gastrointestinal tract. Signals through PLCB2 and the calcium-regulated cation channel TRPM5. In airway epithelial cells, binding of denatonium increases the intracellular calcium ion concentration and stimulates ciliary beat frequency.
8564	Q9NYW7	TAS2R1	GPCR	Tchem	Taste receptor type 2 member 1	taste	0.0467691	This gene encodes a member of a family of candidate taste receptors that are members of the G protein-coupled receptor superfamily and that are specifically expressed by taste receptor cells of the tongue and palate epithelia. This intronless taste receptor gene encodes a 7-transmembrane receptor protein, functioning as a bitter taste receptor. This gene is mapped to chromosome 5p15, the location…	117	30.4525	0.45	Receptor that may play a role in the perception of bitterness and is gustducin-linked. May play a role in sensing the chemical composition of the gastrointestinal content. The activity of this receptor may stimulate alpha gustducin, mediate PLC-beta-2 activation and lead to the gating of TRPM5.
8565	Q9NYW2	TAS2R8	GPCR	Tchem	Taste receptor type 2 member 8	taste	0.180599	This gene product belongs to the family of candidate taste receptors that are members of the G-protein-coupled receptor superfamily. These proteins are specifically expressed in the taste receptor cells of the tongue and palate epithelia. They are organized in the genome in clusters and are genetically linked to loci that influence bitter perception in mice and humans. In functional expression st…	36	6.33736	0.2	Receptor that may play a role in the perception of bitterness and is gustducin-linked. May play a role in sensing the chemical composition of the gastrointestinal content. The activity of this receptor may stimulate alpha gustducin, mediate PLC-beta-2 activation and lead to the gating of TRPM5.
8566	Q96RJ0	TAAR1	GPCR	Tclin	Trace amine-associated receptor 1	GPCR	0.0018424	The protein encoded by this gene is a G-protein coupled receptor activated by trace amines. The encoded protein responds little or not at all to dopamine, serotonin, epinephrine, or histamine, but responds well to beta-phenylethylamine, p-tyramine, octopamine, and tryptamine. While primarily functioning in neurologic systems, there is evidence that this gene is involved in blood cell and immunolo…	162	791.321	1	Receptor for trace amines, including beta-phenylethylamine (b-PEA), p-tyramine (p-TYR), octopamine and tryptamine, with highest affinity for b-PEA and p-TYR. Unresponsive to classical biogenic amines, such as epinephrine and histamine and only partially activated by dopamine and serotonin. Trace amines are biogenic amines present in very low levels in mammalian tissues. Although some trace amines…
8567	O14804	TAAR5	GPCR	Tbio	Trace amine-associated receptor 5	GPCR	0.0526481		210	28.8991	0.333333	Olfactory receptor specific for trimethylamine, a trace amine. Also activated at lower level by dimethylethylamine. Trimethylamine is a bacterial metabolite found in some animal odors, and to humans it is a repulsive odor associated with bad breath and spoiled food. This receptor is probably mediated by the G(s)-class of G-proteins which activate adenylate cyclase.
8568	Q969N4	TAAR8	GPCR	Tbio	Trace amine-associated receptor 8	group A	0.00862757	This gene is part of the trace amine receptor cluster on chromosome 6 and encodes an orphan G-protein coupled receptor. Upregulated expression of this gene in astroglial cells upon exposure to lipopolysaccharides suggests a function for the encoded protein in the brain. [provided by RefSeq, Jul 2016]	118	175.863	1	Orphan receptor. Could be a receptor for trace amines. Trace amines are biogenic amines present in very low levels in mammalian tissues. Although some trace amines have clearly defined roles as neurotransmitters in invertebrates, the extent to which they function as true neurotransmitters in vertebrates has remained speculative. Trace amines are likely to be involved in a variety of physiological…
8569	Q96RI9	TAAR9	GPCR	Tbio	Trace amine-associated receptor 9	group A	0.0059924	TAAR9 is a member of a large family of rhodopsin G protein-coupled receptors (GPCRs, or GPRs). GPCRs contain 7 transmembrane domains and transduce extracellular signals through heterotrimeric G proteins.[supplied by OMIM, Jul 2005]	117	220.875	1	Orphan receptor. Could be a receptor for trace amines. Trace amines are biogenic amines present in very low levels in mammalian tissues. Although some trace amines have clearly defined roles as neurotransmitters in invertebrates, the extent to which they function as true neurotransmitters in vertebrates has remained speculative. Trace amines are likely to be involved in a variety of physiological…
8578	P21675	TAF1	Kinase	Tchem	Transcription initiation factor TFIID subunit 1	Kinase	0.00555929	Initiation of transcription by RNA polymerase II requires the activities of more than 70 polypeptides. The protein that coordinates these activities is the basal transcription factor TFIID, which binds to the core promoter to position the polymerase properly, serves as the scaffold for assembly of the remainder of the transcription complex, and acts as a channel for regulatory signals. TFIID is c…	268	208.059	1	Largest component and core scaffold of the TFIID basal transcription factor complex (PubMed:25412659, PubMed:27007846). Contains novel N- and C-terminal Ser/Thr kinase domains which can autophosphorylate or transphosphorylate other transcription factors. Phosphorylates TP53 on 'Thr-55' which leads to MDM2-mediated degradation of TP53. Phosphorylates GTF2A1 and GTF2F1 on Ser residues. Possesses DN…	1EQF,3AAD,3UV4,3UV5,4RGW,4YYM,4YYN,5FUR,5I1Q,5I29,5MG2,6FIC
8707	P59540	TAS2R46	GPCR	Tchem	Taste receptor type 2 member 46	taste	0.0786246	TAS2R46 belongs to the large TAS2R receptor family. TAS2Rs are expressed on the surface of taste receptor cells and mediate the perception of bitterness through a G protein-coupled second messenger pathway (Conte et al., 2002 [PubMed 12584440]). For further information on TAS2Rs, see MIM 604791.[supplied by OMIM, Sep 2009]	12	14.6932	1	Receptor that may play a role in the perception of bitterness and is gustducin-linked. May play a role in sensing the chemical composition of the gastrointestinal content. The activity of this receptor may stimulate alpha gustducin, mediate PLC-beta-2 activation and lead to the gating of TRPM5 (By similarity). In airway epithelial cells, binding of bitter compounds increases the intracellular cal…
8708	P59544	TAS2R50	GPCR	Tchem	Taste receptor type 2 member 50	taste	0.157471	TAS2R50 belongs to the large TAS2R receptor family. TAS2Rs are expressed on the surface of taste receptor cells and mediate the perception of bitterness through a G protein-coupled second messenger pathway (Conte et al., 2002 [PubMed 12584440]). See also TAS2R10 (MIM 604791).[supplied by OMIM, Mar 2008]	38	6.31156	0.333333	Receptor that may play a role in the perception of bitterness and is gustducin-linked. May play a role in sensing the chemical composition of the gastrointestinal content. The activity of this receptor may stimulate alpha gustducin, mediate PLC-beta-2 activation and lead to the gating of TRPM5 (By similarity).
8717	Q9NYW3	TAS2R7	GPCR	Tchem	Taste receptor type 2 member 7	taste	0.100291	This gene product belongs to the family of candidate taste receptors that are members of the G-protein-coupled receptor superfamily. These proteins are specifically expressed in the taste receptor cells of the tongue and palate epithelia. They are organized in the genome in clusters and are genetically linked to loci that influence bitter perception in mice and humans. In functional expression st…	120	13.4657	1.2	Gustducin-coupled receptor implicated in the perception of bitter compounds in the oral cavity and the gastrointestinal tract. Signals through PLCB2 and the calcium-regulated cation channel TRPM5.
8718	Q9P1P5	TAAR2	GPCR	Tbio	Trace amine-associated receptor 2	group A	0.0327187		94	37.6729	0.333333	Orphan receptor.
8719	Q9P1P4	TAAR3P	GPCR	Tdark	Putative trace amine-associated receptor 3	group A			0	0	0.2
8721	Q96RI8	TAAR6	GPCR	Tbio	Trace amine-associated receptor 6	GPCR	0.00594707	This gene encodes a seven-transmembrane G-protein-coupled receptor that likely functions as a receptor for endogenous trace amines. Mutations in this gene may be associated with schizophrenia.[provided by RefSeq, Feb 2010]	87	217.876	0.333333	Orphan receptor. Could be a receptor for trace amines. Trace amines are biogenic amines present in very low levels in mammalian tissues. Although some trace amines have clearly defined roles as neurotransmitters in invertebrates, the extent to which they function as true neurotransmitters in vertebrates has remained speculative. Trace amines are likely to be involved in a variety of physiological…
8723	Q15750	TAB1	Kinase	Tchem	TGF-beta-activated kinase 1 and MAP3K7-binding protein 1	Kinase	0.00721424	The protein encoded by this gene was identified as a regulator of the MAP kinase kinase kinase MAP3K7/TAK1, which is known to mediate various intracellular signaling pathways, such as those induced by TGF beta, interleukin 1, and WNT-1. This protein interacts and thus activates TAK1 kinase. It has been shown that the C-terminal portion of this protein is sufficient for binding and activation of T…	573	158.376	0.2	May be an important signaling intermediate between TGFB receptors and MAP3K7/TAK1. May play an important role in mammalian embryogenesis.	2J4O,2POM,2POP,2YDS,2YIY,4AY5,4AY6,4GS6,4KA3,4L3P,4L52,4L53,4O91,5DIY,5E7R,5GJD,5GJF,5GJG,5J7S,5J8I,5J9L,5JGA,5JGB,5JGD,5JH6,5JK3,5NZZ,5O90,5V5N,5VVU
8753	Q7L7X3	TAOK1	Kinase	Tchem	Serine/threonine-protein kinase TAO1		0.0171429		342	72.9368	0.5	Serine/threonine-protein kinase involved in various processes such as p38/MAPK14 stress-activated MAPK cascade, DNA damage response and regulation of cytoskeleton stability. Phosphorylates MAP2K3, MAP2K6 and MARK2. Acts as an activator of the p38/MAPK14 stress-activated MAPK cascade by mediating phosphorylation and subsequent activation of the upstream MAP2K3 and MAP2K6 kinases. Involved in G-pro…
8797	P42680	TEC	Kinase	Tchem	Tyrosine-protein kinase Tec	Kinase	0.106781	The protein encoded by this gene belongs to the Tec family of non-receptor protein-tyrosine kinases containing a pleckstrin homology domain. Tec family kinases are involved in the intracellular signaling mechanisms of cytokine receptors, lymphocyte surface antigens, heterotrimeric G-protein coupled receptors, and integrin molecules. They are also key players in the regulation of the immune functi…	321	10.0663	0.333333	Non-receptor tyrosine kinase that contributes to signaling from many receptors and participates as a signal transducer in multiple downstream pathways, including regulation of the actin cytoskeleton. Plays a redundant role to ITK in regulation of the adaptive immune response. Regulates the development, function and differentiation of conventional T-cells and nonconventional NKT-cells. Required fo…	2LUL
8837	P41587	VIPR2	GPCR	Tchem	Vasoactive intestinal polypeptide receptor 2	GPCR	0.00463802	This gene encodes a receptor for vasoactive intestinal peptide, a small neuropeptide. Vasoactive intestinal peptide is involved in smooth muscle relaxation, exocrine and endocrine secretion, and water and ion flux in lung and intestinal epithelia. Its actions are effected through integral membrane receptors associated with a guanine nucleotide binding protein which activates adenylate cyclase. [p…	307	219.423	0.533333	This is a receptor for VIP as well as PACAP-38 and -27, the activity of this receptor is mediated by G proteins which activate adenylyl cyclase. Can be coupled to phospholipase C.	2X57
8851	Q15569	TESK1	Kinase	Tbio	Dual specificity testis-specific protein kinase 1		0.0676948	This gene product is a serine/threonine protein kinase that contains an N-terminal protein kinase domain and a C-terminal proline-rich domain. Its protein kinase domain is most closely related to those of the LIM motif-containing protein kinases (LIMKs). The encoded protein can phosphorylate myelin basic protein and histone in vitro. The testicular germ cell-specific expression and developmental …	144	16.7326	0.5	Dual specificity protein kinase activity catalyzing autophosphorylation and phosphorylation of exogenous substrates on both serine/threonine and tyrosine residues. Probably plays a central role at and after the meiotic phase of spermatogenesis (By similarity).
8912	Q9UL54	TAOK2	Kinase	Tchem	Serine/threonine-protein kinase TAO2		0.0232708	This gene encodes a serine/threonine protein kinase that is involved in many different processes, including, cell signaling, microtubule organization and stability, and apoptosis. Alternatively spliced transcript variants encoding different isoforms have been described for this gene. [provided by RefSeq, Oct 2011]	201	62.192	0.090909	Serine/threonine-protein kinase involved in different processes such as membrane blebbing and apoptotic bodies formation DNA damage response and MAPK14/p38 MAPK stress-activated MAPK cascade. Phosphorylates itself, MBP, activated MAPK8, MAP2K3, MAP2K6 and tubulins. Activates the MAPK14/p38 MAPK signaling pathway through the specific activation and phosphorylation of the upstream MAP2K3 and MAP2K6…
8914	Q9H2K8	TAOK3	Kinase	Tchem	Serine/threonine-protein kinase TAO3	Kinase	0.0206582	The protein encoded by this gene is a serine/threonine protein kinase that activates the p38/MAPK14 stress-activated MAPK cascade but inhibits the basal activity of the MAPK8/JNK cascade. The encoded protein is a member of the GCK subfamily of STE20-like kinases. [provided by RefSeq, Oct 2016]	358	71.7379	1	Serine/threonine-protein kinase that acts as a regulator of the p38/MAPK14 stress-activated MAPK cascade and of the MAPK8/JNK cascade. Acts as an activator of the p38/MAPK14 stress-activated MAPK cascade. In response to DNA damage, involved in the G2/M transition DNA damage checkpoint by activating the p38/MAPK14 stress-activated MAPK cascade, probably by mediating phosphorylation of upstream MAP…
8932	P36897	TGFBR1	Kinase	Tchem	TGF-beta receptor type-1	Kinase	0.00081645	The protein encoded by this gene forms a heteromeric complex with type II TGF-beta receptors when bound to TGF-beta, transducing the TGF-beta signal from the cell surface to the cytoplasm. The encoded protein is a serine/threonine protein kinase. Mutations in this gene have been associated with Loeys-Dietz aortic aneurysm syndrome (LDAS). Multiple transcript variants encoding different isoforms h…	551	1387.93	1	Transmembrane serine/threonine kinase forming with the TGF-beta type II serine/threonine kinase receptor, TGFBR2, the non-promiscuous receptor for the TGF-beta cytokines TGFB1, TGFB2 and TGFB3. Transduces the TGFB1, TGFB2 and TGFB3 signal from the cell surface to the cytoplasm and is thus regulating a plethora of physiological and pathological processes including cell cycle arrest in epithelial a…	1B6C,1IAS,1PY5,1RW8,1TBI,1VJY,2L5S,2PJY,2WOT,2WOU,2X7O,3FAA,3GXL,3HMM,3KCF,3KFD,3TZM,4X0M,4X2F,4X2G,4X2J,4X2K,4X2N,5E8S,5E8T,5E8U,5E8W,5E8X,5E8Z,5E90,5FRI,5USQ,6B8Y
8933	P37173	TGFBR2	Kinase	Tchem	TGF-beta receptor type-2	Kinase	0.00085381	The protein encoded by this gene is a transmembrane protein that has a protein kinase domain, forms a heterodimeric complex with TGF-beta receptor type-1, and binds TGF-beta. This receptor/ligand complex phosphorylates proteins, which then enter the nucleus and regulate the transcription of genes related to cell proliferation, cell cycle arrest, wound healing, immunosuppression, and tumorigenesis…	734	1284.22	1	Transmembrane serine/threonine kinase forming with the TGF-beta type I serine/threonine kinase receptor, TGFBR1, the non-promiscuous receptor for the TGF-beta cytokines TGFB1, TGFB2 and TGFB3. Transduces the TGFB1, TGFB2 and TGFB3 signal from the cell surface to the cytoplasm and is thus regulating a plethora of physiological and pathological processes including cell cycle arrest in epithelial an…	1KTZ,1M9Z,1PLO,2PJY,3KFD,4P7U,4XJJ,5E8V,5E8Y,5E91,5E92,5TX4,5TY4
8941	P32241	VIPR1	GPCR	Tchem	Vasoactive intestinal polypeptide receptor 1	GPCR	0.0016529	This gene encodes a receptor for vasoactive intestinal peptide, a small neuropeptide. Vasoactive intestinal peptide is involved in smooth muscle relaxation, exocrine and endocrine secretion, and water and ion flux in lung and intestinal epithelia. Its actions are effected through integral membrane receptors associated with a guanine nucleotide binding protein which activates adenylate cyclase. Se…	423	655.051	1	This is a receptor for VIP. The activity of this receptor is mediated by G proteins which activate adenylyl cyclase. The affinity is VIP = PACAP-27 > PACAP-38.	1OF2,1OGT,3B3I,3B6S,3DTX,3HCV,5DEF,5DEG,5IB1,5IB2,5IB3,5IB4,5IB5
9052	O75762	TRPA1	Ion Channel	Tclin	Transient receptor potential cation channel subfamily A member 1	IC	0.00093648	The structure of the protein encoded by this gene is highly related to both the protein ankyrin and transmembrane proteins. The specific function of this protein has not yet been determined; however, studies indicate the function may involve a role in signal transduction and growth control. [provided by RefSeq, Jul 2008]	252	1575.8	1	Receptor-activated non-selective cation channel involved in detection of pain and possibly also in cold perception and inner ear function (PubMed:25389312, PubMed:25855297). Has a central role in the pain response to endogenous inflammatory mediators and to a diverse array of volatile irritants, such as mustard oil, cinnamaldehyde, garlic and acrolein, an irritant from tears gas and vehicule exha…	3J9P
9056	Q9UKI8	TLK1	Kinase	Tchem	Serine/threonine-protein kinase tousled-like 1		0.0342719	The protein encoded by this gene is a serine/threonine kinase that may be involved in the regulation of chromatin assembly. The encoded protein is only active when it is phosphorylated, and this phosphorylation is cell cycle-dependent, with the maximal activity of this protein coming during S phase. The catalytic activity of this protein is diminished by DNA damage and by blockage of DNA replicat…	359	37.8551	0.111111	Rapidly and transiently inhibited by phosphorylation following the generation of DNA double-stranded breaks during S-phase. This is cell cycle checkpoint and ATM-pathway dependent and appears to regulate processes involved in chromatin assembly. Isoform 3 phosphorylates and enhances the stability of the t-SNARE SNAP23, augmenting its assembly with syntaxin. Isoform 3 protects the cells from the i…
9083	Q9ULQ1	TPCN1	Ion Channel	Tchem	Two pore calcium channel protein 1	IC	0.003844	Voltage-gated Ca(2+) and Na+ channels have 4 homologous domains, each containing 6 transmembrane segments, S1 to S6. TPCN1 is similar to these channels, but it has only 2 domains containing S1 to S6 (Ishibashi et al., 2000 [PubMed 10753632]).[supplied by OMIM, Mar 2008]	51	323.902	1	Nicotinic acid adenine dinucleotide phosphate (NAADP) receptor that may function as one of the major voltage-gated Ca(2+) channels (VDCC) across the lysosomal and endosomal membrane.
9089	Q02763	TEK	Kinase	Tclin	Angiopoietin-1 receptor	Kinase	0.00079268	This gene encodes a receptor that belongs to the protein tyrosine kinase Tie2 family. The encoded protein possesses a unique extracellular region that contains two immunoglobulin-like domains, three epidermal growth factor (EGF)-like domains and three fibronectin type III repeats. The ligand angiopoietin-1 binds to this receptor and mediates a signaling pathway that functions in embryonic vascula…	1276	1302.94	0.333333	Tyrosine-protein kinase that acts as cell-surface receptor for ANGPT1, ANGPT2 and ANGPT4 and regulates angiogenesis, endothelial cell survival, proliferation, migration, adhesion and cell spreading, reorganization of the actin cytoskeleton, but also maintenance of vascular quiescence. Has anti-inflammatory effects by preventing the leakage of proinflammatory plasma proteins and leukocytes from bl…	1FVR,2GY5,2GY7,2OO8,2OSC,2P4I,2WQB,3BEA,3L8P,4K0V,4X3J,5MYA,5MYB,5UTK
9231	Q7Z402	TMC7	Ion Channel	Tdark	Transmembrane channel-like protein 7		0.367692		49	6.04209	0.5	Probable ion channel.
9232	Q8IU68	TMC8	Ion Channel	Tbio	Transmembrane channel-like protein 8	IC	0.0263125	Epidermodysplasia verruciformis (EV) is an autosomal recessive dermatosis characterized by abnormal susceptibility to human papillomaviruses (HPVs) and a high rate of progression to squamous cell carcinoma on sun-exposed skin. EV is caused by mutations in either of two adjacent genes located on chromosome 17q25.3. Both of these genes encode integral membrane proteins that localize to the endoplas…	181	62.9046	0.25	Probable ion channel.
9266	Q7Z403	TMC6	Ion Channel	Tbio	Transmembrane channel-like protein 6	IC	0.00761789	Epidermodysplasia verruciformis (EV) is an autosomal recessive dermatosis characterized by abnormal susceptibility to human papillomaviruses (HPVs) and a high rate of progression to squamous cell carcinoma on sun-exposed skin. EV is caused by mutations in either of two adjacent genes located on chromosome 17q25.3. Both of these genes encode integral membrane proteins that localize to the endoplas…	131	491.631	1	Probable ion channel.
9462	Q9NVV0	TMEM38B	Ion Channel	Tbio	Trimeric intracellular cation channel type B		0.0691148	This gene encodes an intracellular monovalent cation channel that functions in maintenance of intracellular calcium release. Mutations in this gene may be associated with autosomal recessive osteogenesis. [provided by RefSeq, Oct 2012]	91	15.6693	1	Monovalent cation channel required for maintenance of rapid intracellular calcium release. May act as a potassium counter-ion channel that functions in synchronization with calcium release from intracellular stores.
9485	Q9H5K3	POMK	Kinase	Tbio	Protein O-mannose kinase		0.0934034	This gene encodes a protein that may be involved in the presentation of the laminin-binding O-linked carbohydrate chain of alpha-dystroglycan (a-DG), which forms transmembrane linkages between the extracellular matrix and the exoskeleton. Some pathogens use this O-linked carbohydrate unit for host entry. Loss of function compound heterozygous mutations in this gene were found in a human patient a…	208	13.142	0.25	Protein O-mannose kinase that specifically mediates phosphorylation at the 6-position of an O-mannose of the trisaccharide (N-acetylgalactosamine (GalNAc)-beta-1,3-N-acetylglucosamine (GlcNAc)-beta-1,4-mannose) to generate phosphorylated O-mannosyl trisaccharide (N-acetylgalactosamine-beta-1,3-N-acetylglucosamine-beta-1,4-(phosphate-6-)mannose). Phosphorylated O-mannosyl trisaccharide is a carboh…
9490	Q96LW2	RSKR	Kinase	Tdark	Ribosomal protein S6 kinase-related protein		1.64953		0	0.59903
9501	Q9Y2K2	SIK3	Kinase	Tchem	Serine/threonine-protein kinase SIK3	Kinase	0.0293666		0	53.9009	0.083333	Inhibits CREB activity by phosphorylating and inhibiting activity of TORCs, the CREB-specific coactivators, like CRTC2/TORC2 and CRTC3/TORC3 in response to cAMP signaling.
9526	Q9UHJ6	SHPK	Kinase	Tbio	Sedoheptulokinase	Kinase	0.161669	The protein encoded by this gene has weak homology to several carbohydrate kinases, a class of proteins involved in the phosphorylation of sugars as they enter a cell, inhibiting return across the cell membrane. Sequence variation between this novel gene and known carbohydrate kinases suggests the possibility of a different substrate, cofactor or changes in kinetic properties distinguishing it fr…	179	8.23587	0.5	Acts as a modulator of macrophage activation through control of glucose metabolism.
9579	Q9H2G2	SLK	Kinase	Tchem	STE20-like serine/threonine-protein kinase	Kinase	0.00310721		243	364.49	1	Mediates apoptosis and actin stress fiber dissolution.	2J51,2JFL,2JFM,2UV2,4USF,6HVD
9583	Q6UXY8	TMC5	Ion Channel	Tbio	Transmembrane channel-like protein 5		0.21047		68	8.24604	0.333333	Probable ion channel.
9589	Q96Q15	SMG1	Kinase	Tchem	Serine/threonine-protein kinase SMG1	Kinase	0.00854339	This gene encodes a protein involved in nonsense-mediated mRNA decay (NMD) as part of the mRNA surveillance complex. The protein has kinase activity and is thought to function in NMD by phosphorylating the regulator of nonsense transcripts 1 protein. Alternatively spliced transcript variants have been described, but their full-length nature has yet to be determined. [provided by RefSeq, Mar 2013]	197	130.119	0.2	Serine/threonine protein kinase involved in both mRNA surveillance and genotoxic stress response pathways. Recognizes the substrate consensus sequence [ST]-Q. Plays a central role in nonsense-mediated decay (NMD) of mRNAs containing premature stop codons by phosphorylating UPF1/RENT1. Recruited by release factors to stalled ribosomes together with SMG8 and SMG9 (forming the SMG1C protein kinase c…
9598	P16473	TSHR	GPCR	Tclin	Thyrotropin receptor	GPCR	0.00074972	The protein encoded by this gene is a membrane protein and a major controller of thyroid cell metabolism. The encoded protein is a receptor for thyrothropin and thyrostimulin, and its activity is mediated by adenylate cyclase. Defects in this gene are a cause of several types of hyperthyroidism. Three transcript variants encoding different isoforms have been found for this gene. [provided by RefS…	1081	1625.39	0.333333	Receptor for the thyroid-stimulating hormone (TSH) or thyrotropin (PubMed:11847099, PubMed:12045258). Also acts as a receptor for the heterodimeric glycoprotein hormone (GPHA2:GPHB5) or thyrostimulin (PubMed:12045258). The activity of this receptor is mediated by G proteins which activate adenylate cyclase (PubMed:11847099). Plays a central role in controlling thyroid cell metabolism (By similari…	1XUM,2XWT,3G04
9611	Q96PF2	TSSK2	Kinase	Tchem	Testis-specific serine/threonine-protein kinase 2		2.12485	TSSK2 belongs to a family of serine/threonine kinases highly expressed in testis (Hao et al., 2004 [PubMed 15044604]).[supplied by OMIM, Mar 2008]	67	0.453556	0.5	Testis-specific serine/threonine-protein kinase required during spermatid development. Phosphorylates TSKS at 'Ser-288' and SPAG16. Involved in the late stages of spermatogenesis, during the reconstruction of the cytoplasm. During spermatogenesis, required for the transformation of a ring-shaped structure around the base of the flagellum originating from the chromatoid body.
9613	Q6IQ55	TTBK2	Kinase	Tbio	Tau-tubulin kinase 2		0.0326229	This gene encodes a serine-threonine kinase that putatively phosphorylates tau and tubulin proteins. Mutations in this gene cause spinocerebellar ataxia type 11 (SCA11); a neurodegenerative disease characterized by progressive ataxia and atrophy of the cerebellum and brainstem. [provided by RefSeq, Aug 2009]	201	43.7105	1	Serine/threonine kinase that acts as a key regulator of ciliogenesis: controls the initiation of ciliogenesis by binding to the distal end of the basal body and promoting the removal of CCP110, which caps the mother centriole, leading to the recruitment of IFT proteins, which build the ciliary axoneme. Has some substrate preference for proteins that are already phosphorylated on a Tyr residue at …
9629	P33981	TTK	Kinase	Tchem	Dual specificity protein kinase TTK	Kinase	0.00447957	This gene encodes a dual specificity protein kinase with the ability to phosphorylate tyrosine, serine and threonine. Associated with cell proliferation, this protein is essential for chromosome alignment at the centromere during mitosis and is required for centrosome duplication. It has been found to be a critical mitotic checkpoint protein for accurate segregation of chromosomes during mitosis.…	422	272.049	0.333333	Phosphorylates proteins on serine, threonine, and tyrosine. Probably associated with cell proliferation. Essential for chromosome alignment by enhancing AURKB activity (via direct CDCA8 phosphorylation) at the centromere, and for the mitotic checkpoint.	2X9E,2ZMC,2ZMD,3CEK,3DBQ,3GFW,3H9F,3HMN,3HMO,3HMP,3VQU,3W1F,3WYX,3WYY,3WZJ,3WZK,4B94,4BHZ,4BI0,4BI1,4BI2,4C4E,4C4F,4C4G,4C4H,4C4I,4C4J,4CV8,4CV9,4CVA,4D2S,4H7X,4H7Y,4JS8,4JT3,4O6L,4ZEG,5AP0,5AP1,5AP2,5AP3,5AP4,5AP5,5AP6,5AP7,5EH0,5EHL,5EHO,5EHY,5EI2,5EI6,5EI8,5LJJ,5MRB,5N7V,5N84,5N87,5N93,5N9S,5NA0,5NAD,5NTT,5O91,6B4W,6H3K
9634	Q9H313	TTYH1	Ion Channel	Tbio	Protein tweety homolog 1		0.0669885	This gene encodes a member of the tweety family of proteins. Members of this family function as chloride anion channels. The encoded protein functions as a calcium(2+)-independent, volume-sensitive large conductance chloride(-) channel. Three transcript variants encoding distinct isoforms have been identified for this gene. [provided by RefSeq, Jan 2011]	155	19.5589	0.666667	Probable chloride channel. May be involved in cell adhesion (By similarity).
9671	Q9H3S4	TPK1	Kinase	Tbio	Thiamin pyrophosphokinase 1	Kinase	0.00899463	The protein encoded by this gene functions as a homodimer and catalyzes the conversion of thiamine to thiamine pyrophosphate, a cofactor for some enzymes of the glycolytic and energy production pathways. Defects in this gene are a cause of thiamine metabolism dysfunction syndrome-5. [provided by RefSeq, Apr 2017]	164	173.576	1	Catalyzes the phosphorylation of thiamine to thiamine pyrophosphate. Can also catalyze the phosphorylation of pyrithiamine to pyrithiamine pyrophosphate.	1OLY,3S4Y
9681	Q9C0H2	TTYH3	Ion Channel	Tbio	Protein tweety homolog 3	IC	0.217472	This gene encodes a member of the tweety family of proteins. Members of this family function as chloride anion channels. The encoded protein functions as a calcium(2+)-activated large conductance chloride(-) channel. [provided by RefSeq, Jul 2008]	23	9.17423	0.25	Probable large-conductance Ca(2+)-activated chloride channel. May play a role in Ca(2+) signal transduction.
9705	Q9Y5S1	TRPV2	Ion Channel	Tchem	Transient receptor potential cation channel subfamily V member 2	IC	0.00472952	This gene encodes an ion channel that is activated by high temperatures above 52 degrees Celsius. The protein may be involved in transduction of high-temperature heat responses in sensory ganglia. It is thought that in other tissues the channel may be activated by stimuli other than heat. [provided by RefSeq, Jul 2008]	283	277.74	0.5	Calcium-permeable, non-selective cation channel with an outward rectification. Seems to be regulated, at least in part, by IGF-I, PDGF and neuropeptide head activator. May transduce physical stimuli in mast cells. Activated by temperatures higher than 52 degrees Celsius; is not activated by vanilloids and acidic pH.	2F37
9706	Q9HBA0	TRPV4	Ion Channel	Tchem	Transient receptor potential cation channel subfamily V member 4	IC	0.00111193	This gene encodes a member of the OSM9-like transient receptor potential channel (OTRPC) subfamily in the transient receptor potential (TRP) superfamily of ion channels. The encoded protein is a Ca2+-permeable, nonselective cation channel that is thought to be involved in the regulation of systemic osmotic pressure. Mutations in this gene are the cause of spondylometaphyseal and metatropic dyspla…	344	1259.12	0.5	Non-selective calcium permeant cation channel involved in osmotic sensitivity and mechanosensitivity. Activation by exposure to hypotonicity within the physiological range exhibits an outward rectification (PubMed:18826956, PubMed:18695040). Also activated by heat, low pH, citrate and phorbol esters (PubMed:16293632, PubMed:18826956, PubMed:18695040, PubMed:25256292, PubMed:20037586, PubMed:21964…	4DX1,4DX2
9708	Q8TE23	TAS1R2	GPCR	Tbio	Taste receptor type 1 member 2	GPCR	0.00568766		185	215.713	0.5	Putative taste receptor. TAS1R2/TAS1R3 recognizes diverse natural and synthetic sweeteners.
9724	Q96PN8	TSSK3	Kinase	Tchem	Testis-specific serine/threonine-protein kinase 3		0.170001	This gene encodes a kinase expressed exclusively in the testis that is thought to play a role in either germ cell differentiation or mature sperm function. [provided by RefSeq, Jul 2008]	73	7.56881	0.5	May be involved in a signaling pathway during male germ cell development or mature sperm function.
9743	Q9BSA4	TTYH2	Ion Channel	Tbio	Protein tweety homolog 2		0.197965	This gene encodes a member of the tweety family of proteins. Members of this family function as chloride anion channels. The encoded protein functions as a calcium(2+)-activated large conductance chloride(-) channel, and may play a role in kidney tumorigenesis. Two transcript variants encoding distinct isoforms have been identified for this gene. [provided by RefSeq, Jul 2008]	21	8.4806	1	Probable large-conductance Ca(2+)-activated chloride channel. May play a role in Ca(2+) signal transduction. May be involved in cell proliferation and cell aggregation.
9787	Q9BXM7	PINK1	Kinase	Tbio	Serine/threonine-protein kinase PINK1, mitochondrial	Kinase	0.00100973	This gene encodes a serine/threonine protein kinase that localizes to mitochondria. It is thought to protect cells from stress-induced mitochondrial dysfunction. Mutations in this gene cause one form of autosomal recessive early-onset Parkinson disease. [provided by RefSeq, Jul 2008]	715	1499.65	1	Protects against mitochondrial dysfunction during cellular stress by phosphorylating mitochondrial proteins. Involved in the clearance of damaged mitochondria via selective autophagy (mitophagy) by mediating activation and translocation of PRKN (PubMed:14607334, PubMed:15087508, PubMed:19229105, PubMed:19966284, PubMed:20404107, PubMed:20798600, PubMed:23620051, PubMed:23754282, PubMed:23933751, …
9792	Q9NTG1	PKDREJ	Ion Channel	Tdark	Polycystic kidney disease and receptor for egg jelly-related protein	IC	0.104818	This intronless gene encodes a member of the polycystin protein family. The encoded protein contains 11 transmembrane domains, a receptor for egg jelly (REJ) domain, a G-protein-coupled receptor proteolytic site (GPS) domain, and a polycystin-1, lipoxygenase, alpha-toxin (PLAT) domain. This protein may play a role in human reproduction. Alternative splice variants have been described but their bi…	29	15.8329	0.833333	May have a central role in fertilization. May generate a Ca(2+) transporting channel directly involved in initiating the acrosome reaction of the sperm.
[truncated: 1,268 more rows]

## Sheet: S3
Table S3. Curated list of 335 human gut bacterial metabolites, corresponding to Figure 1C.
PubChem_CID	Compound	Compound_name	Kingdom	Superclass	Class	Subclass	canonical_smiles	inchikey	SMILES
[truncated: 335 more rows]

## Sheet: S4
Table S4. The relative abundances (log2 fold change) of 335 metabolites compared to the germ-free controls derived from the study by Qiu et al.
[truncated: 159 more rows]
[truncated: 286 more columns]

## Sheet: S5
Table S5. All datasets used in multi-omics analysis
Dataset ID: E1
[truncated: 375 more rows]

## Sheet: S6
Table S6. Details of 570 binding pockets used for molecular docking analysis.
[truncated: 572 more rows]

[truncated: 49 more sheets: S7, S8, S9A, S9B, S9C, S10_E1, S10_E2, S10_E3, S10_E4, S10_E5, S10_E6, S10_E7, S10_E8, S10_E9, S10_E10, S10_E11, S10_E12, S10_E13, S10_E14, S10_E15 …]
